# Supplementary material for: The catechol moiety of obafluorin is essential for antibacterial activity
Source: Royal Society of Chemistry journal article supplement (doi:10.1039/d3cb00127j), 2023-01-01
Supplement: d3cb00127j1.pdf [file d3cb00127j1.pdf]

## Supporting Information

### The catechol moiety of obafluorin is essential for antibacterial activity

Sibyl F. D. Batey<sup>‡a</sup>, Melissa J. Davie<sup>‡a</sup>, Edward S. Hems<sup>‡a</sup>, Jonathon D. Liston<sup>a</sup>, Thomas A. Scott<sup>a</sup>, Silke Alt<sup>a</sup>, Christopher S. Francklyn<sup>b</sup> & Barrie Wilkinson<sup>\*a</sup>

<sup>a</sup>Department of Molecular Microbiology, John Innes Centre, Norwich Research Park, Norwich NR4 7UH, UK. E-mail: barrie.wilkinson@jic.ac.uk

<sup>b</sup>Department of Biochemistry, College of Medicine, University of Vermont, Burlington, Vermont 05405, United States. E-mail: christopher.francklyn@med.uvm.edu

<sup>‡</sup>These authors contributed equally to this work

### Table of Contents

|                                                                                   |    |
|-----------------------------------------------------------------------------------|----|
| Chrome azurol S (CAS) assays .....                                                | 2  |
| HRMS Metal Binding .....                                                          | 4  |
| Job plots to determine iron complex stoichiometry.....                            | 6  |
| 4-(2-pyridylazo)-resorcinol (PAR) assays .....                                    | 7  |
| Minimum inhibitory concentrations (MIC) bioassays .....                           | 10 |
| PfThrRS aminoacylation assays .....                                               | 16 |
| Bioassays with modified iron concentrations .....                                 | 17 |
| Hydrolysis of analogues 2-4 in the absence and presence of Fe <sup>3+</sup> ..... | 21 |
| Tabulated NMR and spectra.....                                                    | 23 |
| Obafluorin (1).....                                                               | 23 |
| 2-HBA-obafluorin (2).....                                                         | 29 |
| 3-HBA-obafluorin (3).....                                                         | 35 |
| BA-obafluorin (4).....                                                            | 41 |
| Hydrolysed obafluorin (5).....                                                    | 47 |
| Methanolysed obafluorin (6).....                                                  | 53 |
| Hydrolysed BA-obafluorin (7) .....                                                | 59 |
| References.....                                                                   | 65 |

## Chrome azurol S (CAS) assays

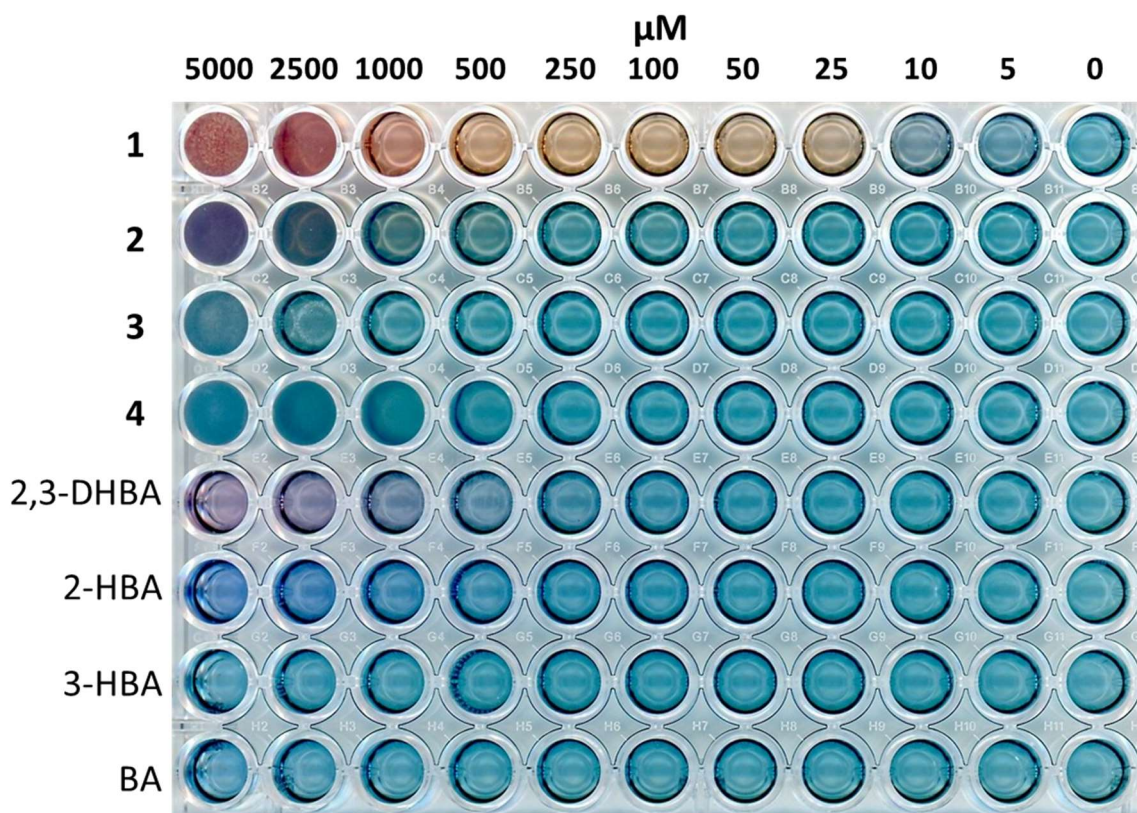

**Figure S1: The catechol is essential for the binding of obafluorin (1) to  $\text{Fe}^{3+}$ .** Chrome azurol S (CAS) assay monitoring the binding of  $\text{Fe}^{3+}$  by **1** and the analogues 2-HBA-obafluorin (**2**), 3-HBA-obafluorin (**3**) and BA-obafluorin (**4**), alongside 2,3-dihydroxybenzoic acid (2,3-DHBA), 2-hydroxybenzoic acid (2-HBA), 3-hydroxybenzoic acid (3-HBA) and benzoic acid (BA) controls. A colour change of blue to orange is indicative of  $\text{Fe}^{3+}$  binding. <sup>1</sup> Modification of the catechol group in **2**, **3** and **4** abolishes  $\text{Fe}^{3+}$  binding and **1** shows significantly stronger  $\text{Fe}^{3+}$  binding than 2,3-DHBA, consistent with the stabilisation of the *ortho*-phenolate by hydrogen bonding of the **1** amide proton. <sup>2</sup> Concentrations of test materials is shown above each column of wells. The concentration of all other components including  $\text{Fe}^{3+}$  is constant.

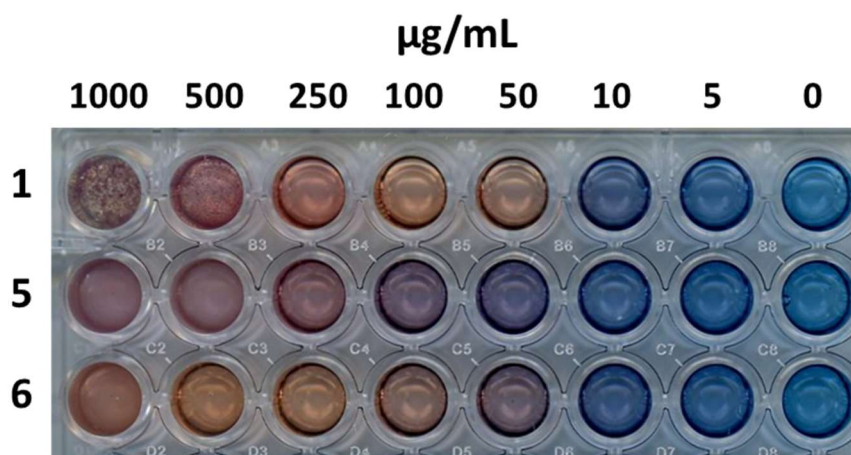

**Figure S2: Ring-open 1 analogues bind  $\text{Fe}^{3+}$ .** CAS assay demonstrating ring-open **1** analogues  $\beta$ -lactone hydrolysed obafluorin (**5**) and methanolysed obafluorin (**6**), display similar  $\text{Fe}^{3+}$  binding to **1**. Concentrations of test substances are shown in  $\mu\text{g/mL}$ , with a concentration of 1000  $\mu\text{g/mL}$  equivalent to 2793, 2659 and 2563  $\mu\text{M}$  for **1**, **5** and **6** respectively.

## HRMS Metal Binding

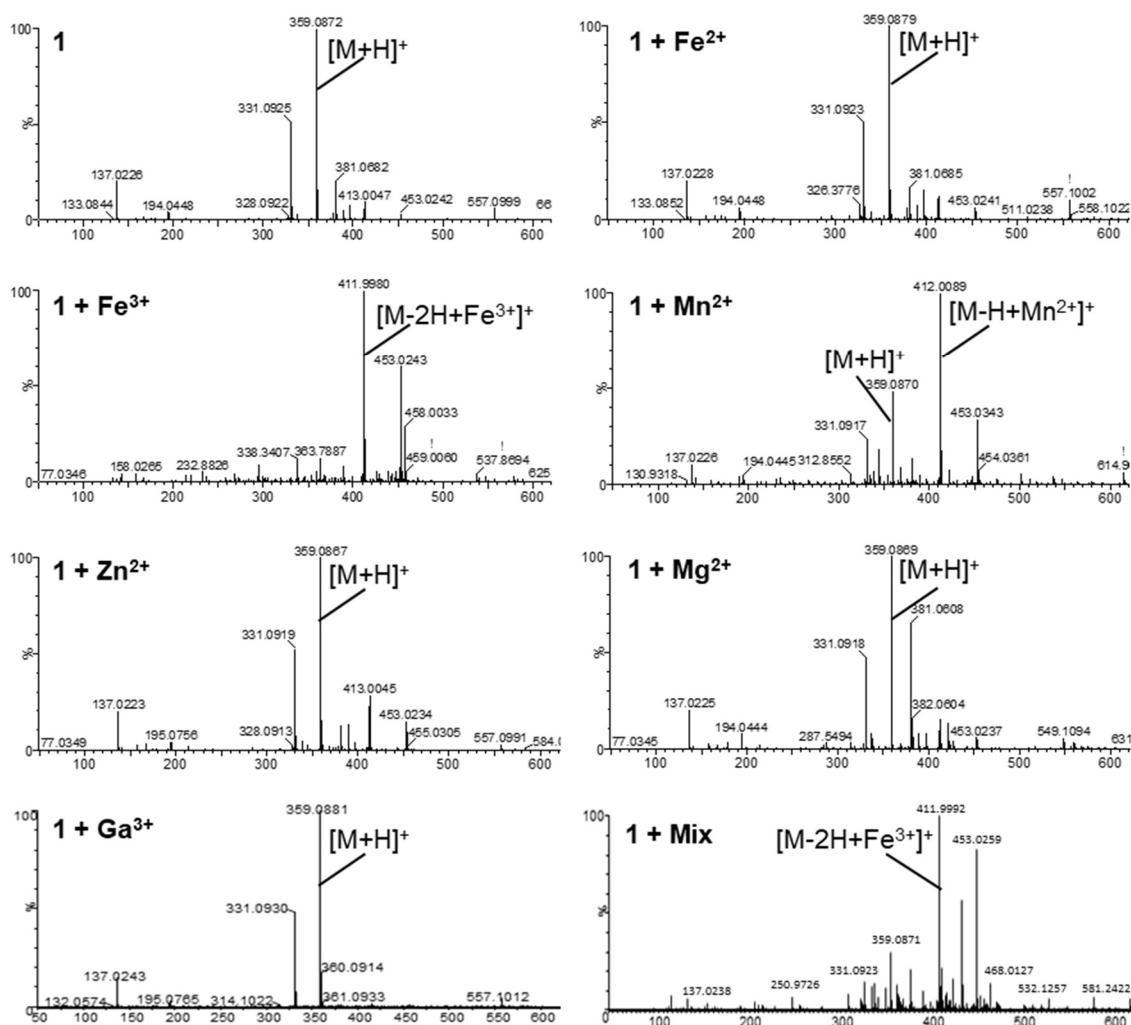

**Figure S3: 1 forms a selective interaction with  $\text{Fe}^{3+}$  detectable by HRMS.** 1 was incubated with a range of metal ions and the resultant adducts were monitored by ESI-HRMS on a Synapt G2-Si mass spectrometer. Only in the presence of  $\text{Fe}^{3+}$  was the  $[\text{M}+\text{H}]^+$  peak fully depleted and the shift to  $411.9980\text{ m/z}$  demonstrates the formation of a  $[\text{M}-2\text{H}+\text{Fe}^{3+}]^+$  species. The additional peak at  $453.0243\text{ m/z}$  is consistent with the  $1\text{-Fe}^{3+}$  species with an additional acetonitrile (ACN) ligand. In the presence of  $\text{Mn}^{2+}$ , a peak consistent with  $[\text{M}-\text{H}+\text{Mn}^{2+}]^+$  was observed, along with some residual  $[\text{M}+\text{H}]^+$  species. When a mixture of all metal ions tested was added,  $[\text{M}-2\text{H}+\text{Fe}^{3+}]^+$  was the major peak. The combined data demonstrate that 1 forms a strong, selective interaction with  $\text{Fe}^{3+}$ .



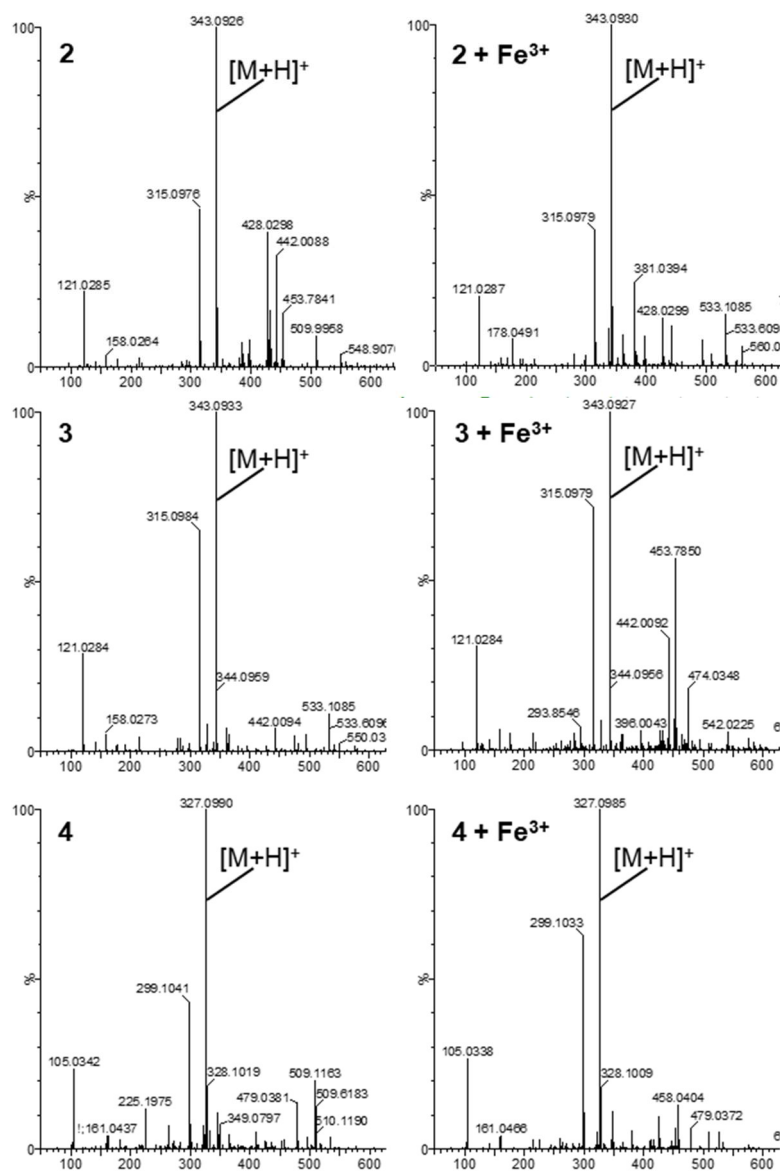

**Figure S4: Analogues 2-4 do not bind  $Fe^{3+}$  by HRMS.** 2-4 were incubated with  $Fe^{3+}$  and the resultant adducts were monitored by ESI-HRMS on a Synapt G2-Si mass spectrometer. No binding to  $Fe^{3+}$  was observed and the  $[M+H]^+$  ions are the major peaks in the presence of  $Fe^{3+}$ , in contrast to 1 (Figure S3).

## Job plots to determine iron complex stoichiometry

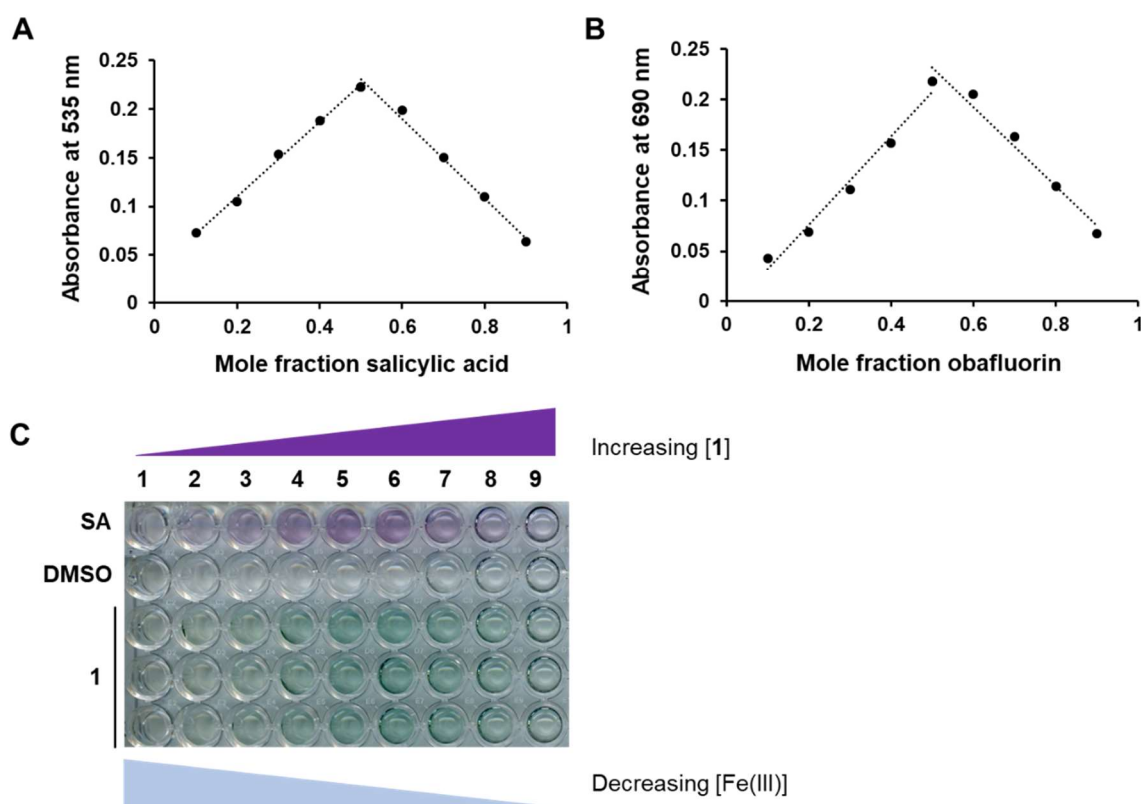

**Figure S5: **1** binds  $\text{Fe}^{3+}$  with a 1:1 stoichiometry.** Job plots for measuring iron complex stoichiometry via UV-visible spectroscopy were carried out with (A) salicylic acid (2-HBA) as a positive control and (B) **1**. The  $\lambda_{\text{max}}$  of the salicylic acid- $\text{Fe}^{3+}$  complex was monitored at 535 nm and the  $\lambda_{\text{max}}$  of the **1**- $\text{Fe}^{3+}$  complex was determined to be 690 nm in the DMSO:H<sub>2</sub>O solvent system employed.<sup>3</sup> Job plots<sup>4</sup> show maximum absorbance at  $\lambda_{\text{max}}$  of the respective complexes at mole fraction 0.5, indicating a 1:1 ratio of **1**: $\text{Fe}^{3+}$ , in common with the salicylic acid control. The experiments were performed in triplicate and error bars are shown but are too small to be visible. C) Image of 96-well plate with increasing **1**/SA: $\text{Fe}^{3+}$  ratio from column 1-9 showing changes in colouration over this range. SA, salicylic acid (positive control), DMSO only (negative control) and **1** in triplicate.

#### 4-(2-pyridylazo)-resorcinol (PAR) assays

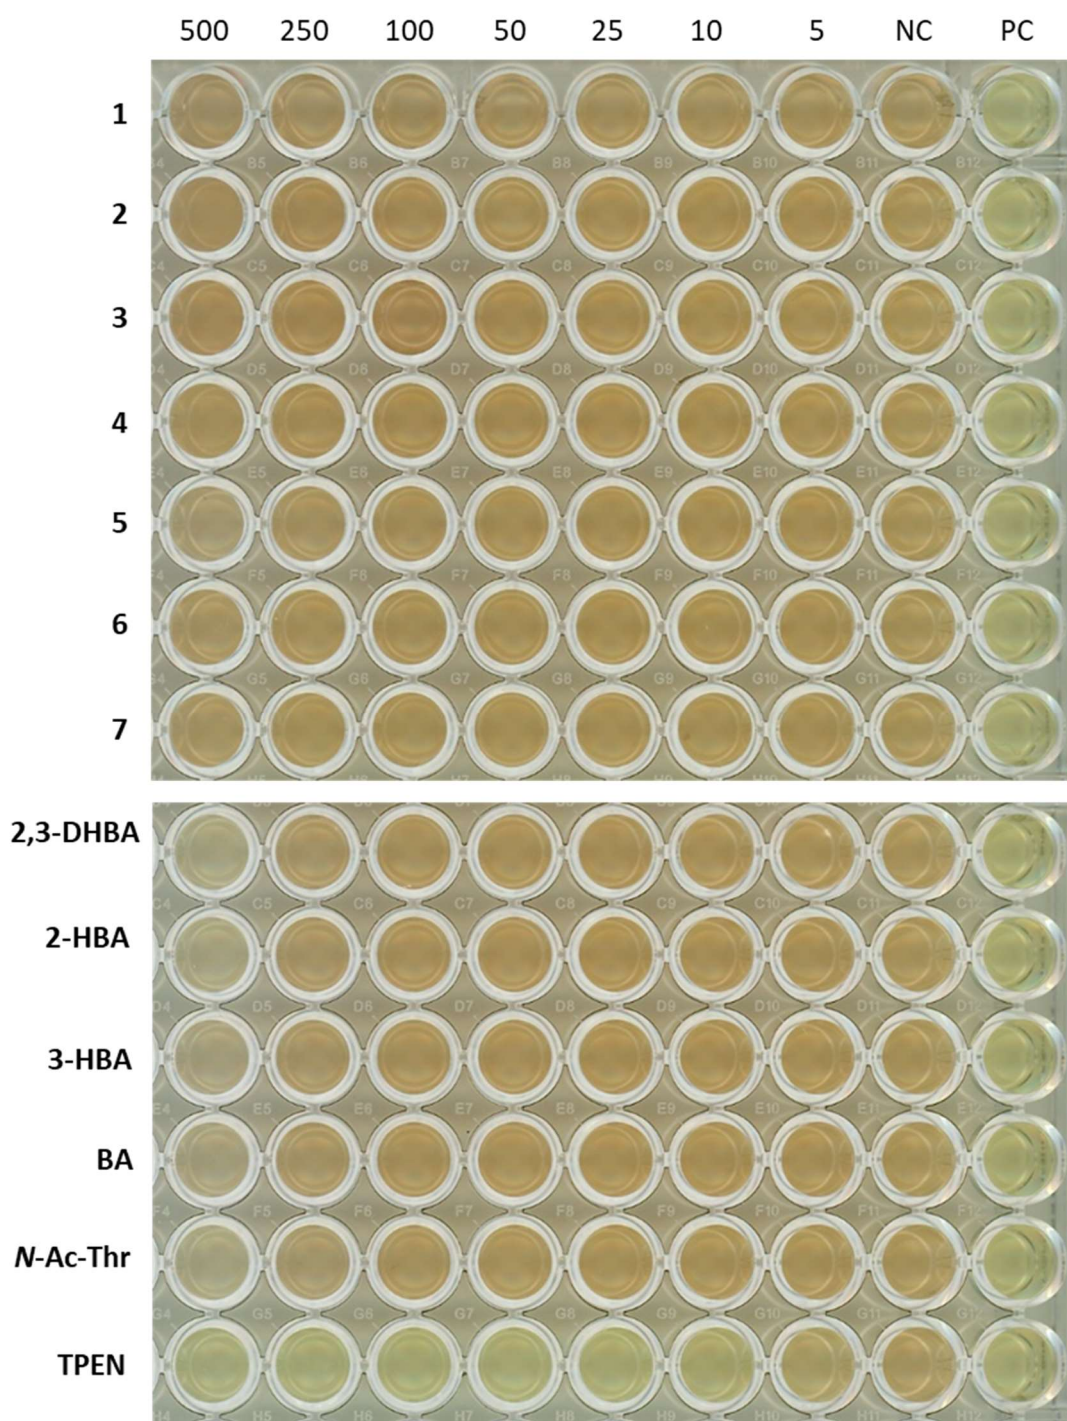

**Figure S6: The catechol moiety of 1 shows weak  $Zn^{2+}$  binding *in vitro*.** Images of PAR assay monitoring the  $Zn^{2+}$  binding ability of 1-7, and 2,3-dihydroxybenzoic acid (2,3-DHBA), 2-hydroxybenzoic acid (2-HBA), 3-hydroxybenzoic acid (3-HBA), benzoic acid (BA), *N*-acetylthreonine (*N*-Ac-Thr) and *N,N,N',N'*-tetrakis(2-pyridinylmethyl)-1,2-ethanediamine (TPEN). Concentrations are in  $\mu M$ . NC (negative control) = 10% DMSO in  $Zn(PAR)_2$  solution. PC (positive control) = 10% DMSO in PAR only solution. The concentration of test substances ( $\mu M$ ) are shown above each column of wells. The concentration of all other components including  $Zn^{2+}$  were constant.

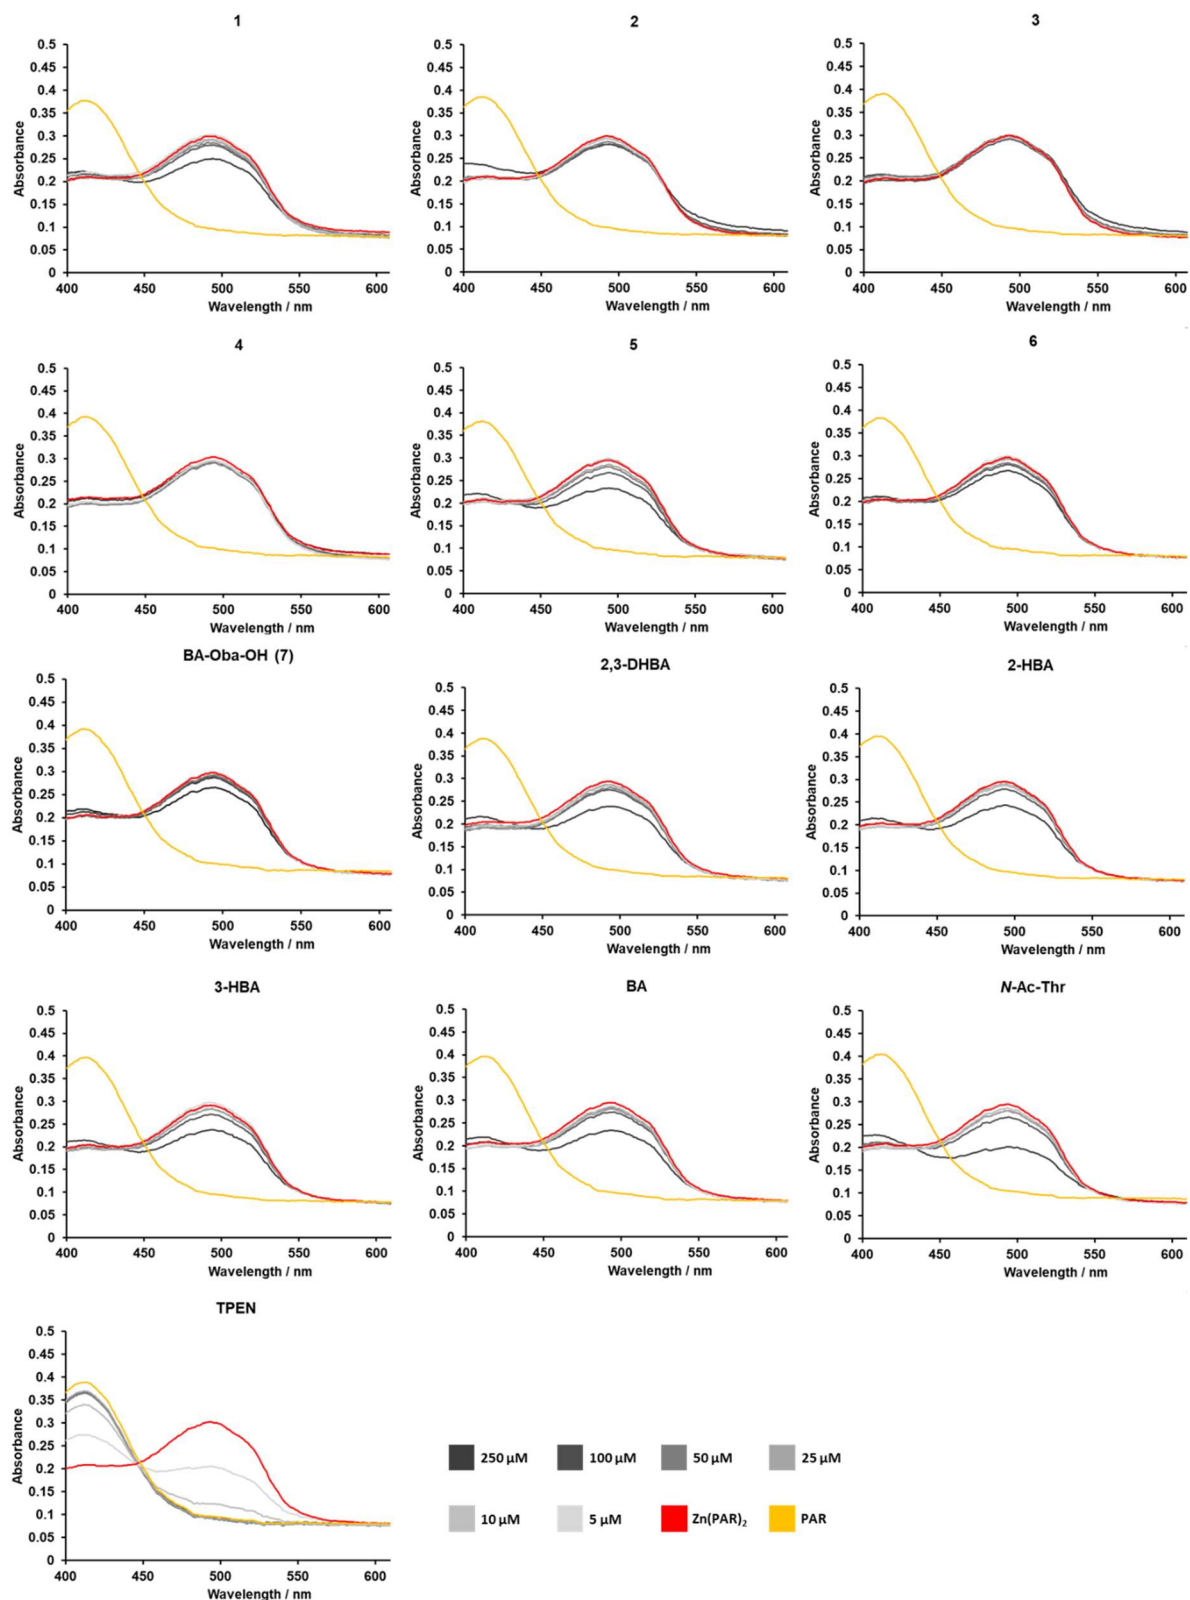

**Figure S7: The catechol moiety of 1 shows weak  $Zn^{2+}$  binding *in vitro*.** Absorbance spectra of 1-6 and  $\beta$ -lactone hydrolysed BA-obafuorin (7), 2,3-dihydroxybenzoic acid (2,3-DHBA), 2-hydroxybenzoic acid (2-HBA), 3-hydroxybenzoic acid (3-HBA), benzoic acid (BA), *N*-acetyl-threonine (*N*-Ac-Thr) and *N,N,N',N'*-tetrakis(2-pyridinylmethyl)-1,2-ethanediamine (TPEN) against  $Zn(PAR)_2$ . PAR (yellow;  $\lambda_{max}$  410 nm) and  $Zn^{2+}$  forms  $Zn(PAR)_2$  (red;  $\lambda_{max}$

495 nm). Titrations of 0.5-25 equivalents of substrate against  $\text{Zn}(\text{PAR})_2$  (grey gradient) were carried out, with  $\text{Zn}^{2+}$  binding indicated by a decrease in  $\text{Zn}(\text{PAR})_2$  and increase in the free PAR as it is displaced from the complex.<sup>5</sup> Whilst the TPEN  $\text{Zn}^{2+}$  binding positive control showed complete displacement of PAR at molar ratios  $>1$ , all **1** and BA analogues showed no or very modest decreases in  $\text{Zn}(\text{PAR})_2$  and only at the highest molar ratios, indicative of weak or negligible  $\text{Zn}^{2+}$  binding. We were surprised to observe a decrease in  $\text{Zn}(\text{PAR})_2$  for the BA control, suggesting that the carboxylic acid group was able to bind  $\text{Zn}^{2+}$  and thus explaining the similar absorbance spectra for 2,3-DHBA, 2-HBA, 3-HBA and BA. To account for potential interference by free carboxylic acids, compound **7** was included, and comparison of the spectra for **4** and **7** demonstrates a slight contribution to  $\text{Zn}^{2+}$  binding by the carboxylic acid released in  $\beta$ -lactone hydrolysis. Likewise, N-Ac-Thr was included as an analogue of the hydrolysed  $\beta$ -lactone lacking the aromatic groups to demonstrate the contribution from the  $\beta$ -hydroxy acid. Comparison of compounds with intact  $\beta$ -lactones showed that for **1** but not **2-4** there is a modest decrease in  $\text{Zn}(\text{PAR})_2$  and slight increase in free PAR, suggestive of some weak  $\text{Zn}^{2+}$  binding via the catechol.



## Minimum inhibitory concentrations (MIC) bioassays

### MRSA

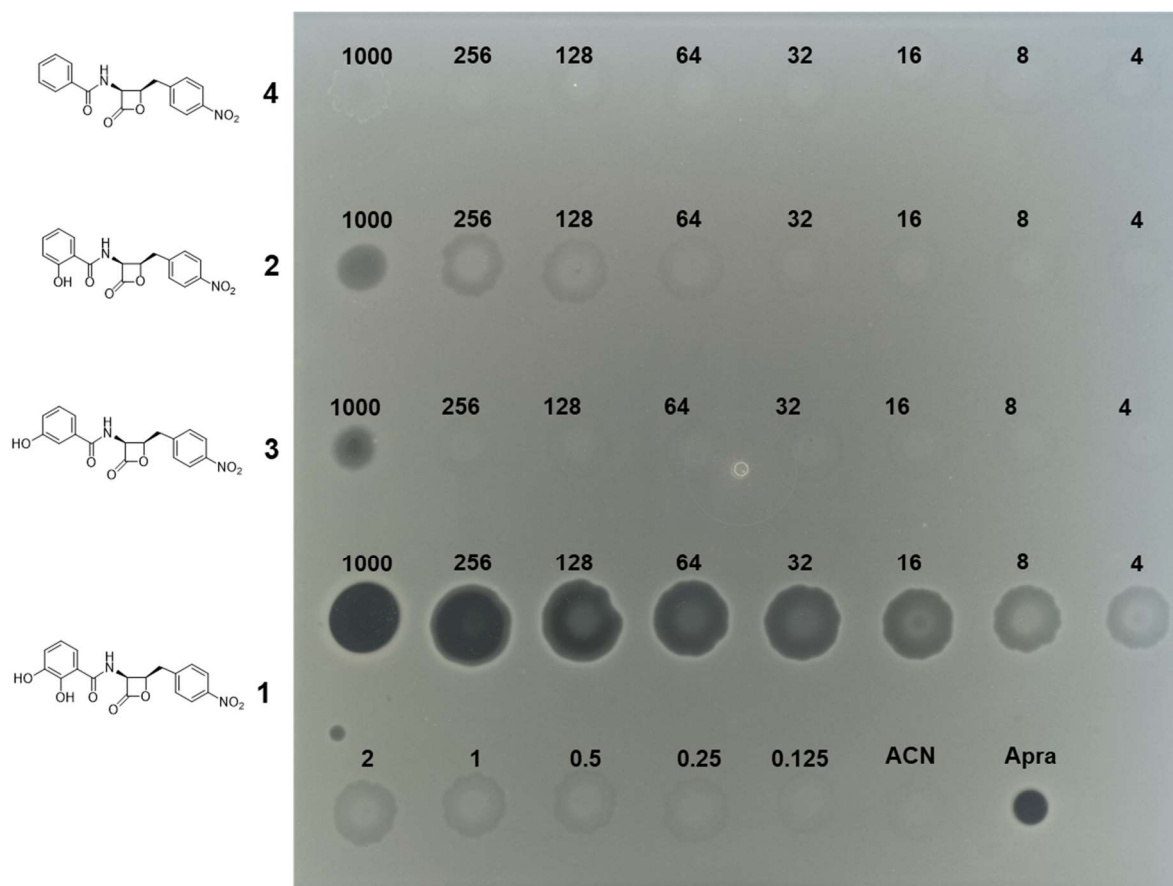

**Figure S8: Modification of the 1-catechol abolishes antibacterial activity against methicillin-resistant *S. aureus* (MRSA).** Spot-on-lawn bioassay of **1**, **2**, **3** and **4** dissolved in acetonitrile (ACN) against MRSA, with zones of clearing indicating growth inhibition. Numbers indicate concentration of **1**, **2**, **3** or **4** in µg/mL. Minimum inhibitory concentrations are **1**: 2 µg/mL; **2** and **3**: 1 mg/mL; **4**: > 1 mg/mL. ACN and apramycin (Apra) (50 µg/mL) were used as negative and positive controls respectively. Part of this image was previously published in Scott, Batey *et al.* 2019, Supplementary Figure 1.<sup>6</sup>



## *B. subtilis*

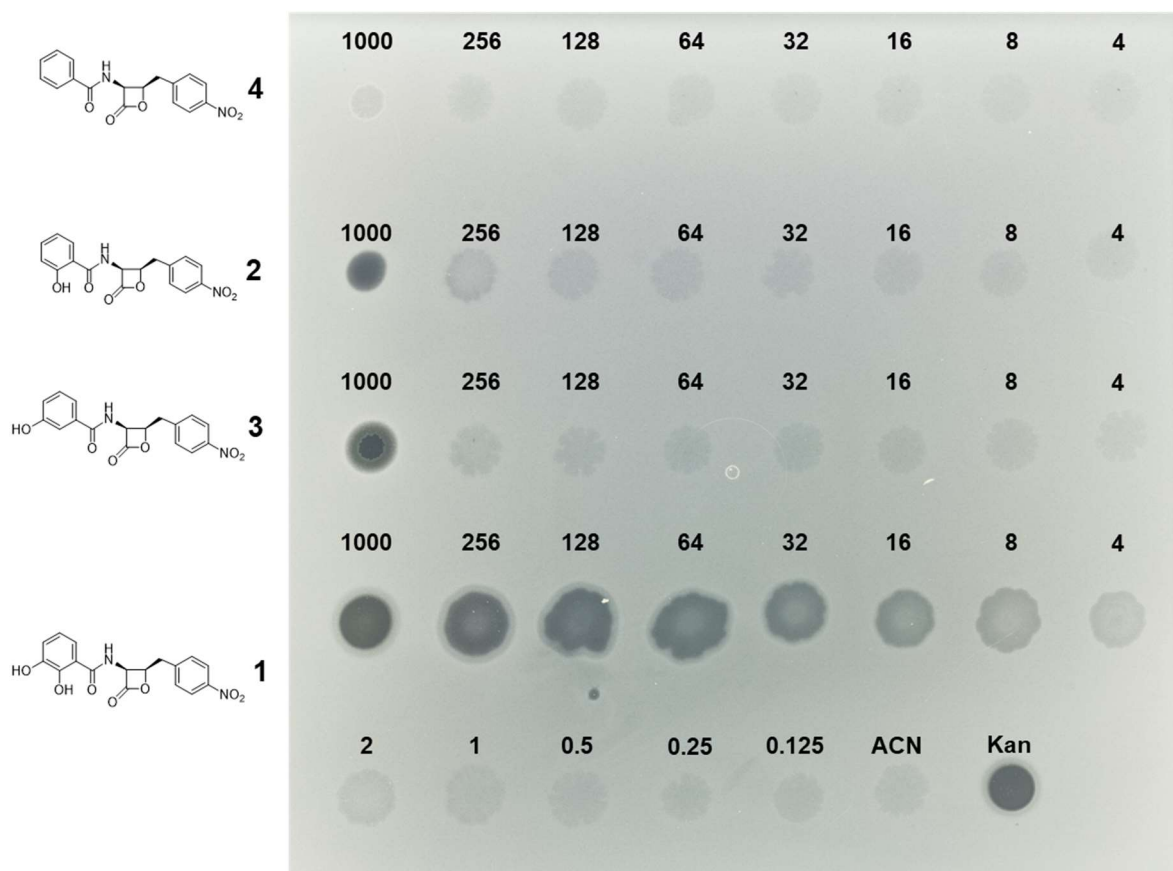

**Figure S9: Modification of the 1-catechol abolishes antibacterial activity against *B. subtilis*.** Spot-on-lawn bioassay of 1, 2, 3 and 4 dissolved in acetonitrile (ACN) against *B. subtilis*, with zones of clearing indicating growth inhibition. Numbers indicate concentration of 1, 2, 3 or 4 in µg/mL. Minimum inhibitory concentrations are 1: 4 µg/mL; 2 and 3: 1 mg/mL; 4: > 1 mg/mL. ACN and kanamycin (Kan) (50 µg/mL) were used as negative and positive controls respectively. Part of this image was previously published in Scott, Batey et al 2019, Supplementary Figure 1.<sup>6</sup>

## *E. coli* 25922

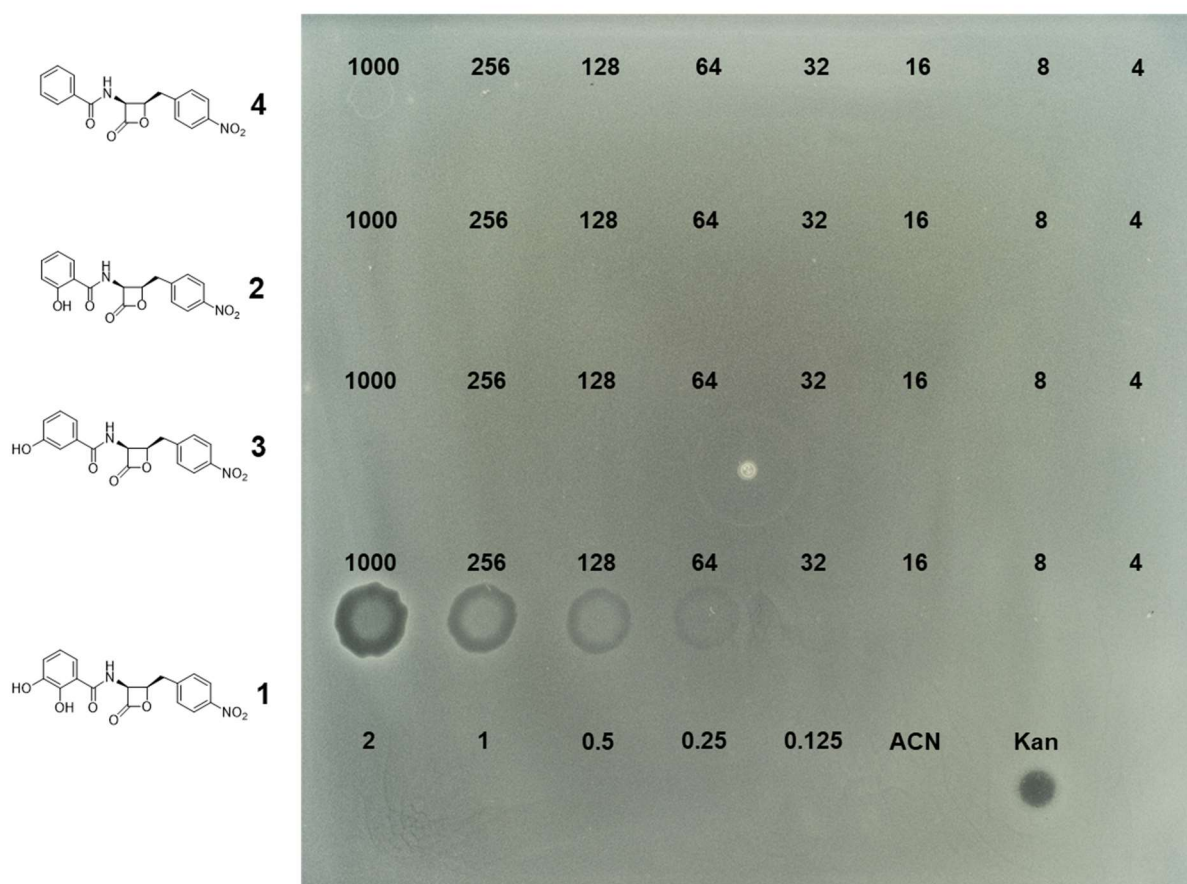

**Figure S10: Modification of the 1-catechol abolishes antibacterial activity against *E. coli* 25922.** Spot-on-lawn bioassay of **1**, **2**, **3** and **4** dissolved in acetonitrile (ACN) against *E. coli* ATCC25922, with zones of clearing indicating growth inhibition. Numbers indicate concentration of **1**, **2**, **3** or **4** in µg/mL. Minimum inhibitory concentrations are **1**: 256 µg/mL; **2**, **3** and **4**: > 1 mg/mL. Acetonitrile (ACN) and kanamycin (Kan) (50 µg/mL) were used as negative and positive controls respectively. Part of this image was previously published in Scott, Batey et al 2019, Supplementary Figure 1.<sup>6</sup>

# *E. coli* NR698

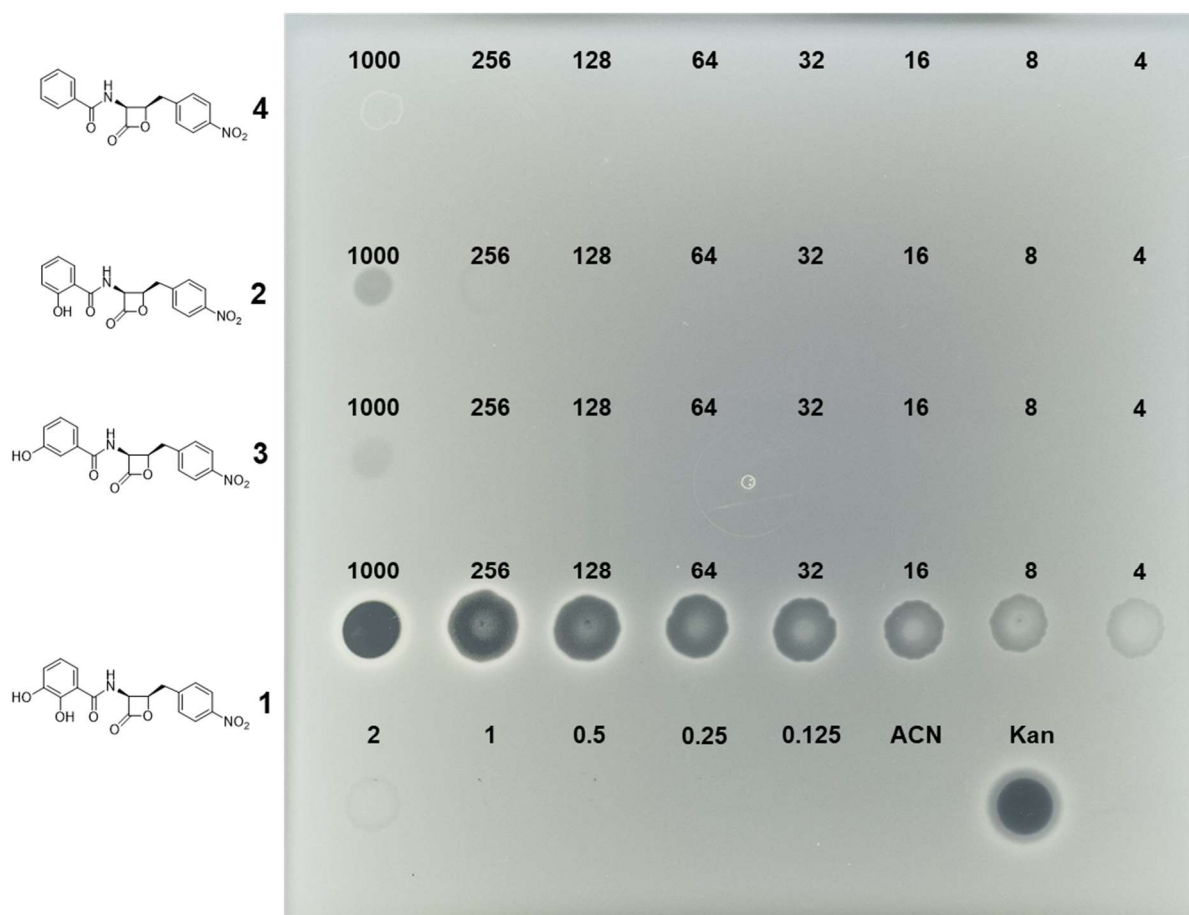

**Figure S11: Modification of the 1-catechol abolishes antibacterial activity against *E. coli* NR698.** Spot-on-lawn bioassay of **1**, **2**, **3** and **4** dissolved in acetonitrile (ACN) against *E. coli* NR698, with zones of clearing indicating growth inhibition. Numbers indicate concentration of **1**, **2**, **3** or **4** in µg/mL. Minimum inhibitory concentrations are **1**: 4 µg/mL; **2**, **3** and **4**: > 1 mg/mL. ACN and kanamycin (Kan) (50 µg/mL) were used as negative and positive controls respectively. Part of this image was previously published in Scott, Batey et al 2019, Supplementary Figure 1.<sup>6</sup>

## *S. cerevisiae*

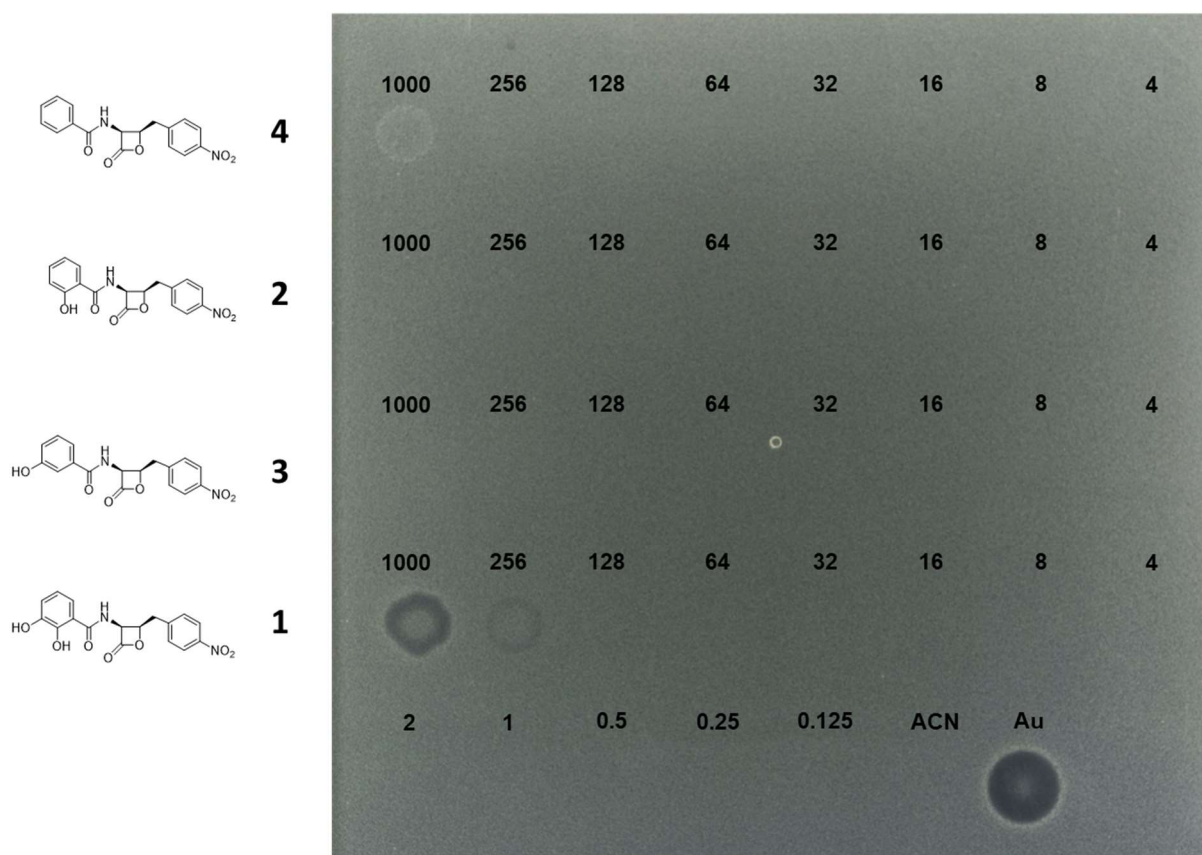

**Figure S12: Modification of the 1-catechol abolishes antifungal activity against *S. cerevisiae*.** Spot-on-lawn bioassay of **1**, **2**, **3** and **4** with *S. cerevisiae*, with zones of clearing indicating growth inhibition. Numbers indicate concentration of **1**, **2**, **3** or **4** in µg/mL. Minimum inhibitory concentrations are **1**: 1 mg/mL; **2**, **3** and **4**: > 1 mg/mL. Acetonitrile (ACN) and aureobasidin A (Au) (0.2 µg/mL) were used as negative and positive controls respectively.

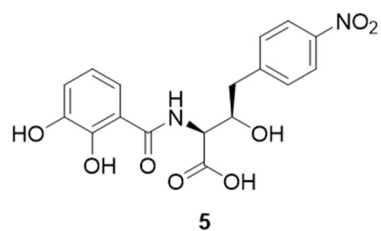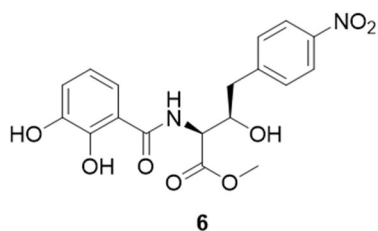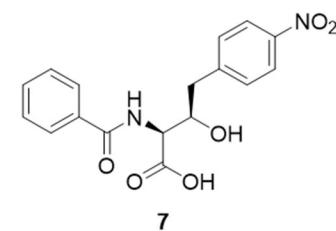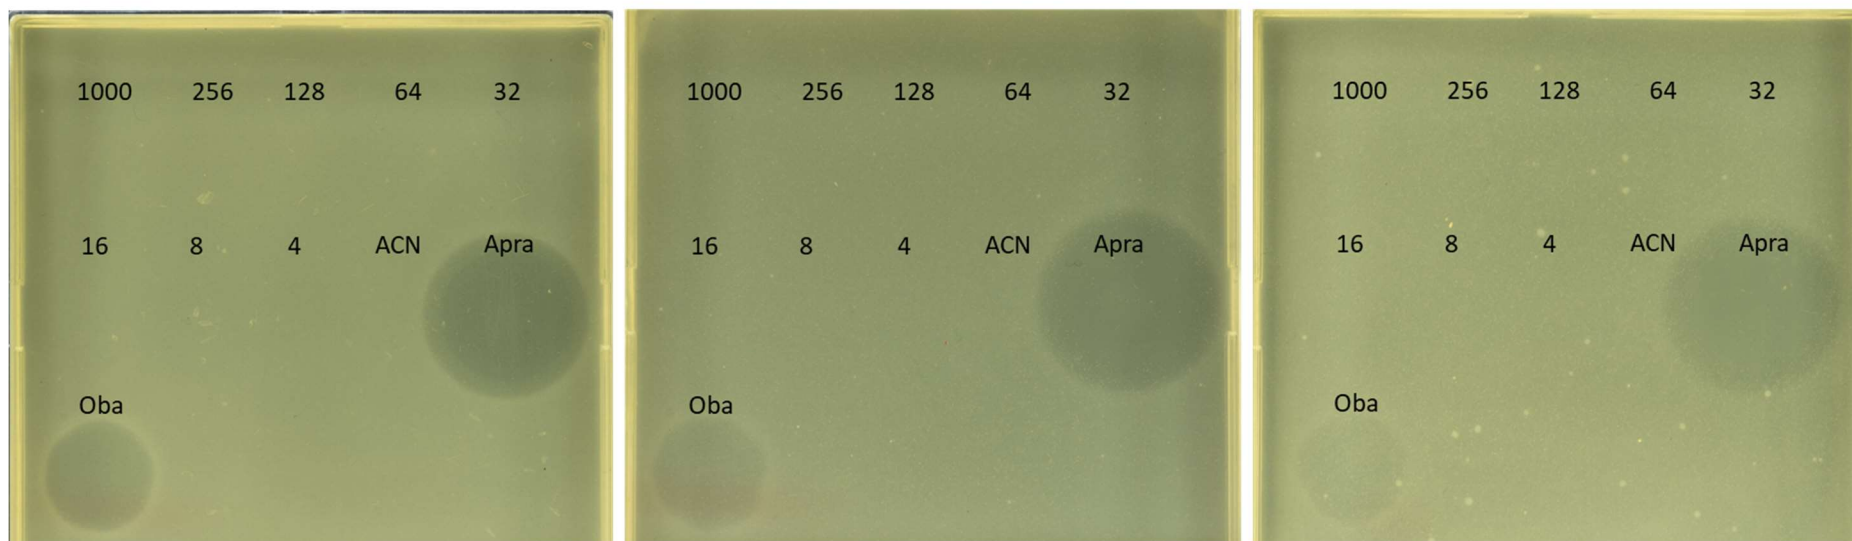

**Figure S13: Ring-open 1-analogues lack antibacterial activity.** Spot-on-lawn bioassays of ring-open analogues **5**, **6** and **7** dissolved in acetonitrile (ACN) against MRSA, with zones of clearing indicating growth inhibition. Numbers indicate concentration of **5**, **6** and **7** in µg/mL. ACN was used as a negative control and apramycin (Apra) (50 µg/mL) and obafurin (Oba) (64 µg/mL) were used as positive controls.



## PfThrRS aminoacylation assays

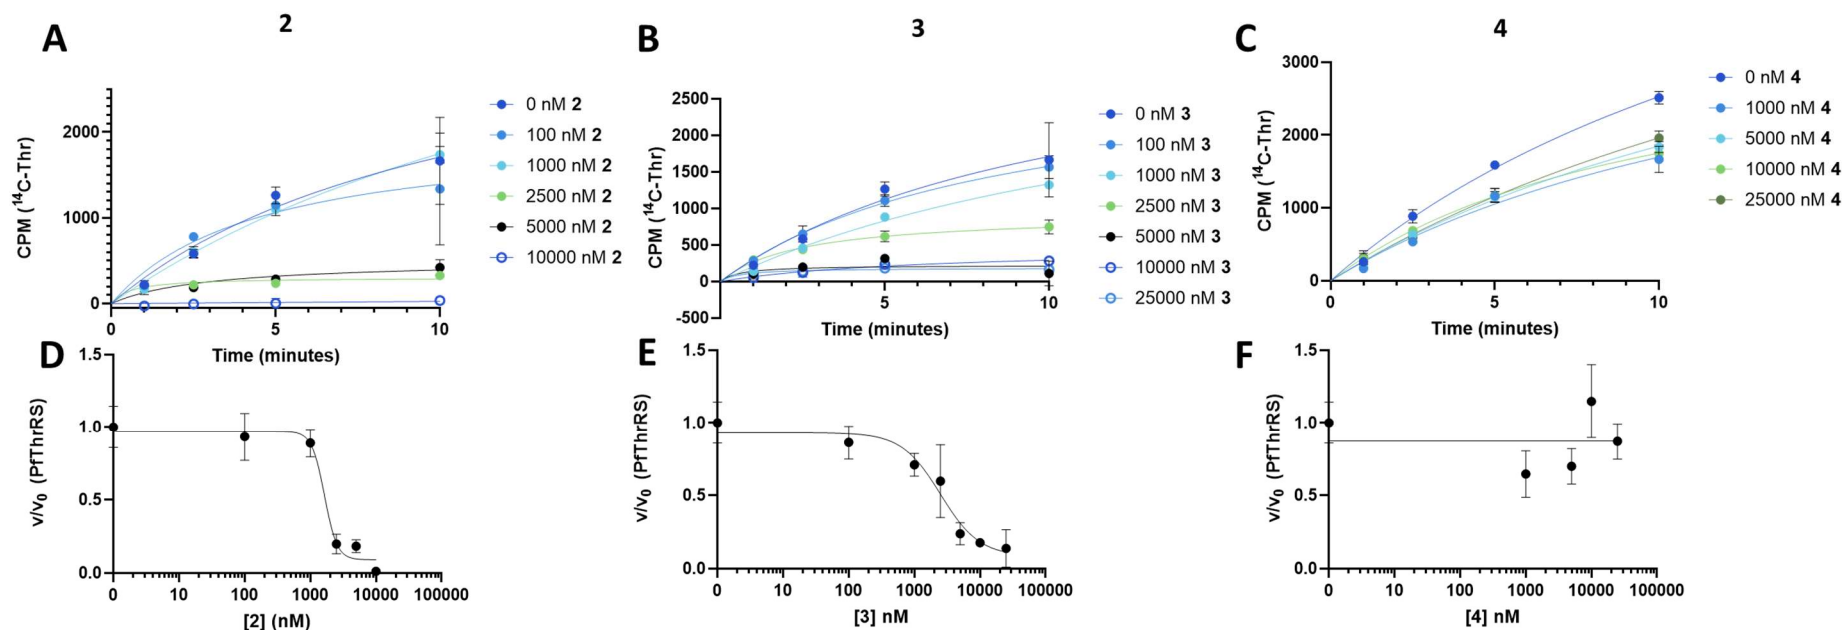

**Figure S14: The catechol moiety of 1 is required for inhibition of PfThrRS.** Progress curves for PfThrRS in the presence of varying (0–25  $\mu$ M) concentrations of **2** (A), **3** (B) and **4** (C). Reactions ( $n = 3$ ) included enzyme at 10 nM, which was preincubated with compound for 10 min prior to the addition of saturating concentrations of tRNA, threonine, and ATP. Compounds **2** and **3** fully inhibited PfThrRS only at 10000 nM and 5000 nM respectively, in comparison to 10 nM for **1** (Figure 5), whereas compound **4** showed no significant inhibition of PfThrRS up to 25000 nM. The linear portions of the progress curves were fit to a linear equation to derive initial rates. Error bars represent the standard error for each time point. Dose response curves for PfThrRS with compound **2** (D), **3** (E) and **4** (F) were calculated from the data in (A), (B) and (C) respectively by plotting the fractional velocity ( $v/v_0$ ) at each measured inhibitor concentration against log [compound].  $IC_{50}$  values for compounds **2** and **3** are  $1600 \pm 300$  nM and  $2500 \pm 800$  nM, respectively. PfThrRS was not inhibited by compound **4**. Details of the fitting routines are presented in the Methods. CPM = counts per min.



## Bioassays with modified iron concentrations

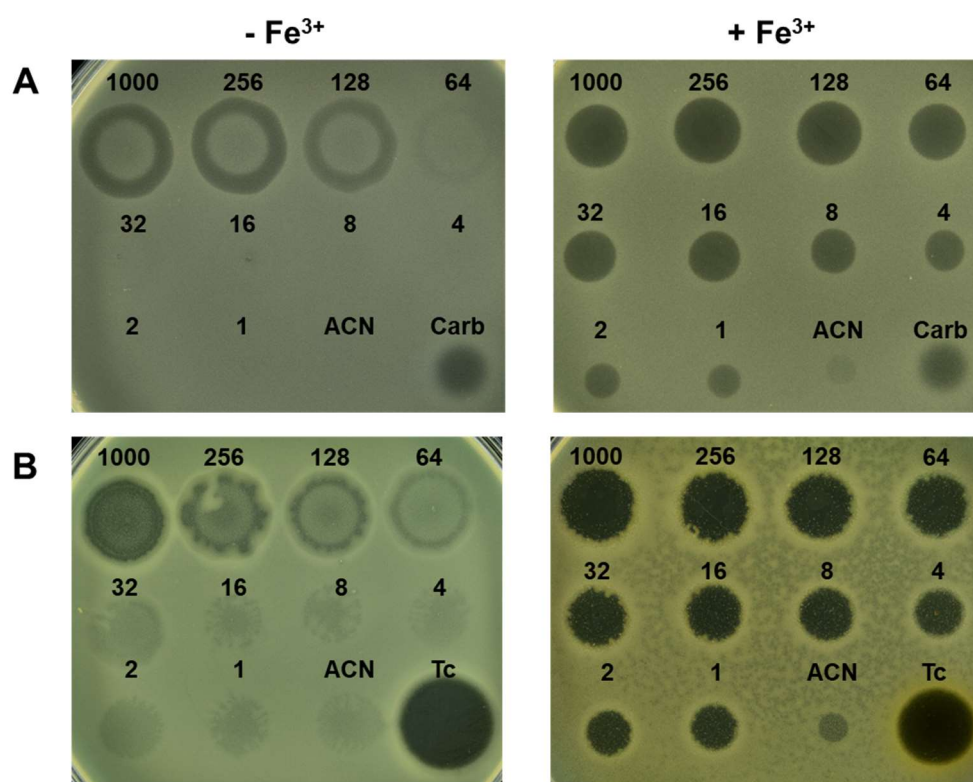

**Figure S15: The presence of additional  $\text{Fe}^{3+}$  increases the bioactivity of **1** against Gram-negative strains.** Spot-on-lawn bioassays of **1** against A) *E. coli* 25922 in the absence and presence of  $\text{Fe}^{3+}$  (2 mM). B) *P. aeruginosa* PA01 in the absence and presence of  $\text{Fe}^{3+}$  (1.5 mM). Concentrations of  $\text{Fe}^{3+}$  are the maximum tolerated by each organism before inhibition of growth was observed. Numbers indicate concentrations of **1** (in  $\mu\text{g/mL}$ ). Acetonitrile (ACN) was used as a negative control and carbenicillin (Carb; 1000  $\mu\text{g/mL}$ ) or tetracycline (Tc; 1000  $\mu\text{g/mL}$ ), were used as the positive controls for *E. coli* 25922 or *P. aeruginosa* respectively. MICs are altered from 256 to  $\leq 1$   $\mu\text{g/mL}$  and 128 to  $\leq 1$   $\mu\text{g/mL}$  for *E. coli* 25922 and *P. aeruginosa* PA01 respectively.

MRSA, added Fe<sup>3+</sup> (2 mM)

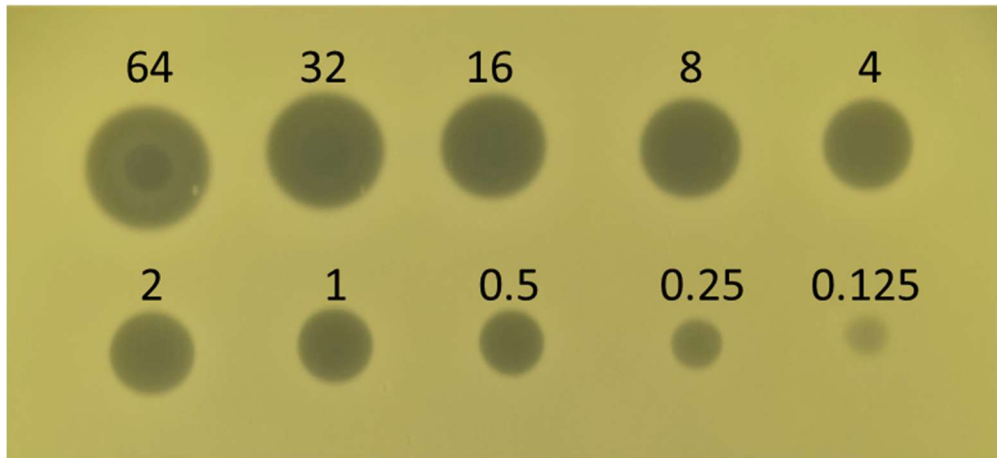

**Figure S16: The presence of additional Fe<sup>3+</sup> decreases the MIC of 1 against MRSA.** Spot-on-lawn bioassay of **1** against MRSA with added Fe<sup>3+</sup> (2 mM). Comparison with Figure S8 shows a reduction in the MIC from 2 to 0.25 µg/mL. Numbers indicate concentrations of **1** (in µg/mL) dissolved in acetonitrile (ACN).

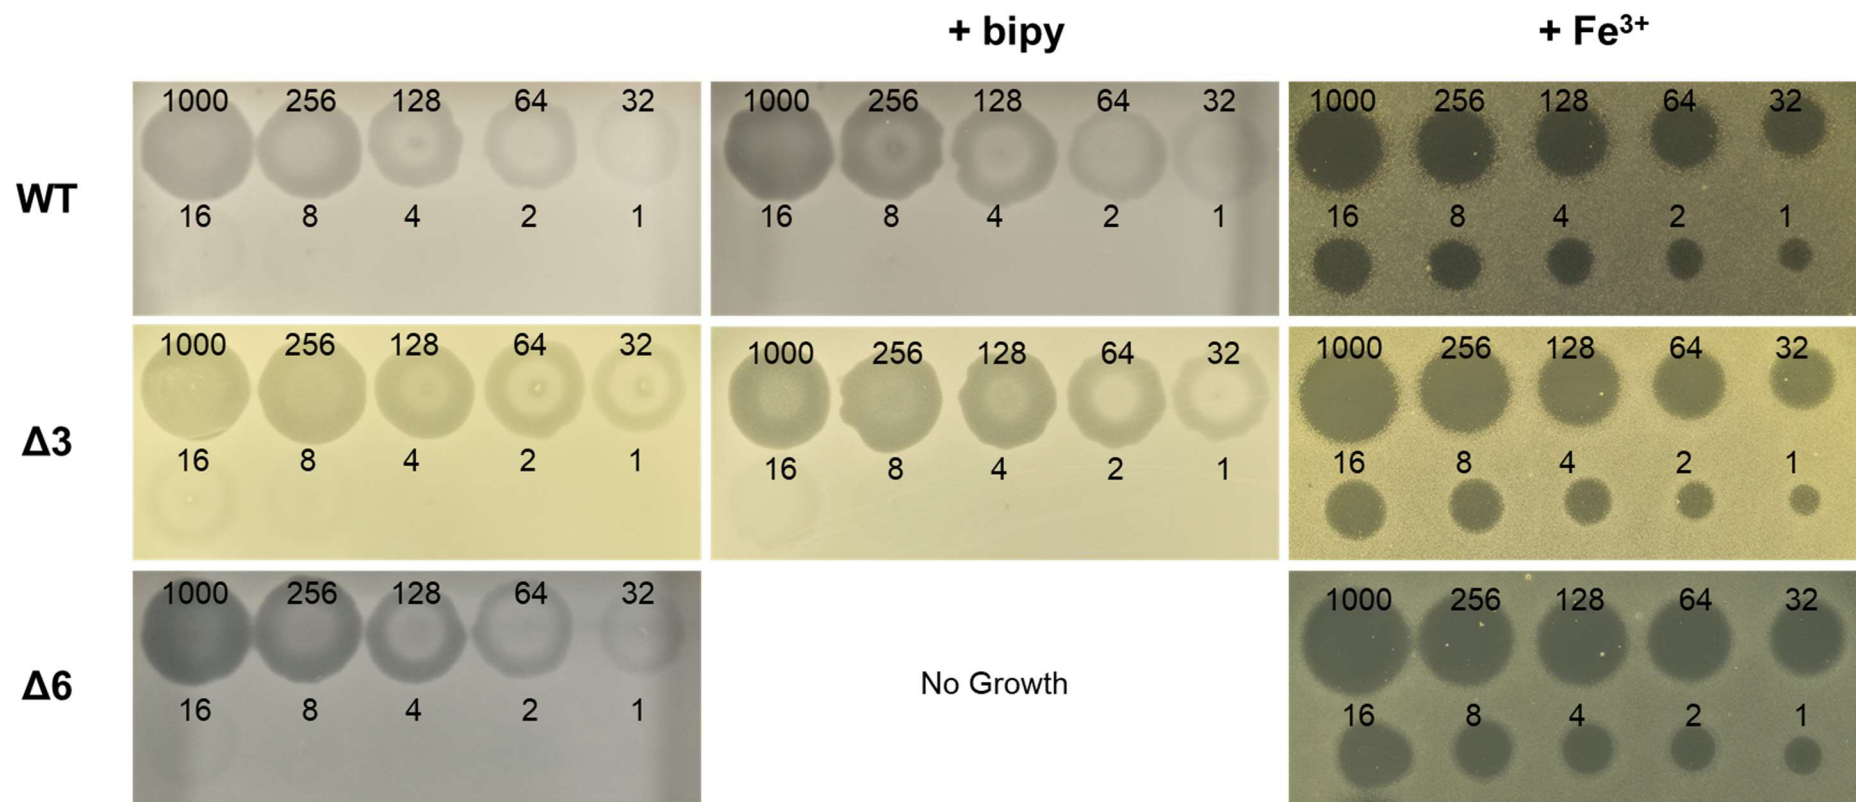

**Figure S17: No active uptake of 1 via TonB-dependent transporters.** Spot-on-lawn bioassays of 1 against *E. coli* BW25113 WT and the TonB dependent transporter (TBDT) knock-out mutants,  $\Delta 3 = \Delta fhuA\Delta fecA\Delta cirA$  and  $\Delta 6 = \Delta fhuA\Delta fecA\Delta cirA\Delta fepA\Delta fhuE\Delta fiu$ . The minimum inhibitory concentration (MIC) of 256  $\mu\text{g/mL}$  for the WT and mutant strains is unchanged in the presence of the  $\text{Fe}^{3+}$  chelator bipy (150  $\mu\text{M}$ ), demonstrating there is no active uptake of 1 via TBDTs. *E. coli* BW25113  $\Delta 6$  was unable to grow in iron deplete conditions. As for *E. coli* 25922 (Figure S16) the MIC is reduced to  $\leq 1$   $\mu\text{g/mL}$  in the presence of  $\text{Fe}^{3+}$  (2 mM).

**Table S1: Changes to antibacterial activity of antibiotics with additional Fe<sup>3+</sup>.** The lowest concentrations (µg/mL) of a range of antibiotics which gave an inhibition zone against *S. aureus* and *E. coli* 25922 in bioassay conditions, with and without additional Fe<sup>3+</sup> (2 mM).

| Antibiotic      | <i>S. aureus</i>   |                    | <i>E. coli</i> 25922 |                    |
|-----------------|--------------------|--------------------|----------------------|--------------------|
|                 | - Fe <sup>3+</sup> | + Fe <sup>3+</sup> | - Fe <sup>3+</sup>   | + Fe <sup>3+</sup> |
| Carbenicillin   | 50                 | 50                 | 1000                 | 1000               |
| Kanamycin       | 50                 | 500                | 50                   | 250                |
| Streptomycin    | 50                 | 500                | 50                   | 100                |
| Nitrofurantoin  | 500                | 250                | 500                  | 100                |
| Chloramphenicol | 1000               | 250                | 1000                 | 500                |
| Apramycin       | 50                 | 1000               | 50                   | 1000               |

## Hydrolysis of analogues 2-4 in the absence and presence of Fe<sup>3+</sup>

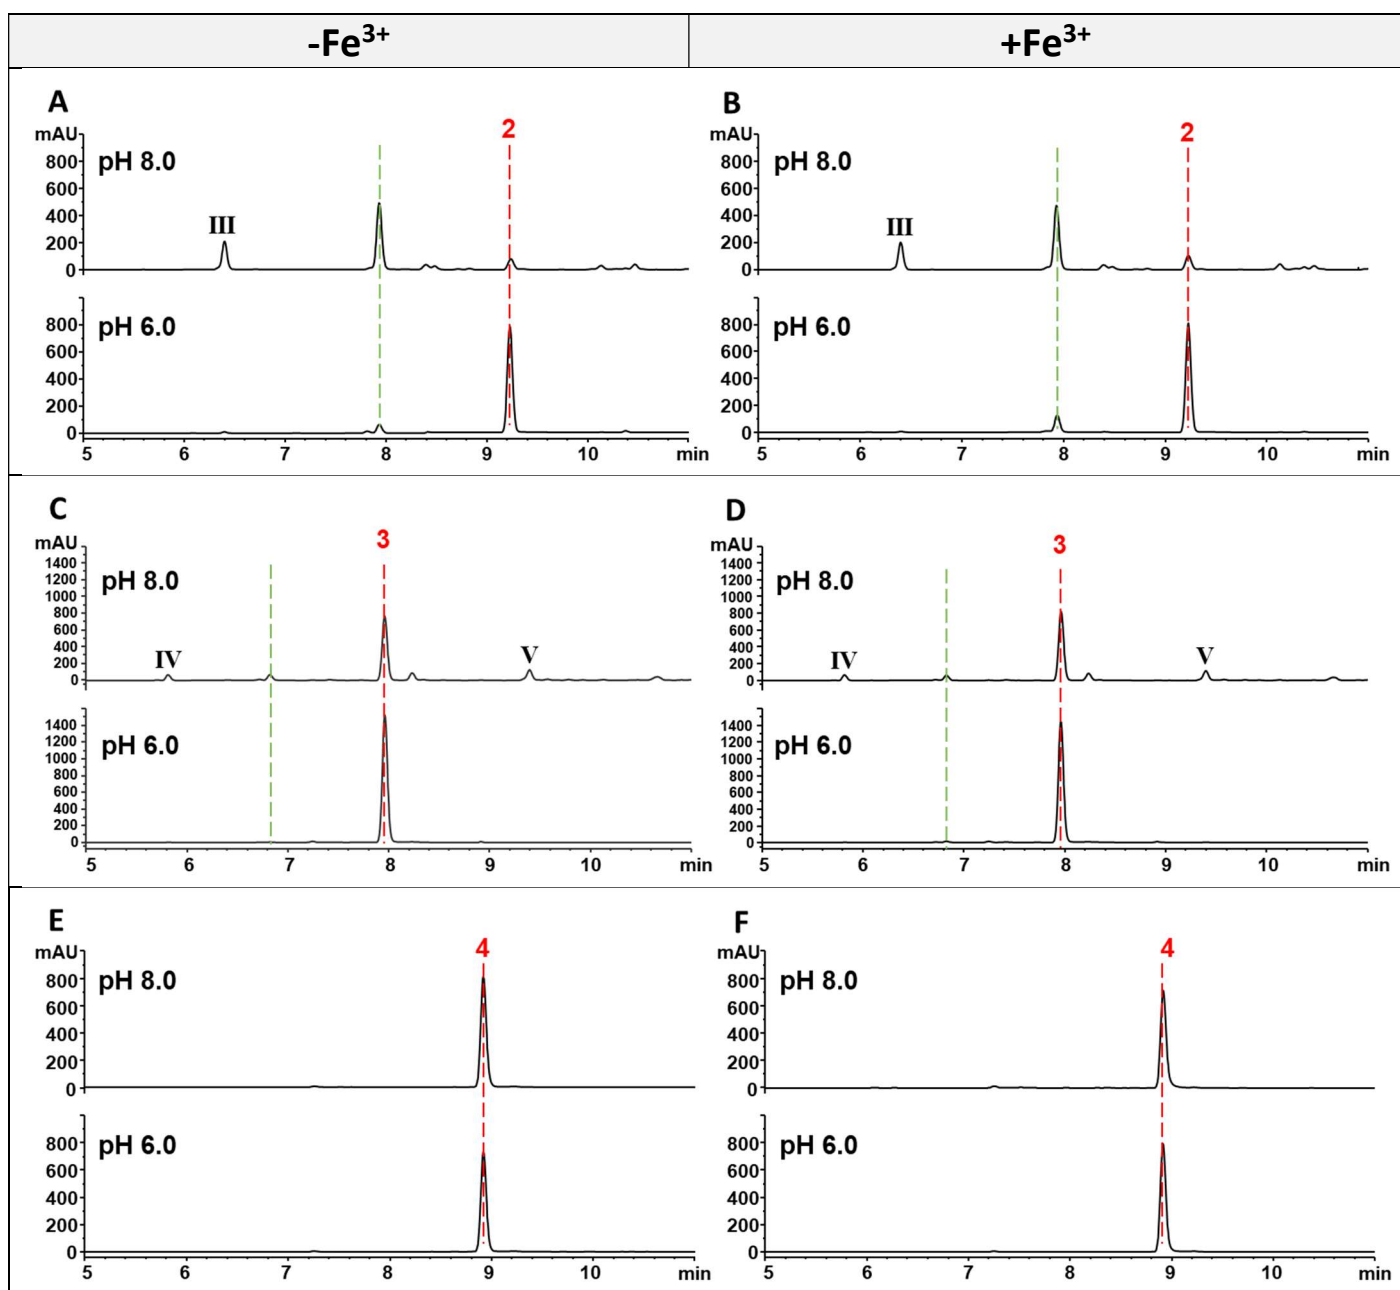

**Figure S18: Fe<sup>3+</sup> does not have a protective effect against hydrolysis of analogues 2-4.** UV chromatograms at 270 nm recorded 30 min after the mixing of solutions of **A**) 2 (1mM) in HEPES buffer (100 mM) at pH 6.0 and 8.0, **B**) 2 (1 mM) in HEPES buffer (100 mM) with added Fe<sup>3+</sup> (1 mM) at pH 6.0 and 8.0; **C**) 3 (1mM) in HEPES buffer (100 mM) at pH 6.0 and 8.0, **D**) 3 (1 mM) in HEPES buffer (100 mM) with added Fe<sup>3+</sup> (1 mM) at pH 6.0 and 8.0; **E**) 4 (1mM) in HEPES buffer (100 mM) at pH 6.0 and 8.0, **F**) 4 (1 mM) in HEPES buffer (100 mM) with added Fe<sup>3+</sup> (1 mM) at pH 6.0 and 8.0. The red lines indicate the intact obafluorin analogue (2-4 respectively) and the green lines indicate the hydrolysed analogue. The side products III and IV are proposed to be adducts of HEPES and the obafluorin analogue, and V is proposed to be a dimer of 3 (Figure S19).

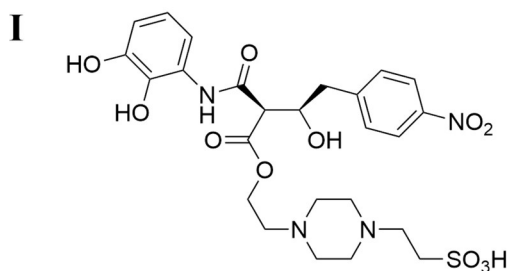

Chemical Formula:  $C_{25}H_{32}N_4O_{11}S$   
 Calculated  $[M+H]^+ = 597.1861$   
 Found  $[M+H]^+ = 597.1867$ ,  $\Delta = 1.0$  ppm

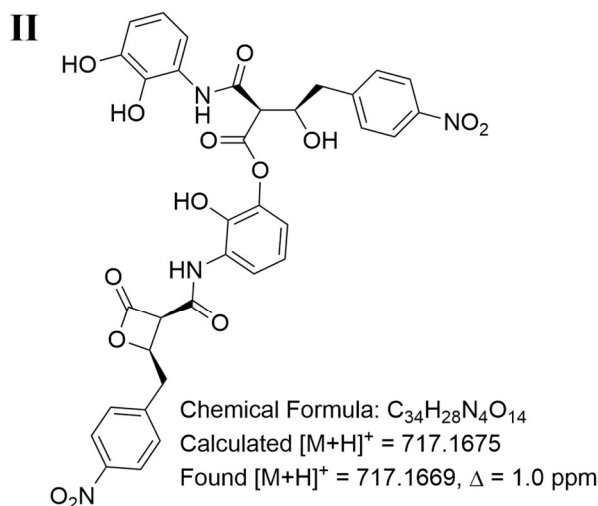

Chemical Formula:  $C_{34}H_{28}N_4O_{14}$   
 Calculated  $[M+H]^+ = 717.1675$   
 Found  $[M+H]^+ = 717.1669$ ,  $\Delta = 1.0$  ppm

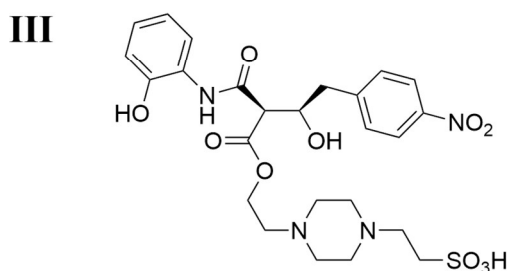

Chemical Formula:  $C_{25}H_{32}N_4O_{10}S$   
 Calculated  $[M+H]^+ = 581.1912$   
 Found  $[M+H]^+ = 581.1911$ ,  $\Delta = -0.2$  ppm

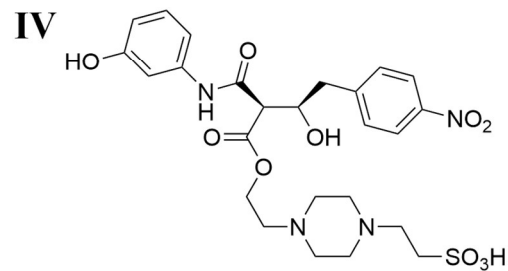

Chemical Formula:  $C_{25}H_{32}N_4O_{10}S$   
 Calculated  $[M+H]^+ = 581.1912$   
 Found  $[M+H]^+ = 581.1906$ ,  $\Delta = -1.0$  ppm

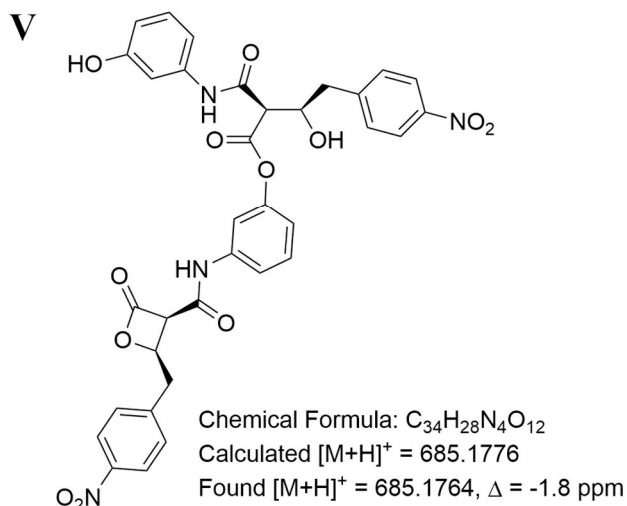

Chemical Formula:  $C_{34}H_{28}N_4O_{12}$   
 Calculated  $[M+H]^+ = 685.1776$   
 Found  $[M+H]^+ = 685.1764$ ,  $\Delta = -1.8$  ppm

**Figure S19: Proposed structures of side products seen in HPLC analysis of hydrolysis experiments.** The side products **I**, **III** and **IV** are proposed to be adducts from the nucleophilic attack of **1** and its analogues (**2** and **3**) by HEPES buffer, and **II** and **V** are proposed to be a dimers of **1** and **3** respectively. We propose dimerization of **1** via 3-OH to give **II** because the calculated pKa of 2-OH and 3-OH are 8.3 and 11.9 respectively.\* The higher pKa of 3-OH means it is a stronger conjugate base, and thus we'd expect higher electron density on this oxygen, making it the better nucleophile.

\* Marvin was used for calculating the pKa values, Marvin 19.3.0, Chemaxon (<https://www.chemaxon.com>)



## Tabulated NMR and spectra

NMR spectra were recorded on a Bruker AVANCE III 400 MHz spectrometer at 298 K. Chemical shifts are reported in parts per million (ppm) relative to the solvent residual peak of acetone ( $^1\text{H}$ : 2.05 ppm, quintet;  $^{13}\text{C}$ : 29.92 ppm, septet).

### Obafluorin (1)

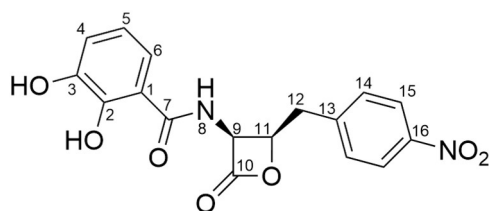

**Table S2:** Resonances assignment in  $^1\text{H}$  and  $^{13}\text{C}$  NMR spectra of **1** in acetone- $d_6$  at 298 K.

| Position | $\delta_{\text{H}}$ (no. of protons, multiplicity, $J$ in Hz) | $\delta_{\text{C}}$ | COSY  | HMBC           |
|----------|---------------------------------------------------------------|---------------------|-------|----------------|
| 1        | 9.05 (1H, d, 4.84)                                            | 114.8               |       |                |
| 2        |                                                               | 150.7               |       |                |
| 3        |                                                               | 147.4               |       |                |
| 4        | 7.37 (1H, d, 7.5)                                             | 118.2               | 5     | 2, 6, 7        |
| 5        | 6.84 (1H, dd, 7.5 & 7.9)                                      | 119.8               | 4, 6  | 1, 3           |
| 6        | 7.05 (1H, d, 7.9)                                             | 120.4               | 5     | 2, 3, 4        |
| 7        |                                                               | 171.4               |       |                |
| 8        | 9.05 (1H, d, 4.7)                                             | -                   | 9     |                |
| 9        | 6.05-6.02 (1H, m)                                             | 59.9                | 8, 11 | 10             |
| 10       |                                                               | 168.8               |       |                |
| 11       | 5.24-5.19 (1H, m)                                             | 78.3                | 9, 12 | 10             |
| 12       | 3.54 (1H, dd, 14.7 & 9.2)<br>3.41 (1H, dd, 14.7 & 4.4)        | 36.1                | 9, 11 | 9, 12, 13, 14  |
| 13       |                                                               | 145.5               |       |                |
| 14       | 7.60 (2H, d, 8.5)                                             | 131.2               | 15    | 12, 14, 15, 16 |
| 15       | 8.16 (2H, d, 8.5)                                             | 124.4               | 14    | 13, 15, 16     |
| 16       |                                                               | 147.9               |       |                |
| 2-OH     | 11.93 (1H, s)                                                 |                     |       | 2, 3, 6        |
| 3-OH     | 8.16 (1H, m)                                                  |                     |       |                |

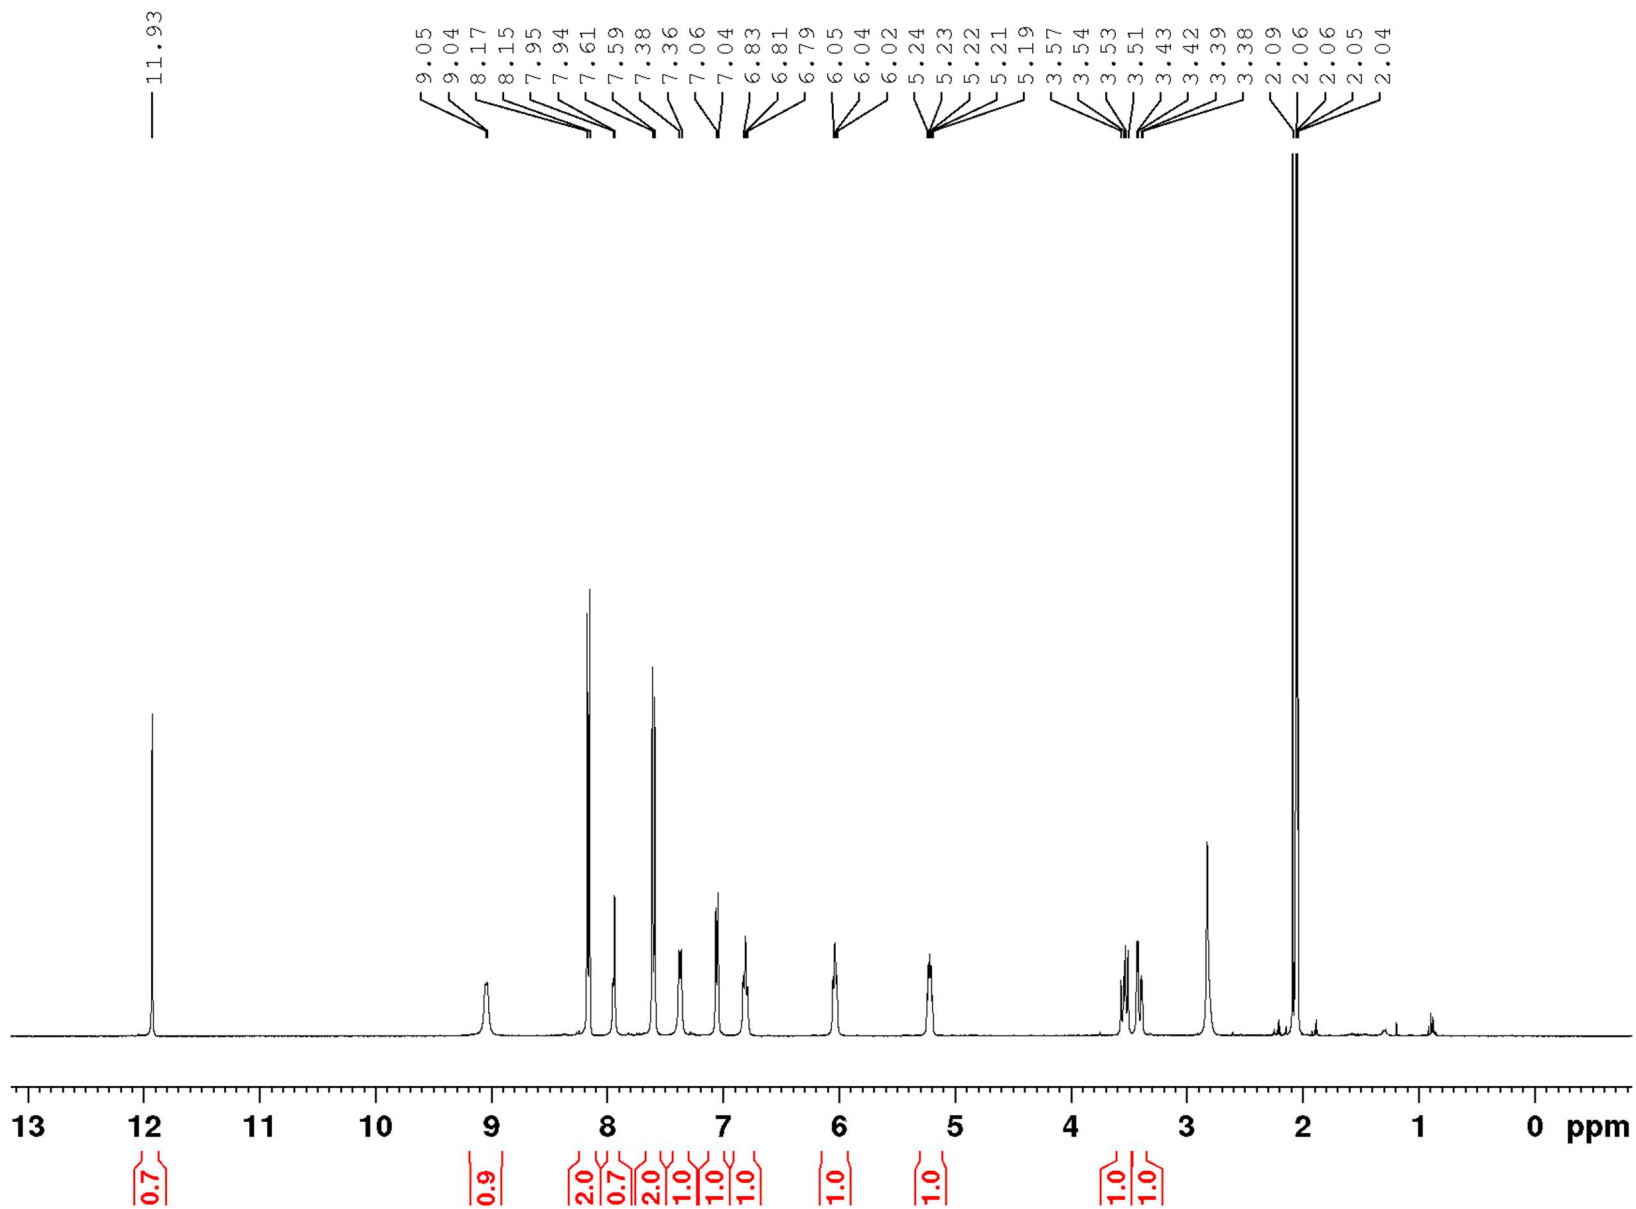

Figure S20:  $^1\text{H}$  NMR of 1 in acetone- $\text{d}_6$  at 298 K.

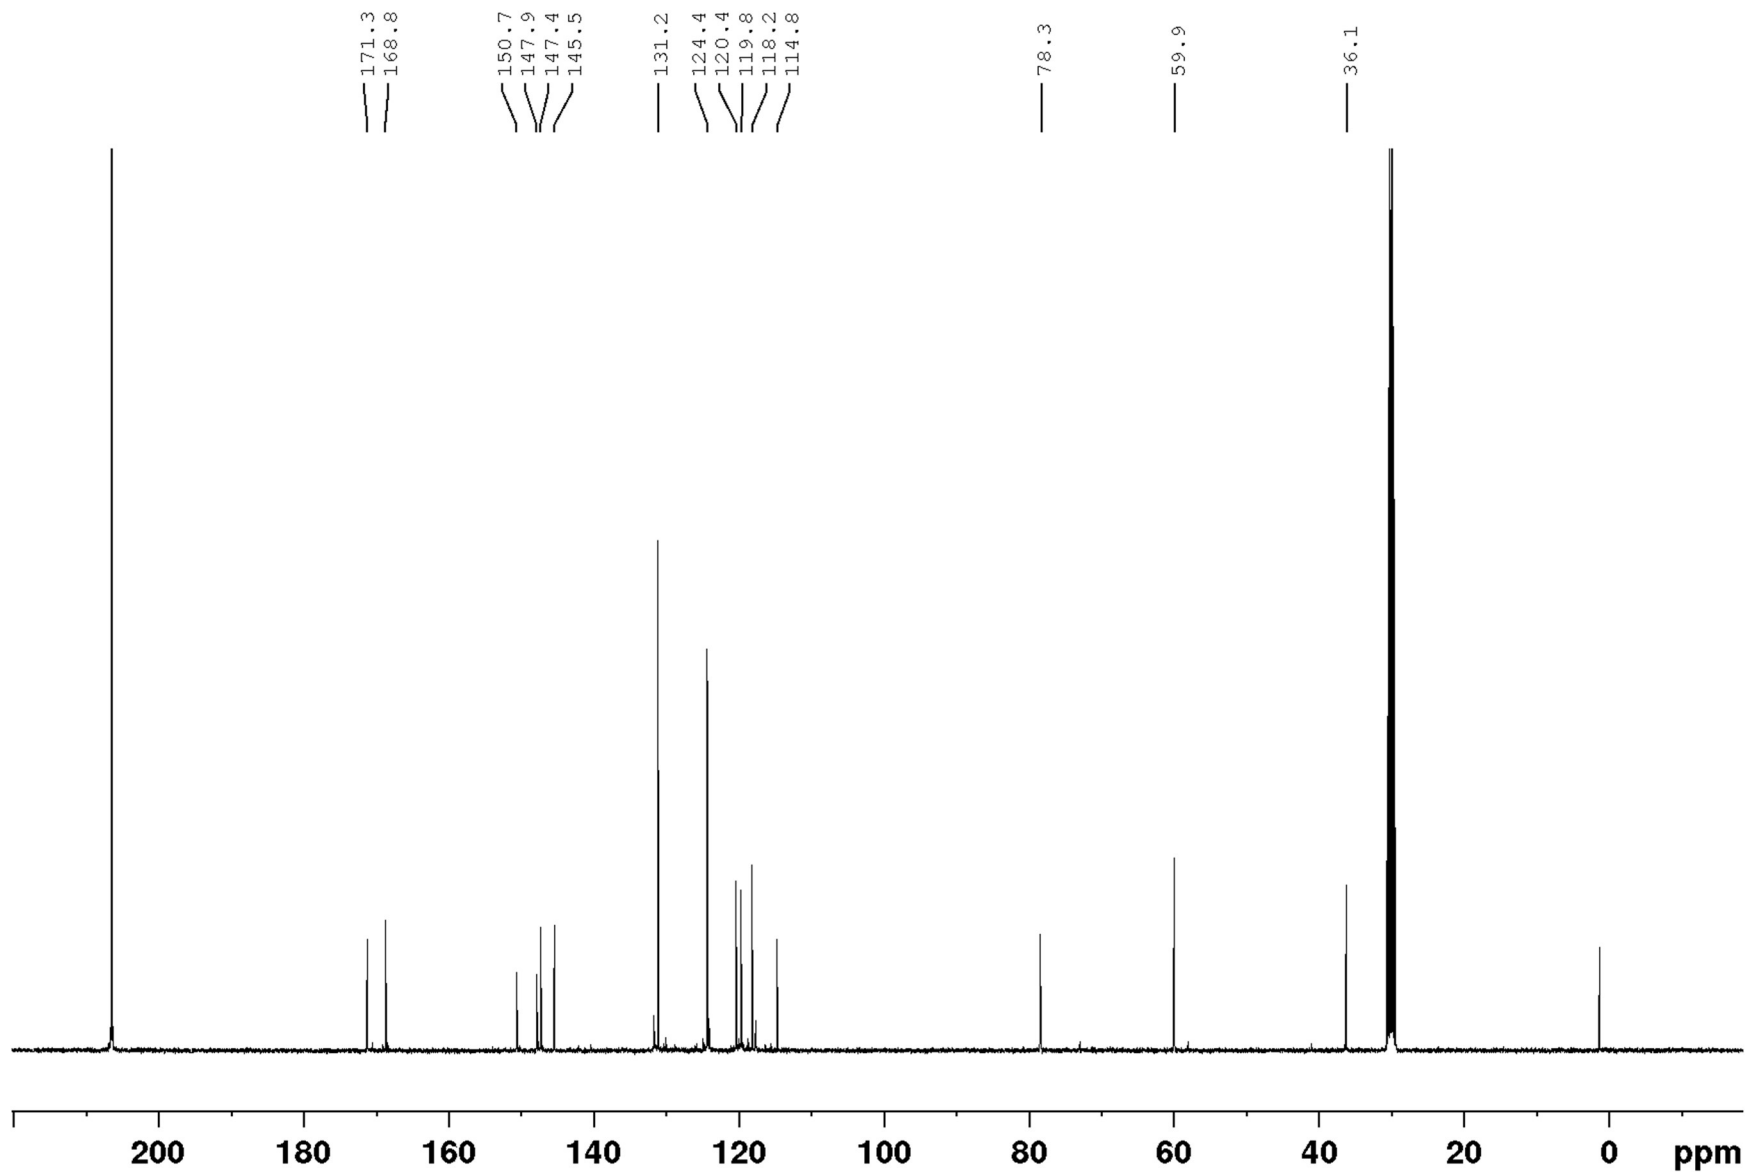

Figure S21:  $^{13}\text{C}$  NMR of **1** in acetone- $\text{d}_6$  at 298 K.

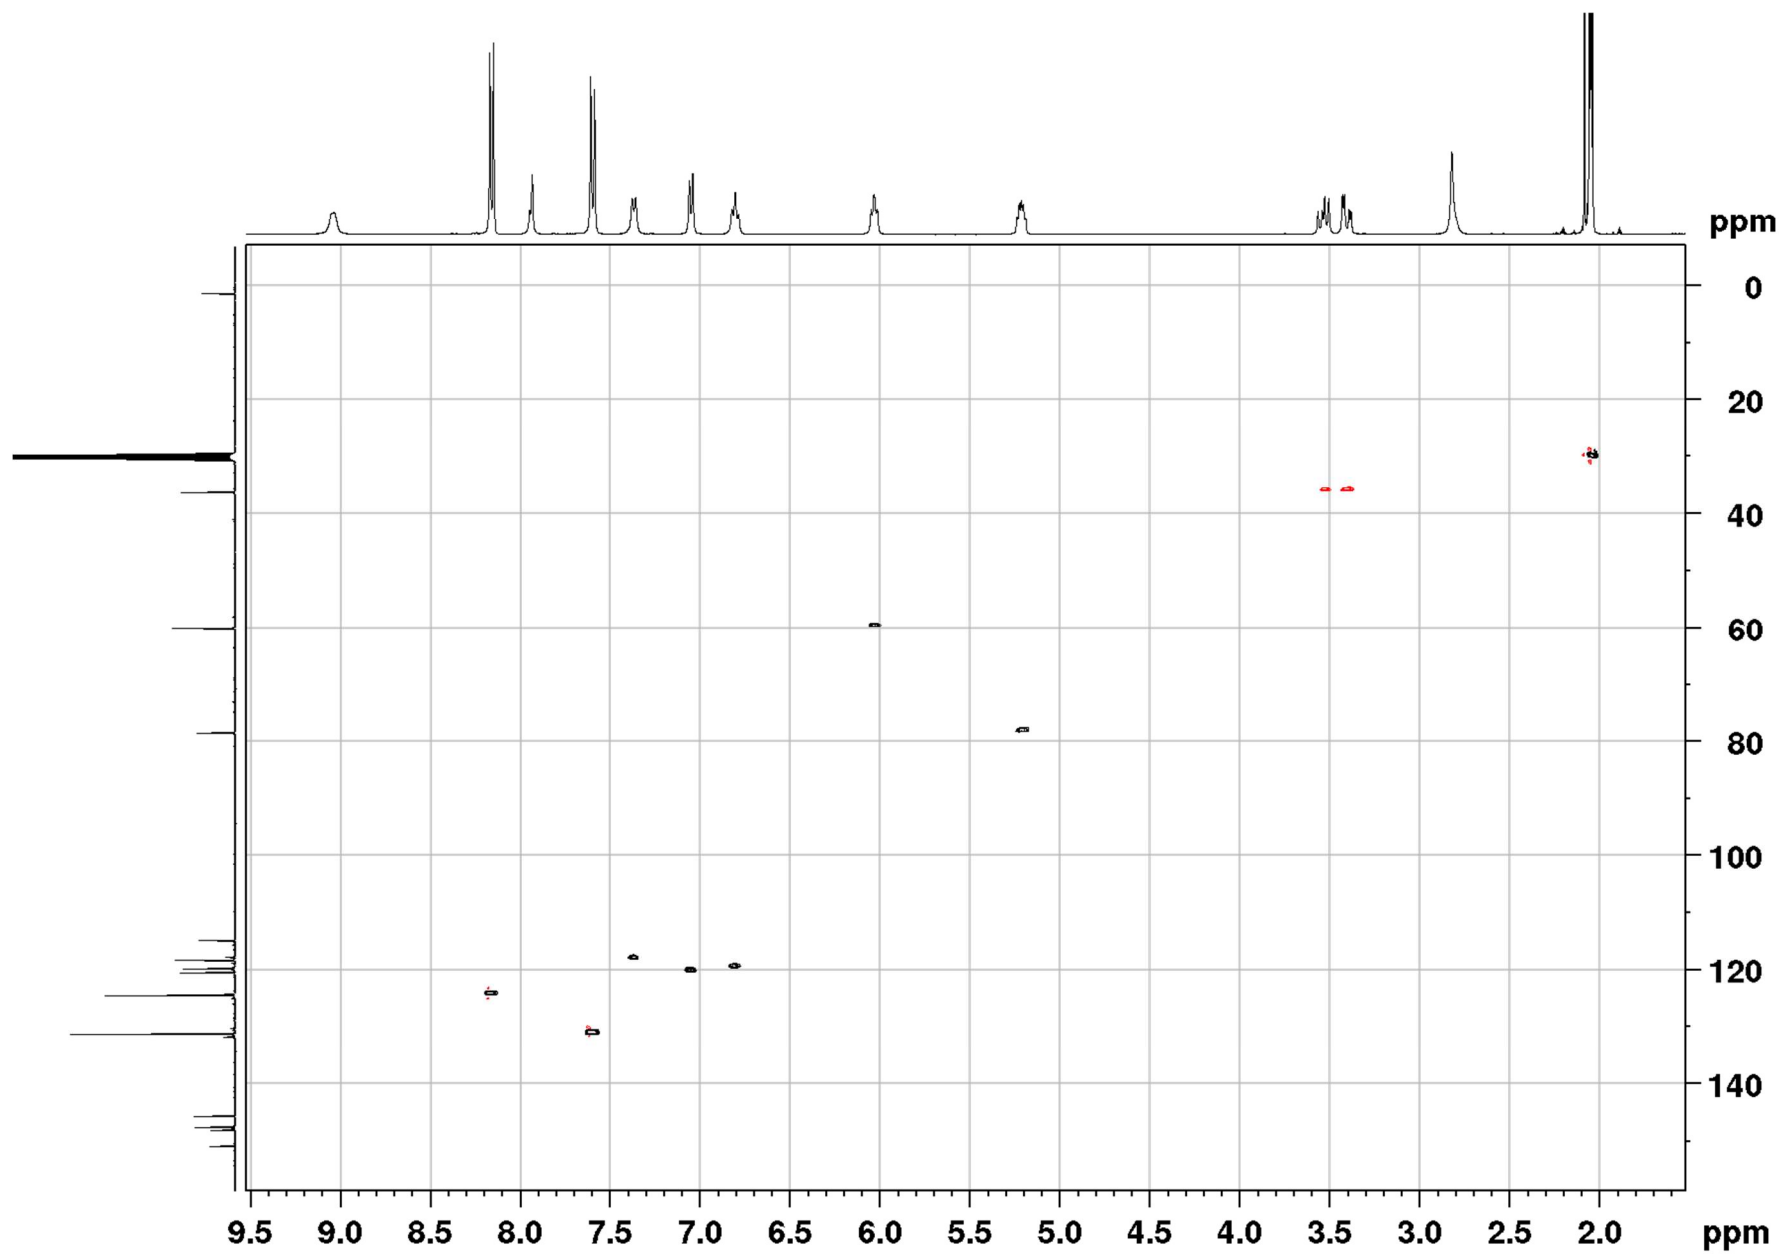

**Figure S22:** HSQC-edited NMR of **1** in acetone- $\text{d}_6$  at 298 K.

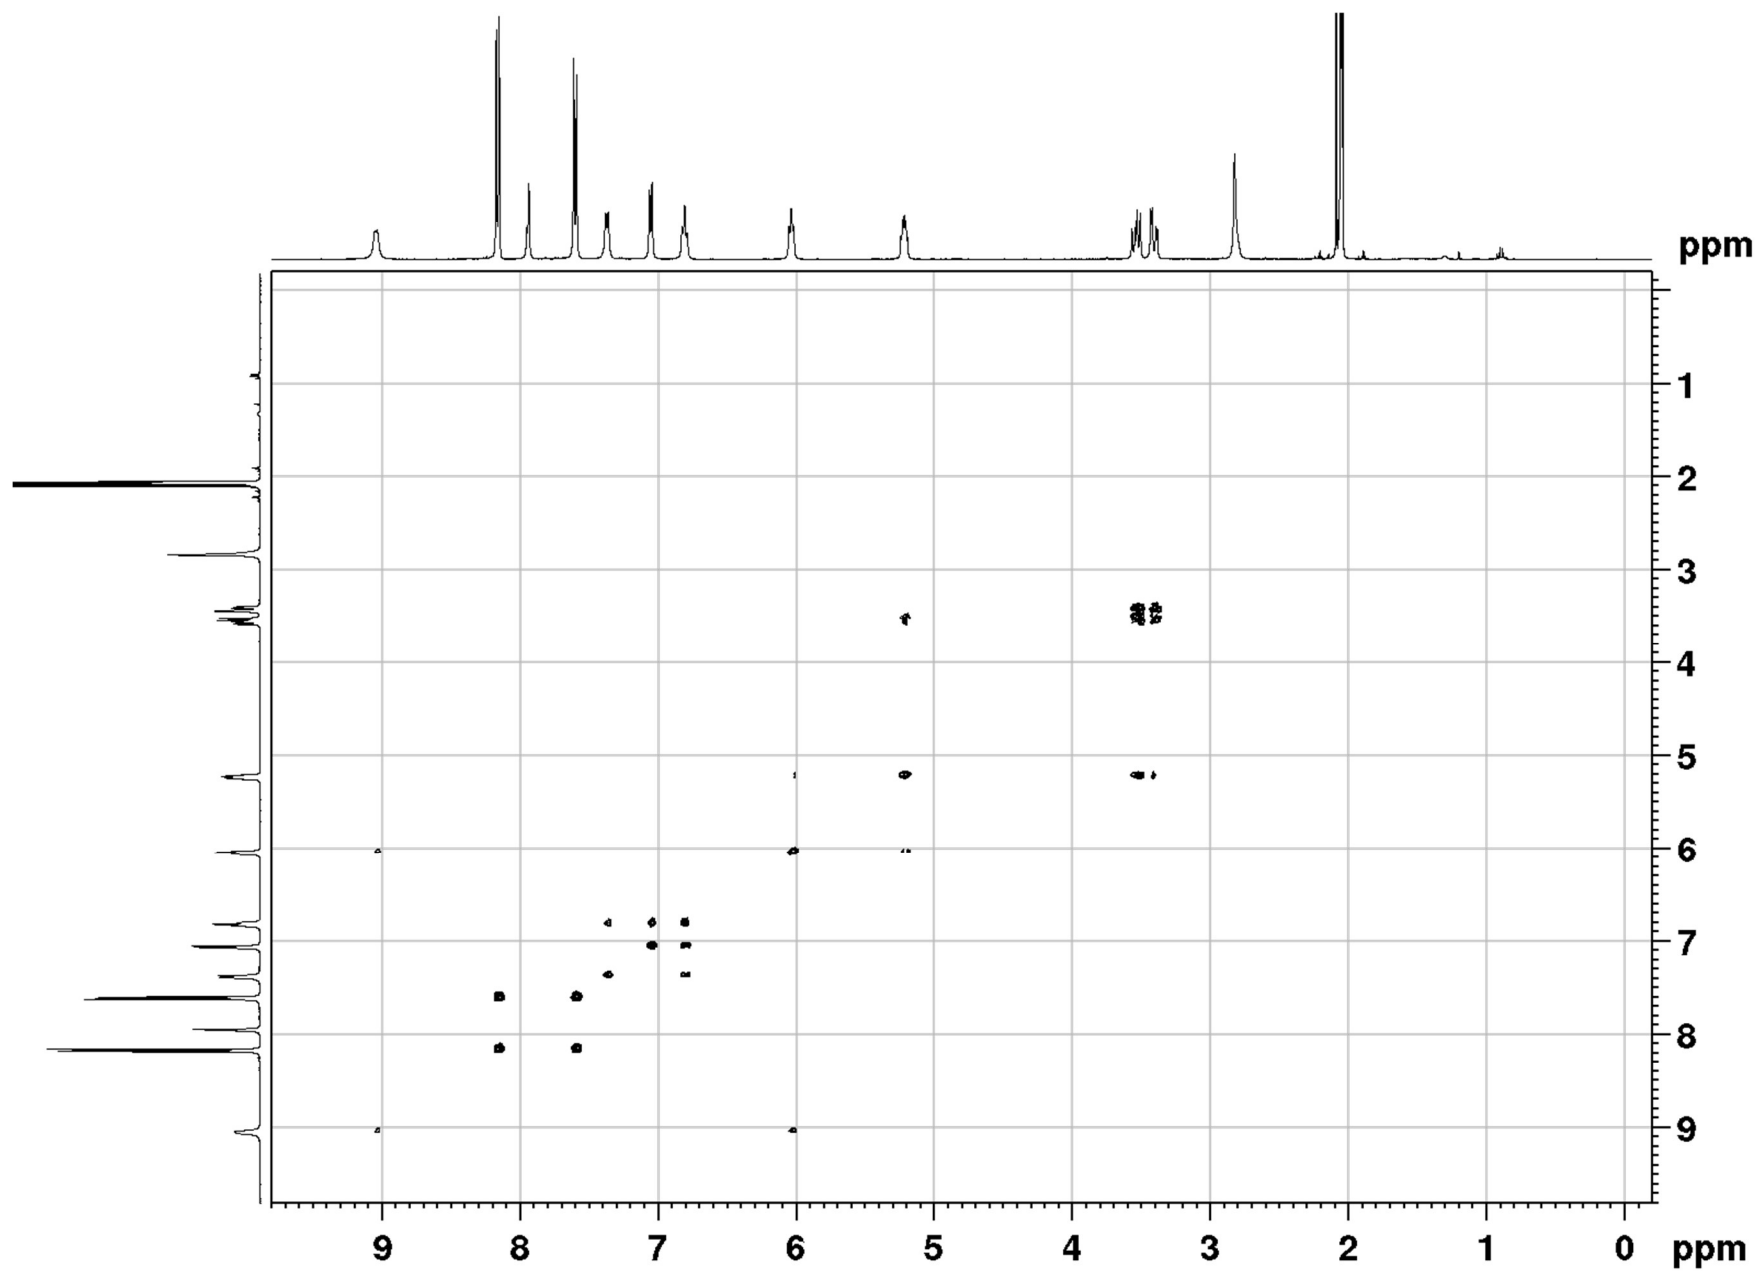

Figure S23: COSY NMR of **1** in acetone-d<sub>6</sub> at 298 K.

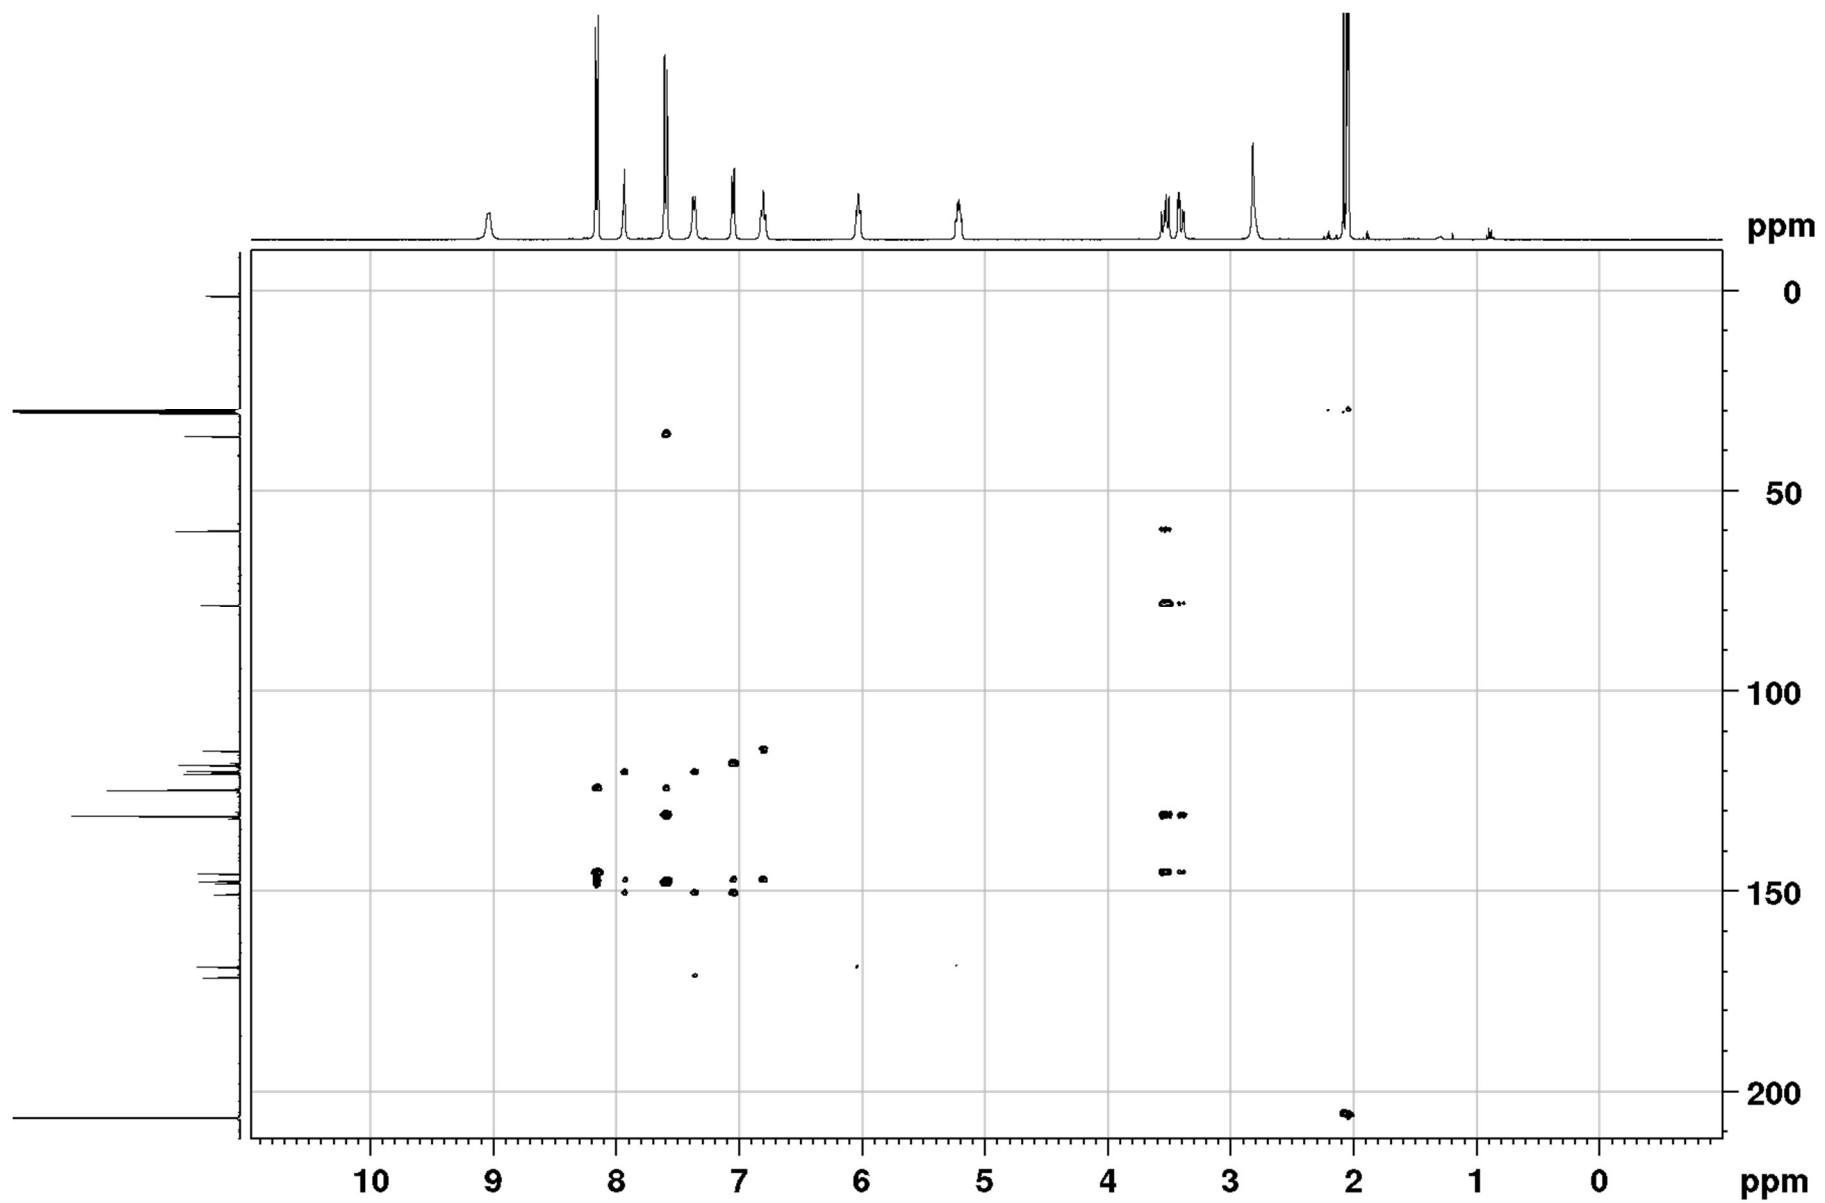

**Figure S24:** HMBC NMR of **1** in acetone- $\text{d}_6$  at 298 K.



## 2-HBA-obafluorin (2)

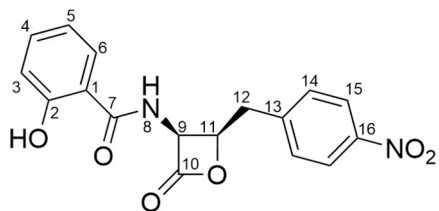

**Table S3:** Resonances assignment in  $^1\text{H}$  and  $^{13}\text{C}$  NMR spectra of **2** in acetone- $d_6$  at 298 K.

| Position | $\delta_{\text{H}}$ (no. of protons, multiplicity, $J$ in Hz) | $\delta_{\text{C}}$ | COSY    | HMBC           |
|----------|---------------------------------------------------------------|---------------------|---------|----------------|
| 1        |                                                               | 114.8               |         |                |
| 2        |                                                               | 162.2               |         |                |
| 3        | 6.92-6.92 (1H, m)*                                            | 118.9               | 4, 5, 6 | 1, 2 (weak), 5 |
| 4        | 7.52-7.46 (1H, m)                                             | 135.8               | 3, 5    | 2, 6           |
| 5        | 6.92-6.92 (1H, m)*                                            | 120.0               | 3, 4, 6 | 1, 3, 6 (weak) |
| 6        | 7.90-7.86 (1H, m)                                             | 128.3               | 3, 5    | 2, 4, 7        |
| 7        |                                                               | 170.9               |         |                |
| 8        | 9.07 (1H, d, 8.2)                                             |                     |         |                |
| 9        | 6.07-6.02 (1H, m)                                             | 59.8                | 8, 11   | 7, 10, 11      |
| 10       |                                                               | 168.9               |         |                |
| 11       | 5.26-5.19 (1H, m)                                             | 78.4                | 9, 12   | 10             |
| 12       | 3.54 (1H, dd, 14.8 & 9.3)<br>3.40 (1H, dd, 14.8 & 4.7)        | 36.2                | 11, 12  | 9, 11, 13, 14  |
| 13       |                                                               | 145.6               |         |                |
| 14       | 7.60 (2H, d, 8.8)                                             | 131.2               | 15      | 12, 14, 16     |
| 15       | 8.16 (2H, d, 8.8)                                             | 124.4               | 14      | 13, 15, 16     |
| 16       |                                                               | 148.0               |         |                |
| 2-OH     | 11.78 (1H, s)                                                 |                     |         |                |

\*H-3 and H-5 are under the same signal.

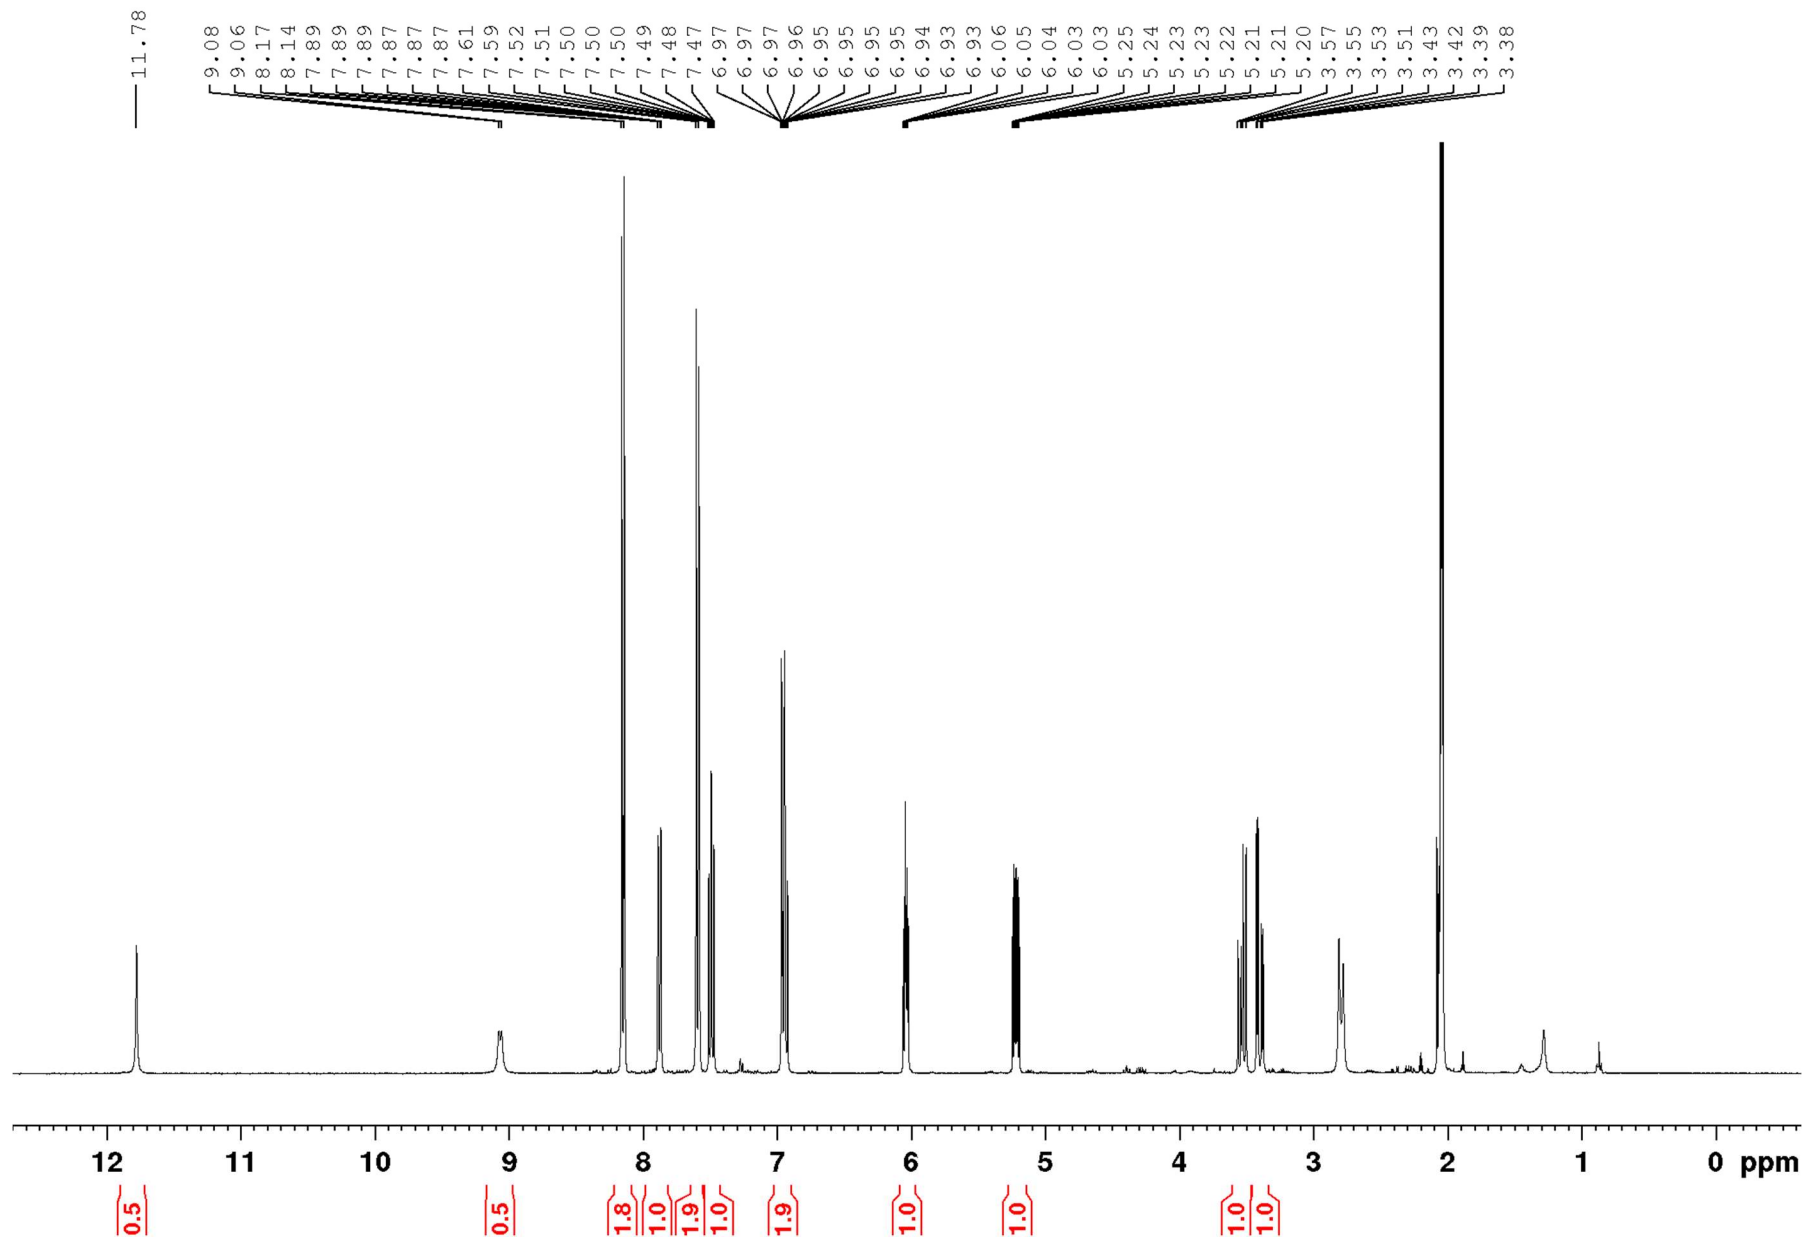

Figure S25:  $^1\text{H}$  NMR of **2** in acetone- $\text{d}_6$  at 298 K.

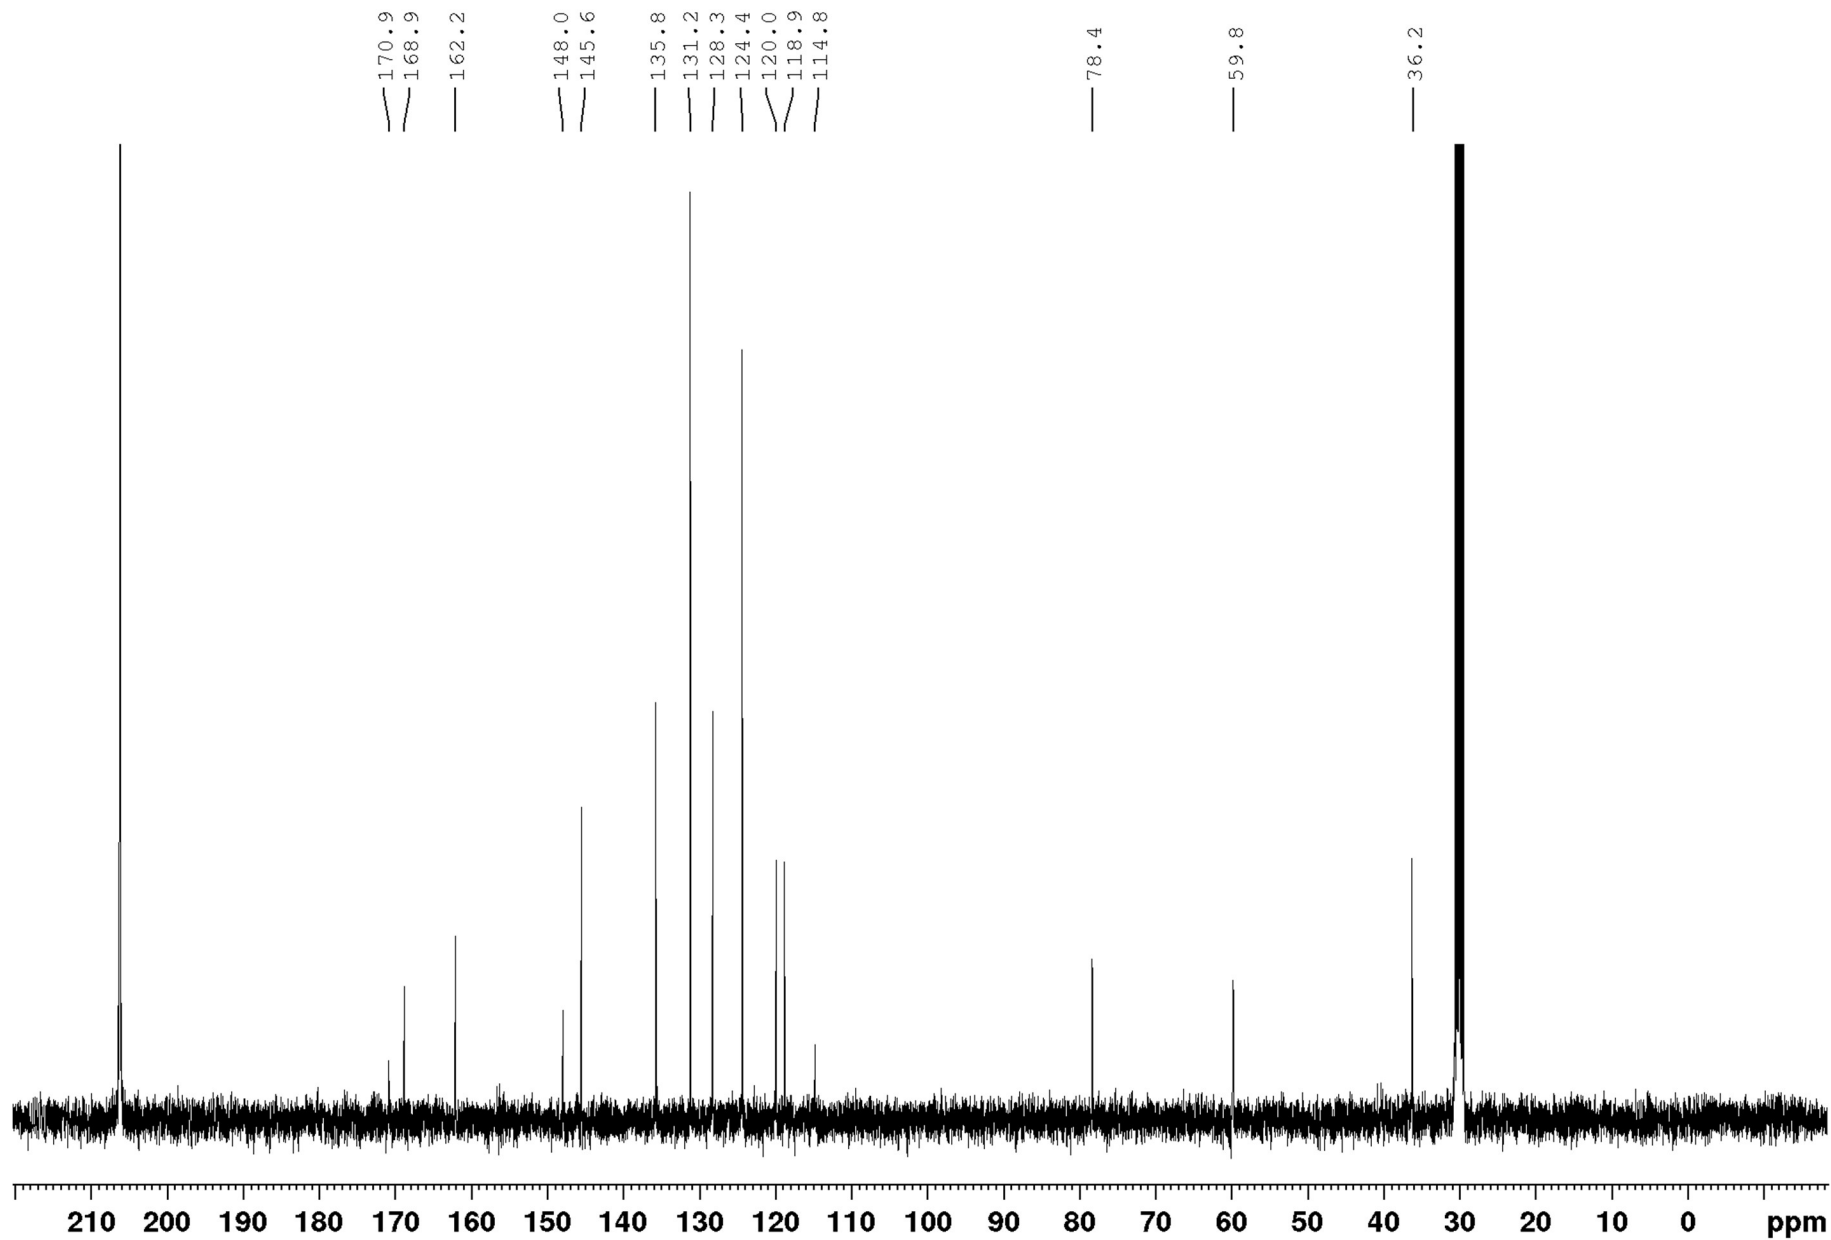

Figure S26:  $^{13}\text{C}$  NMR for **2** in acetone- $\text{d}_6$  at 298 K.

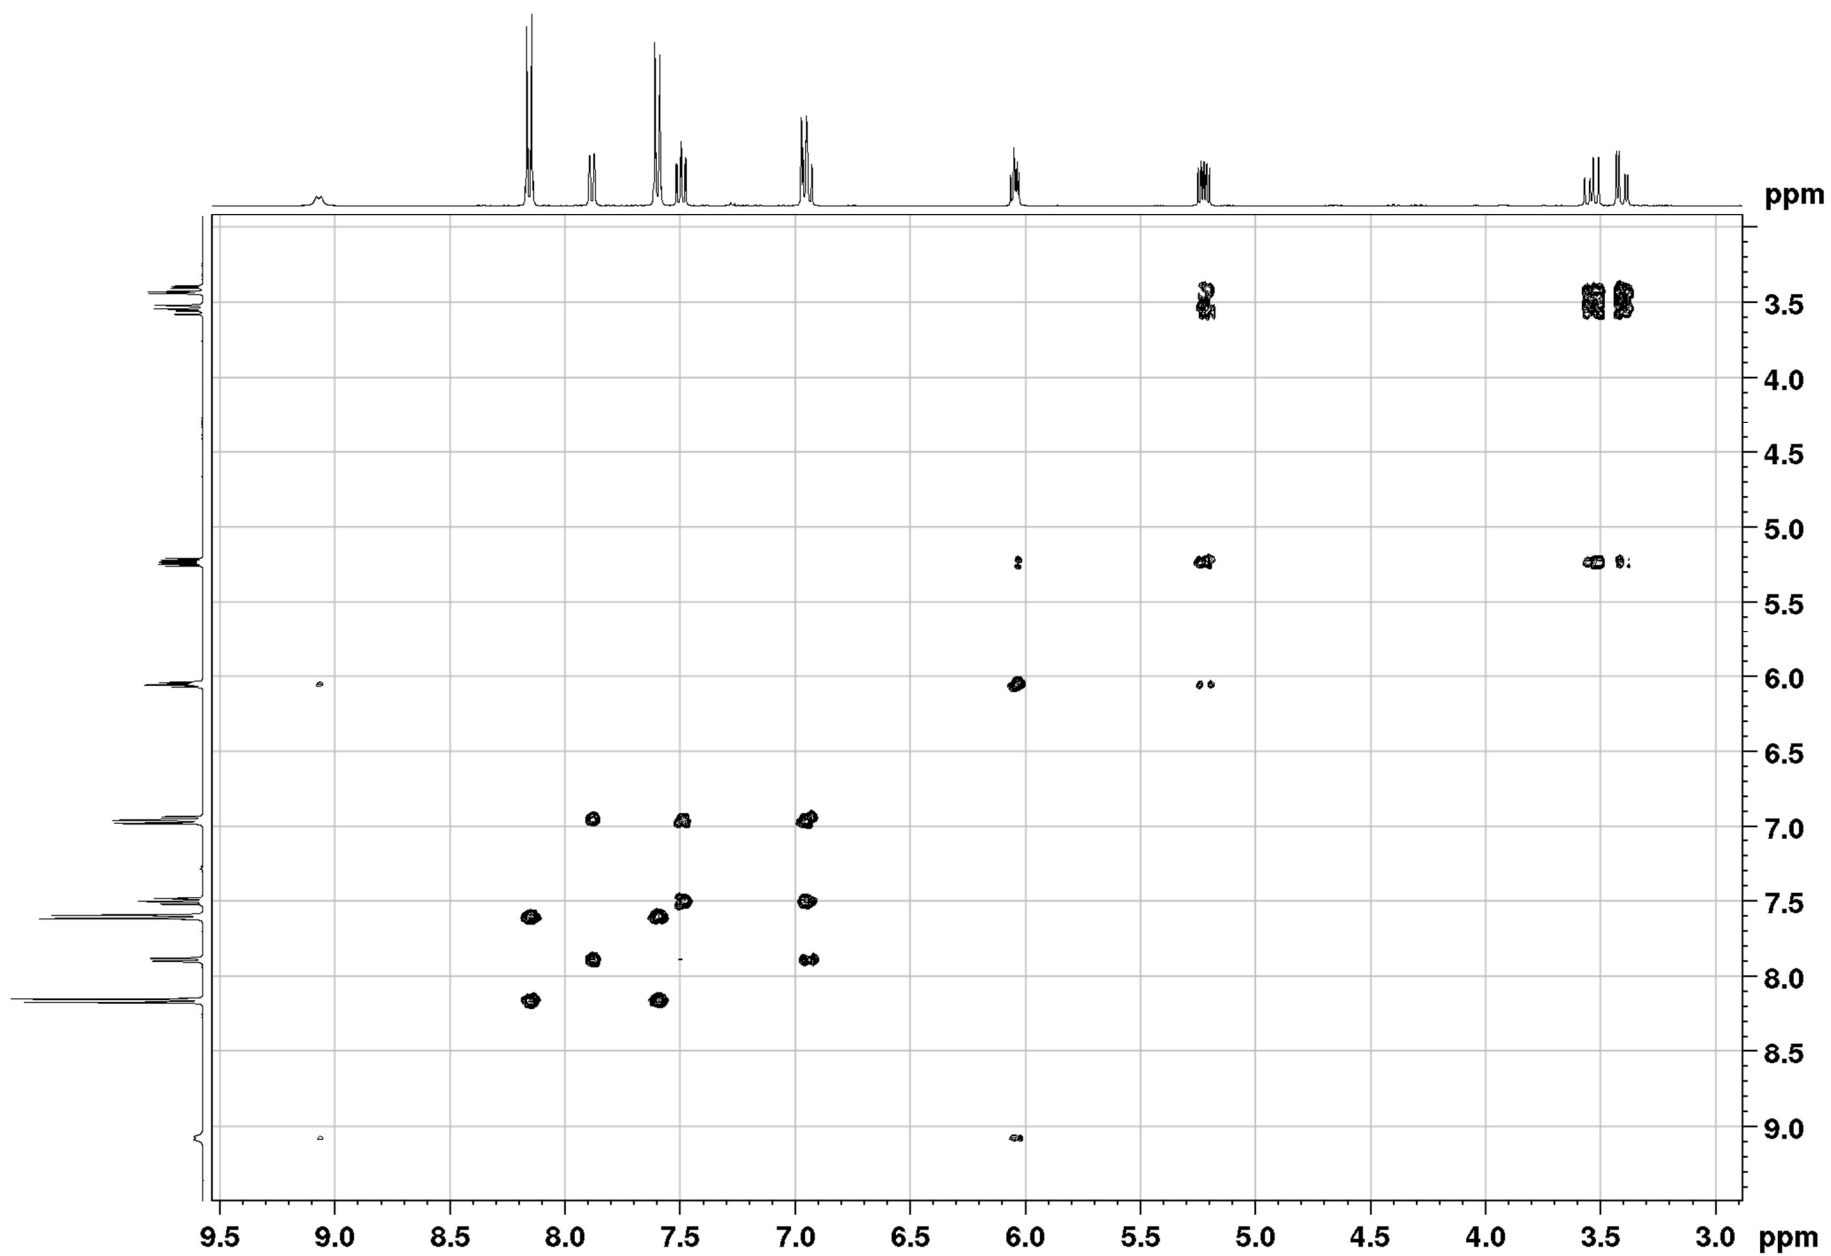

Figure S27: COSY NMR of **2** in acetone-d<sub>6</sub> at 298 K.

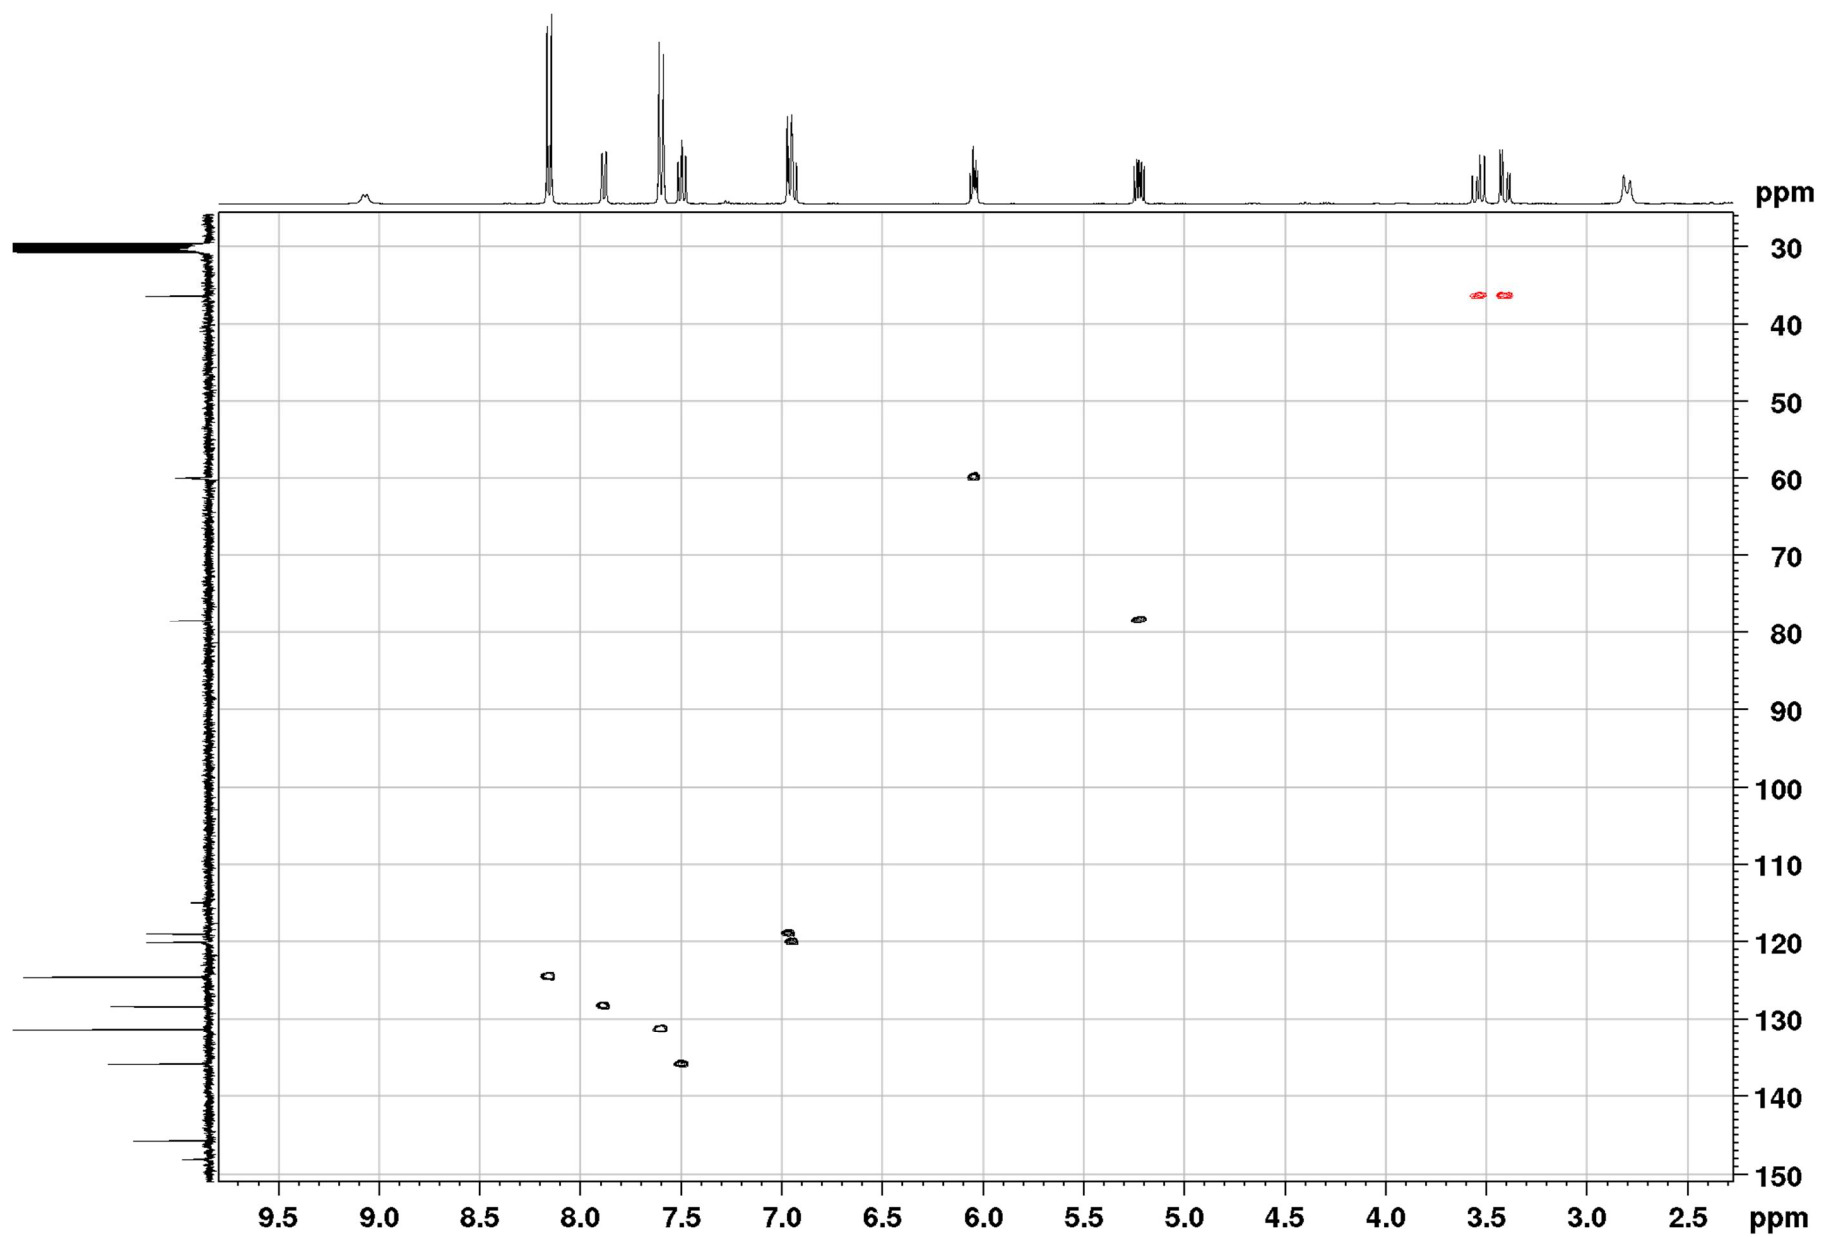

Figure S28: HSQC-edited NMR of **2** in acetone- $\text{d}_6$  at 298 K.

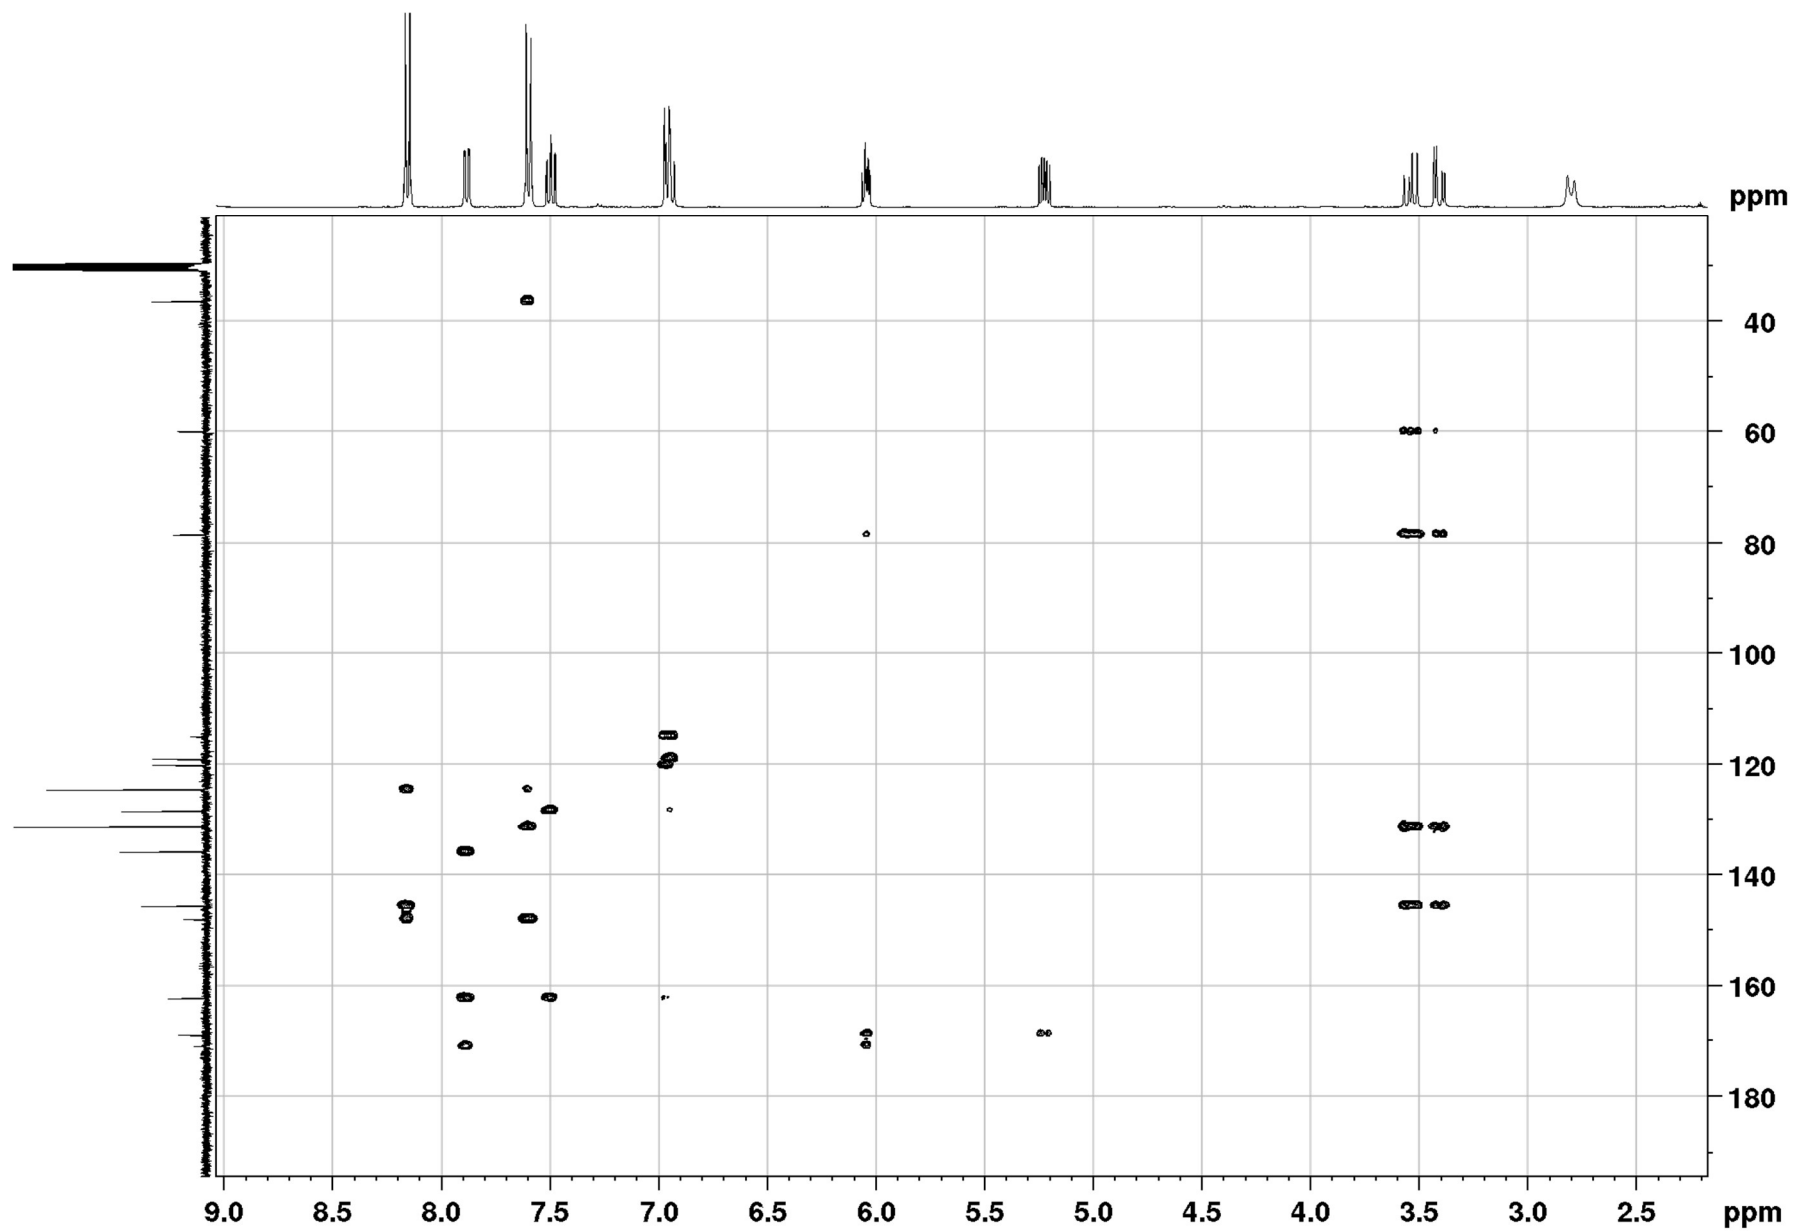

Figure S29: HMBC NMR of **2** in acetone- $\text{d}_6$  at 298 K.

### 3-HBA-obafluorin (3)

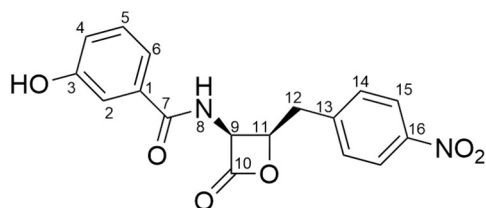

**Table S4:** Resonances assignment in  $^1\text{H}$  and  $^{13}\text{C}$  NMR spectra of **3** in acetone- $d_6$  at 298 K.

| Position | $\delta_{\text{H}}$ (no. of protons, multiplicity, $J$ in Hz) | $\delta_{\text{C}}$ | COSY    | HMBC           |
|----------|---------------------------------------------------------------|---------------------|---------|----------------|
| 1        |                                                               | 135.7               |         |                |
| 2        | 7.42-7.39 (1H, m)**                                           | 115.4               | 4, 5, 6 | 3, 4, 6, 7     |
| 3        |                                                               | 158.6               |         |                |
| 4        | 7.06 (1H, ddd, 8.1 & 2.5 & 1.1)                               | 120.0               | 2, 5, 6 | 2, 6           |
| 5        | 7.33 (1H, dd, 8.1 & 8.1)                                      | 130.7               | 2, 4, 6 | 1, 3           |
| 6        | 7.42-7.39 (1H, m)**                                           | 119.3               | 2, 4, 5 | 2, 3, 4, 7     |
| 7        |                                                               | 167.6               |         |                |
| 8        | 8.70-8.65 (1H, m)*                                            |                     | 9       |                |
| 9        | 6.00-5.96 (1H, m)                                             | 60.4                | 8, 11   | 7, 10          |
| 10       |                                                               | 169.5               |         |                |
| 11       | 5.19-5.12 (1H, m)                                             | 78.5                | 9, 12   | 10             |
| 12       | 3.52 (1H, dd, 14.9 & 9.2)<br>3.38 (1H, dd, 14.9 & 4.6)        | 36.2                | 11, 12  | 9, 12, 13, 14  |
| 13       |                                                               | 145.9               |         |                |
| 14       | 7.60 (2H, d, 8.8)                                             | 131.3               | 15      | 12, 13, 14, 15 |
| 15       | 8.17 (2H, d, 8.8)                                             | 124.5               | 14      | 13, 15, 16     |
| 16       |                                                               | 148.0               |         |                |
| 3-OH     | 8.70-8.65 (1H, m)*                                            |                     |         |                |

\* H-8 and 3-OH are both under the same signal

\*\* H-6 and H-2 are both under the same signal



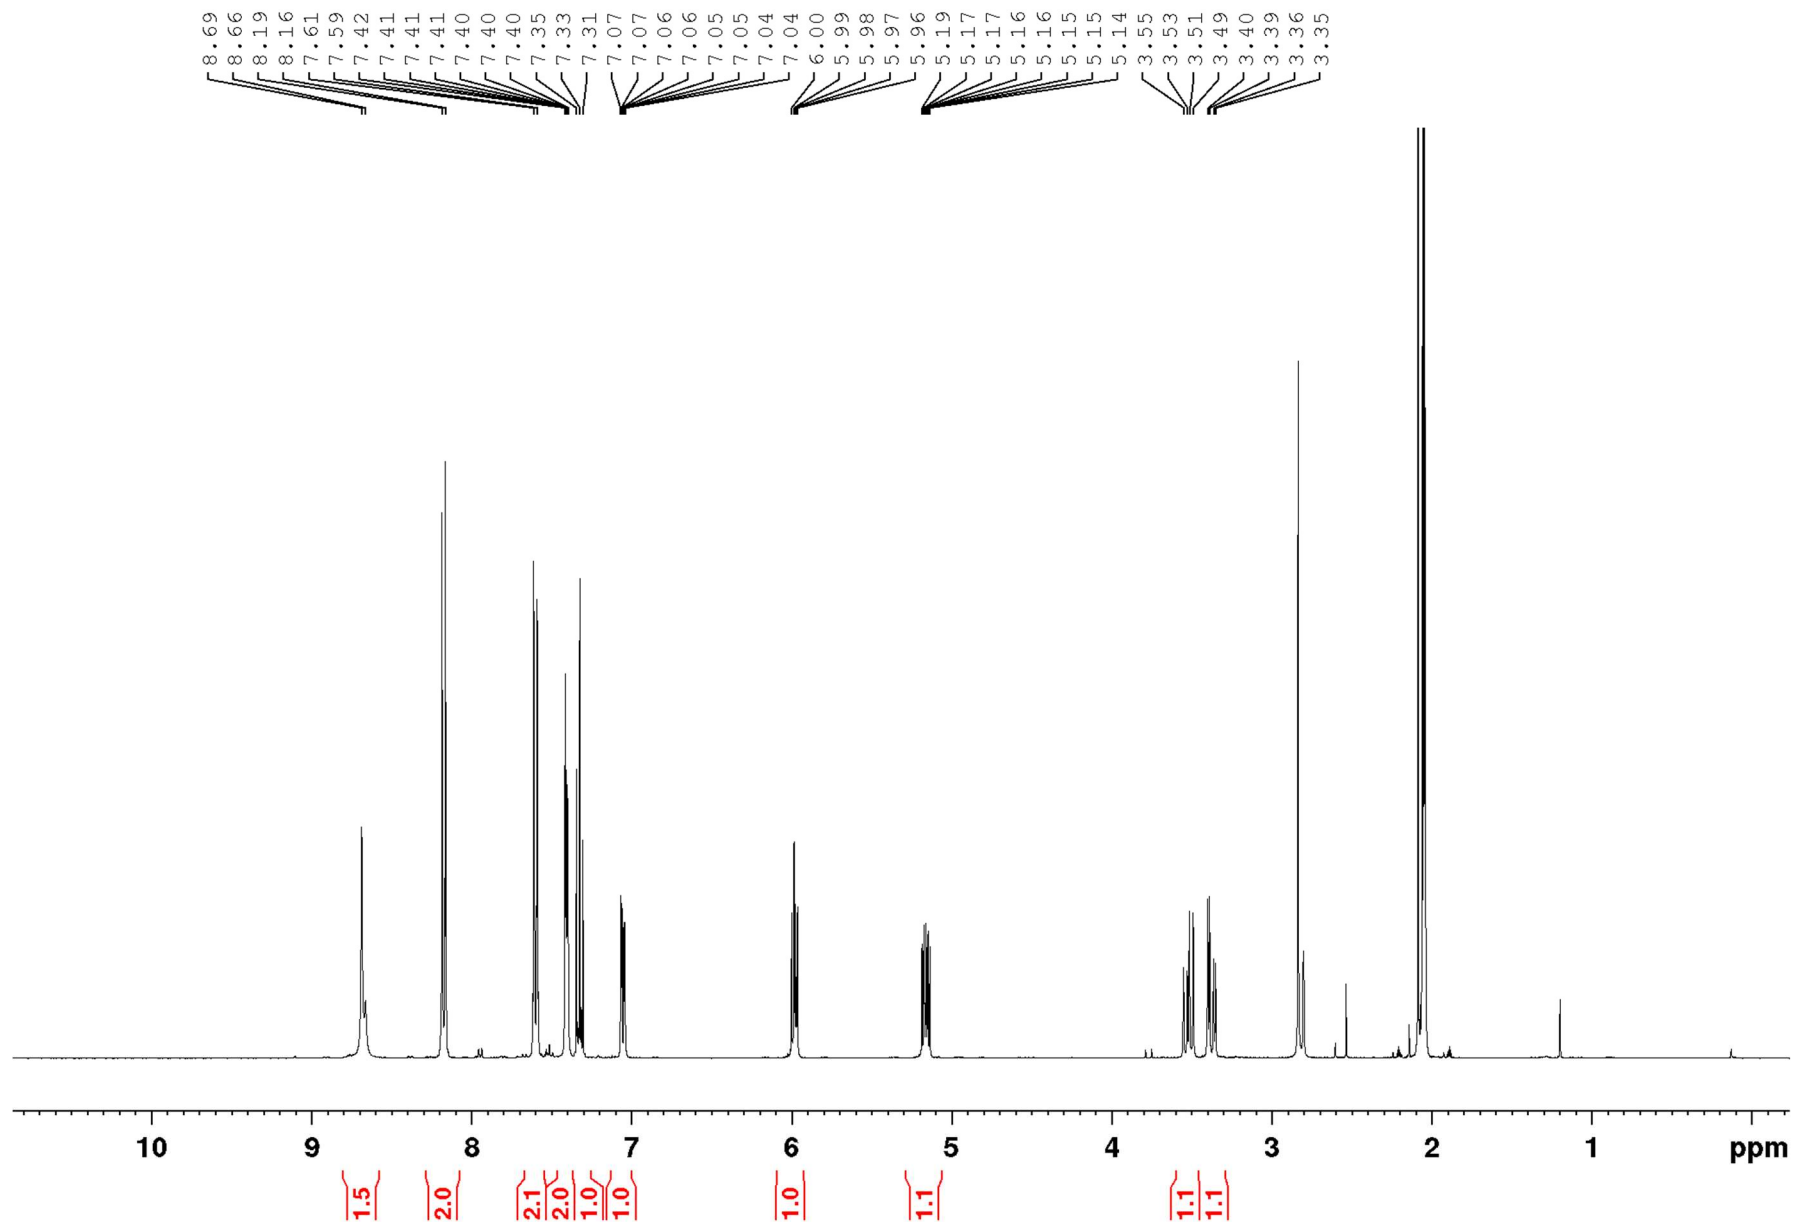

Figure S30:  $^1\text{H}$  NMR of **3** in acetone- $\text{d}_6$  at 298 K.

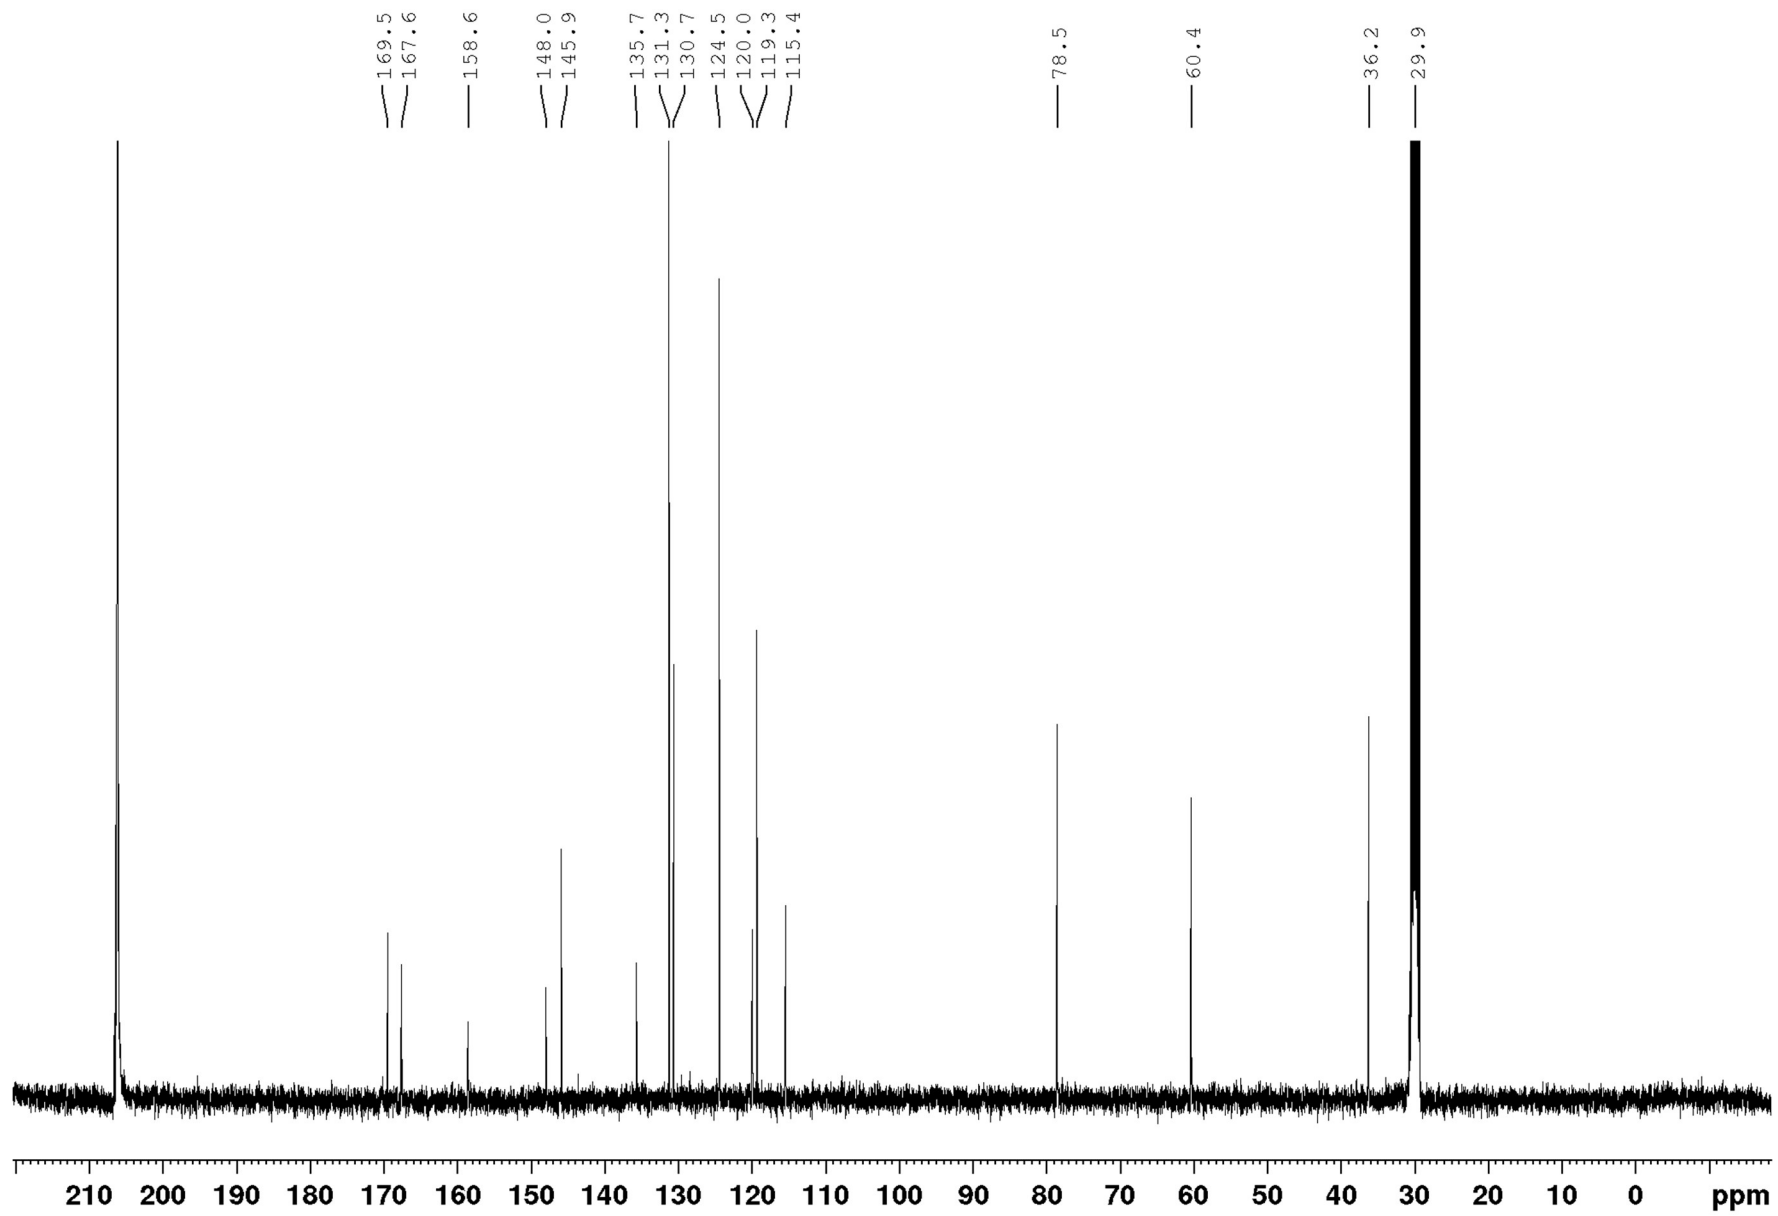

Figure S31:  $^{13}\text{C}$  NMR of 3 in acetone- $\text{d}_6$  at 298 K.

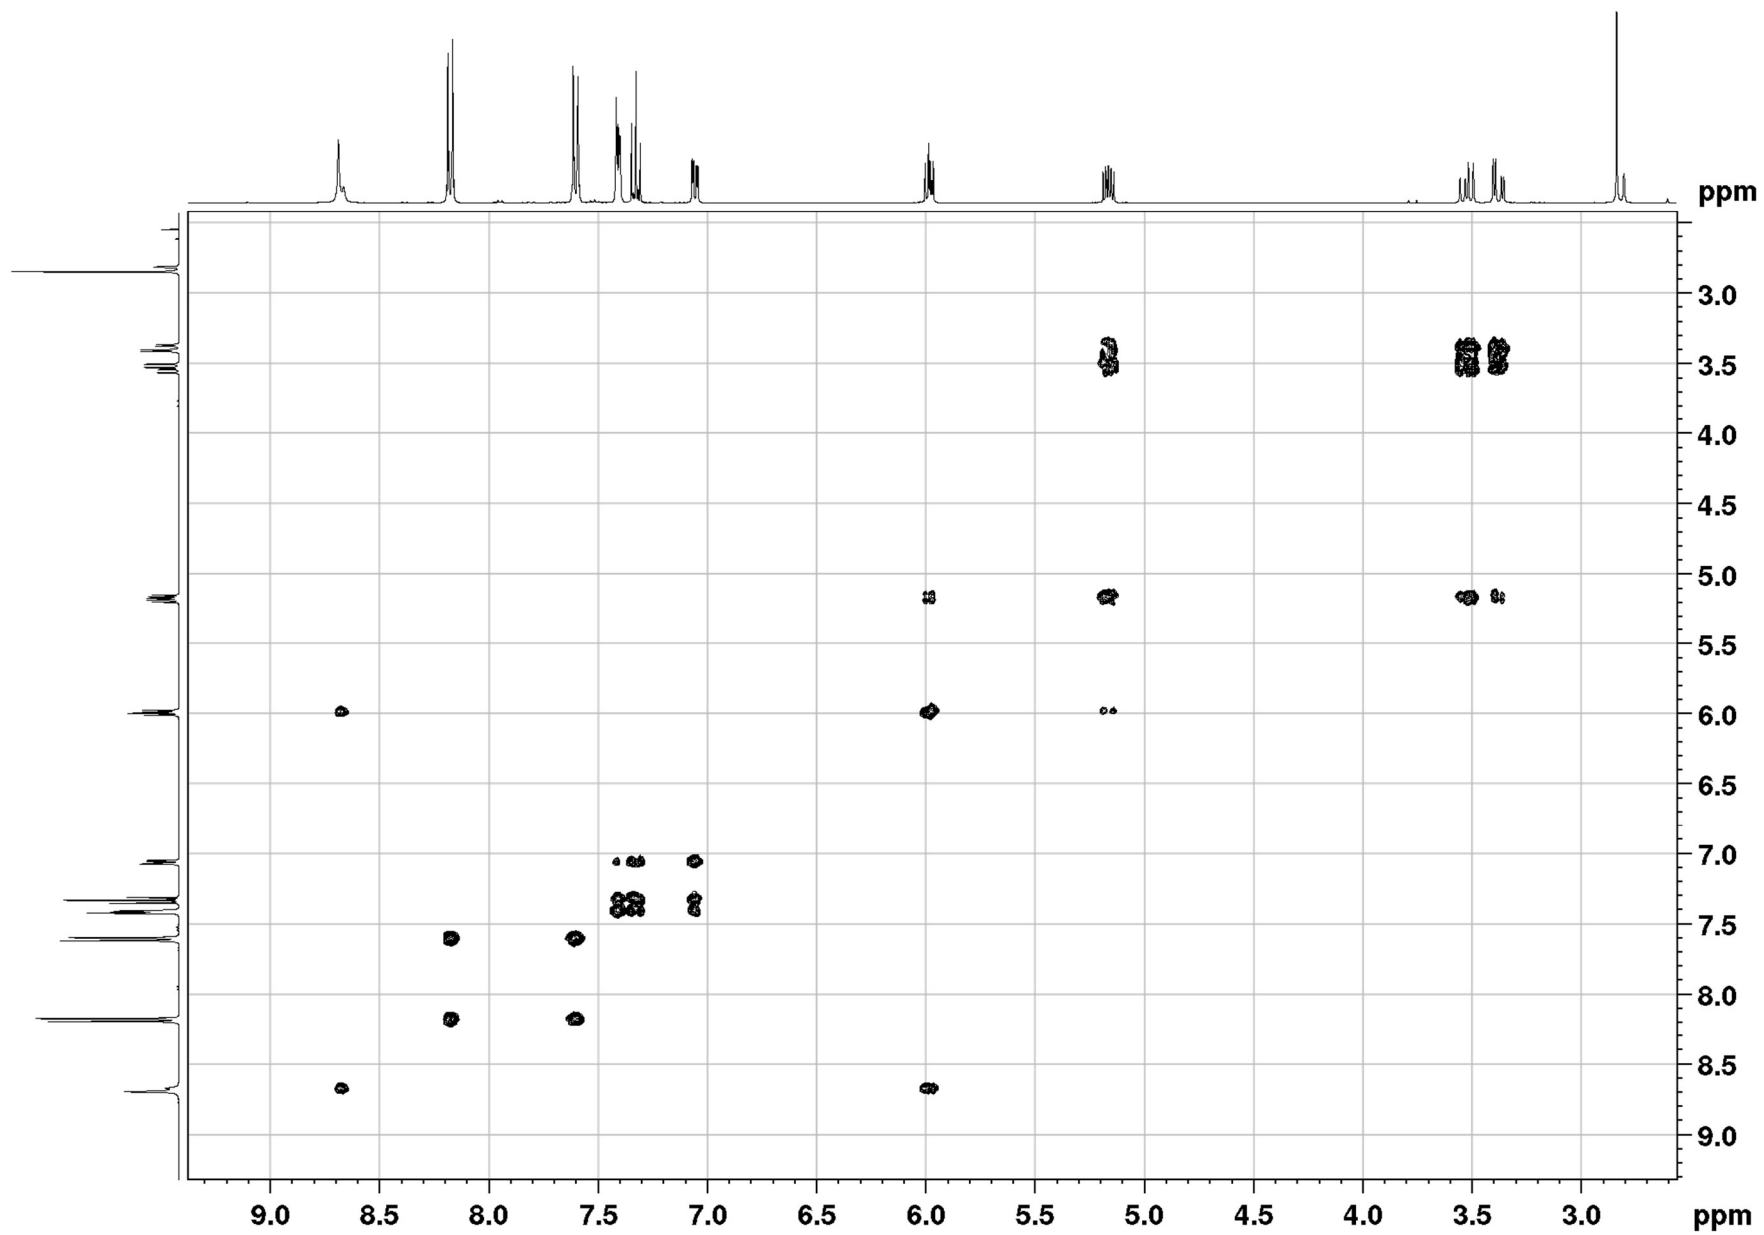

Figure S32: COSY NMR of **3** in acetone- $d_6$  at 298 K.

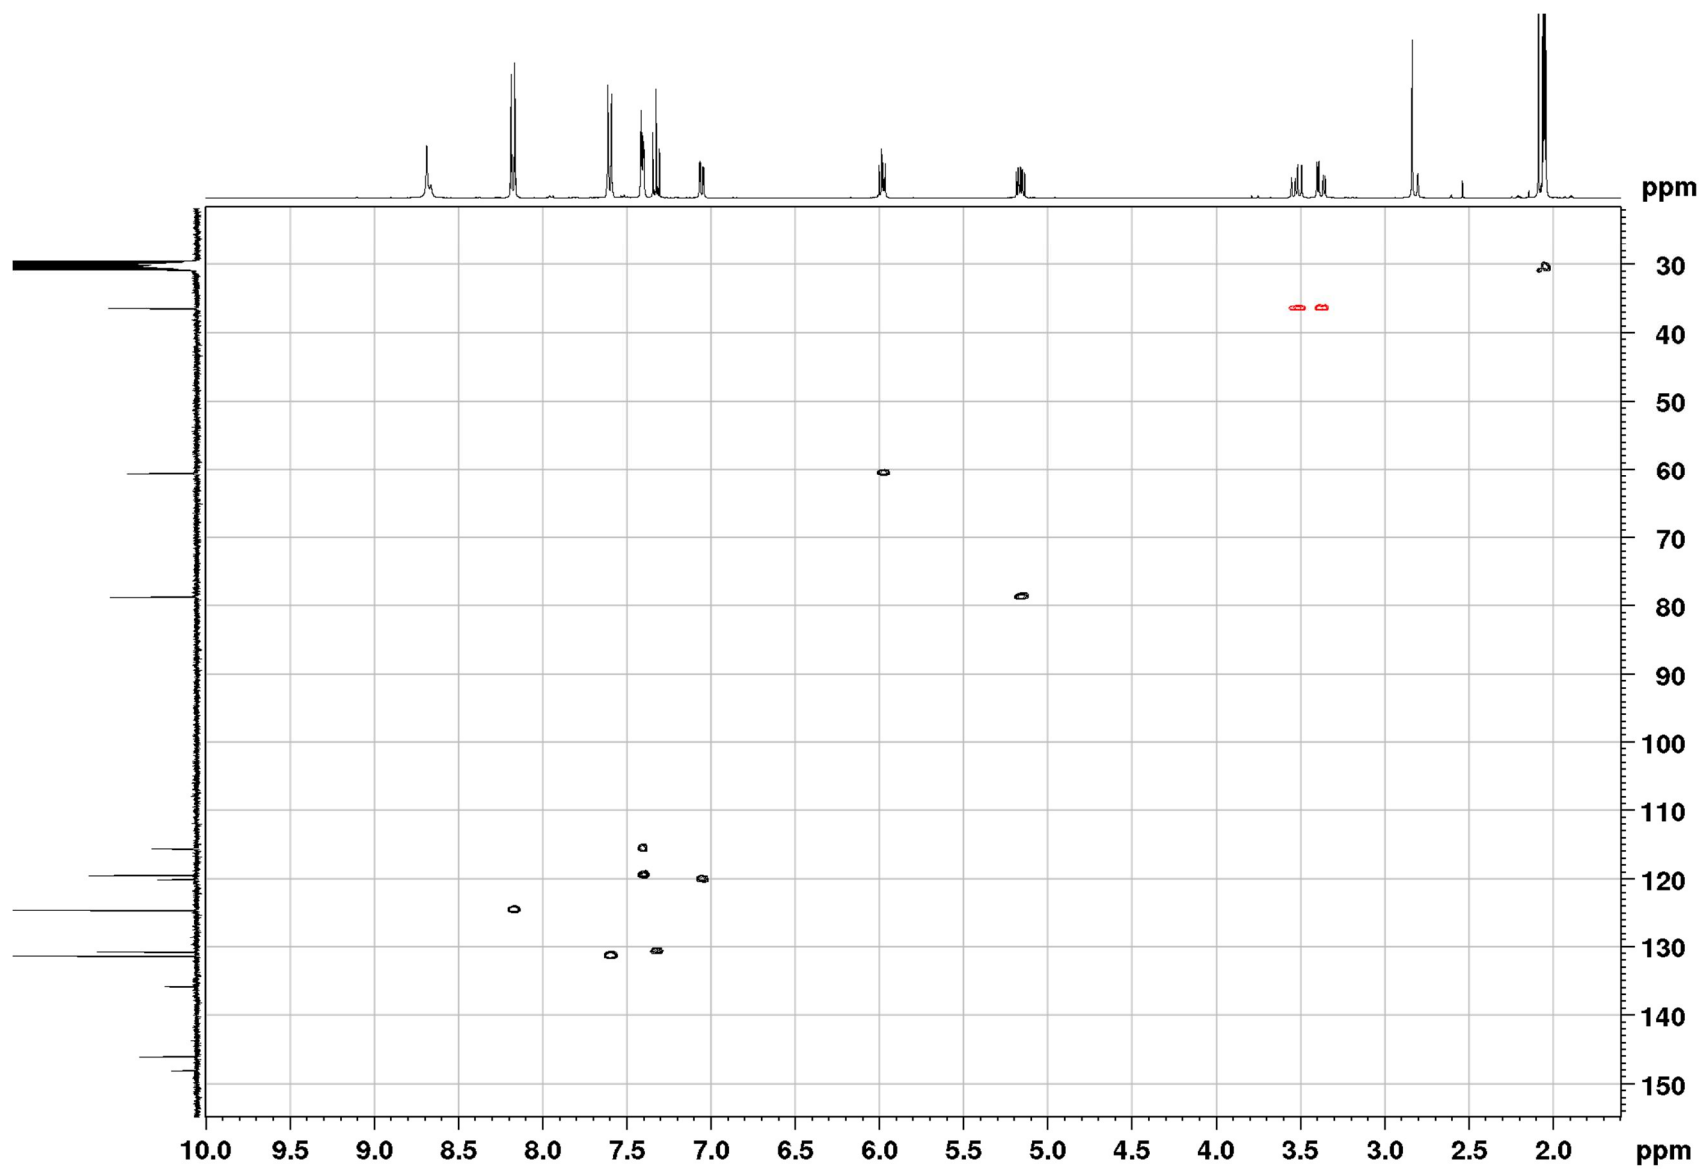

Figure S33: HSQC-edited NMR of **3** in acetone- $\text{d}_6$  at 298 K.

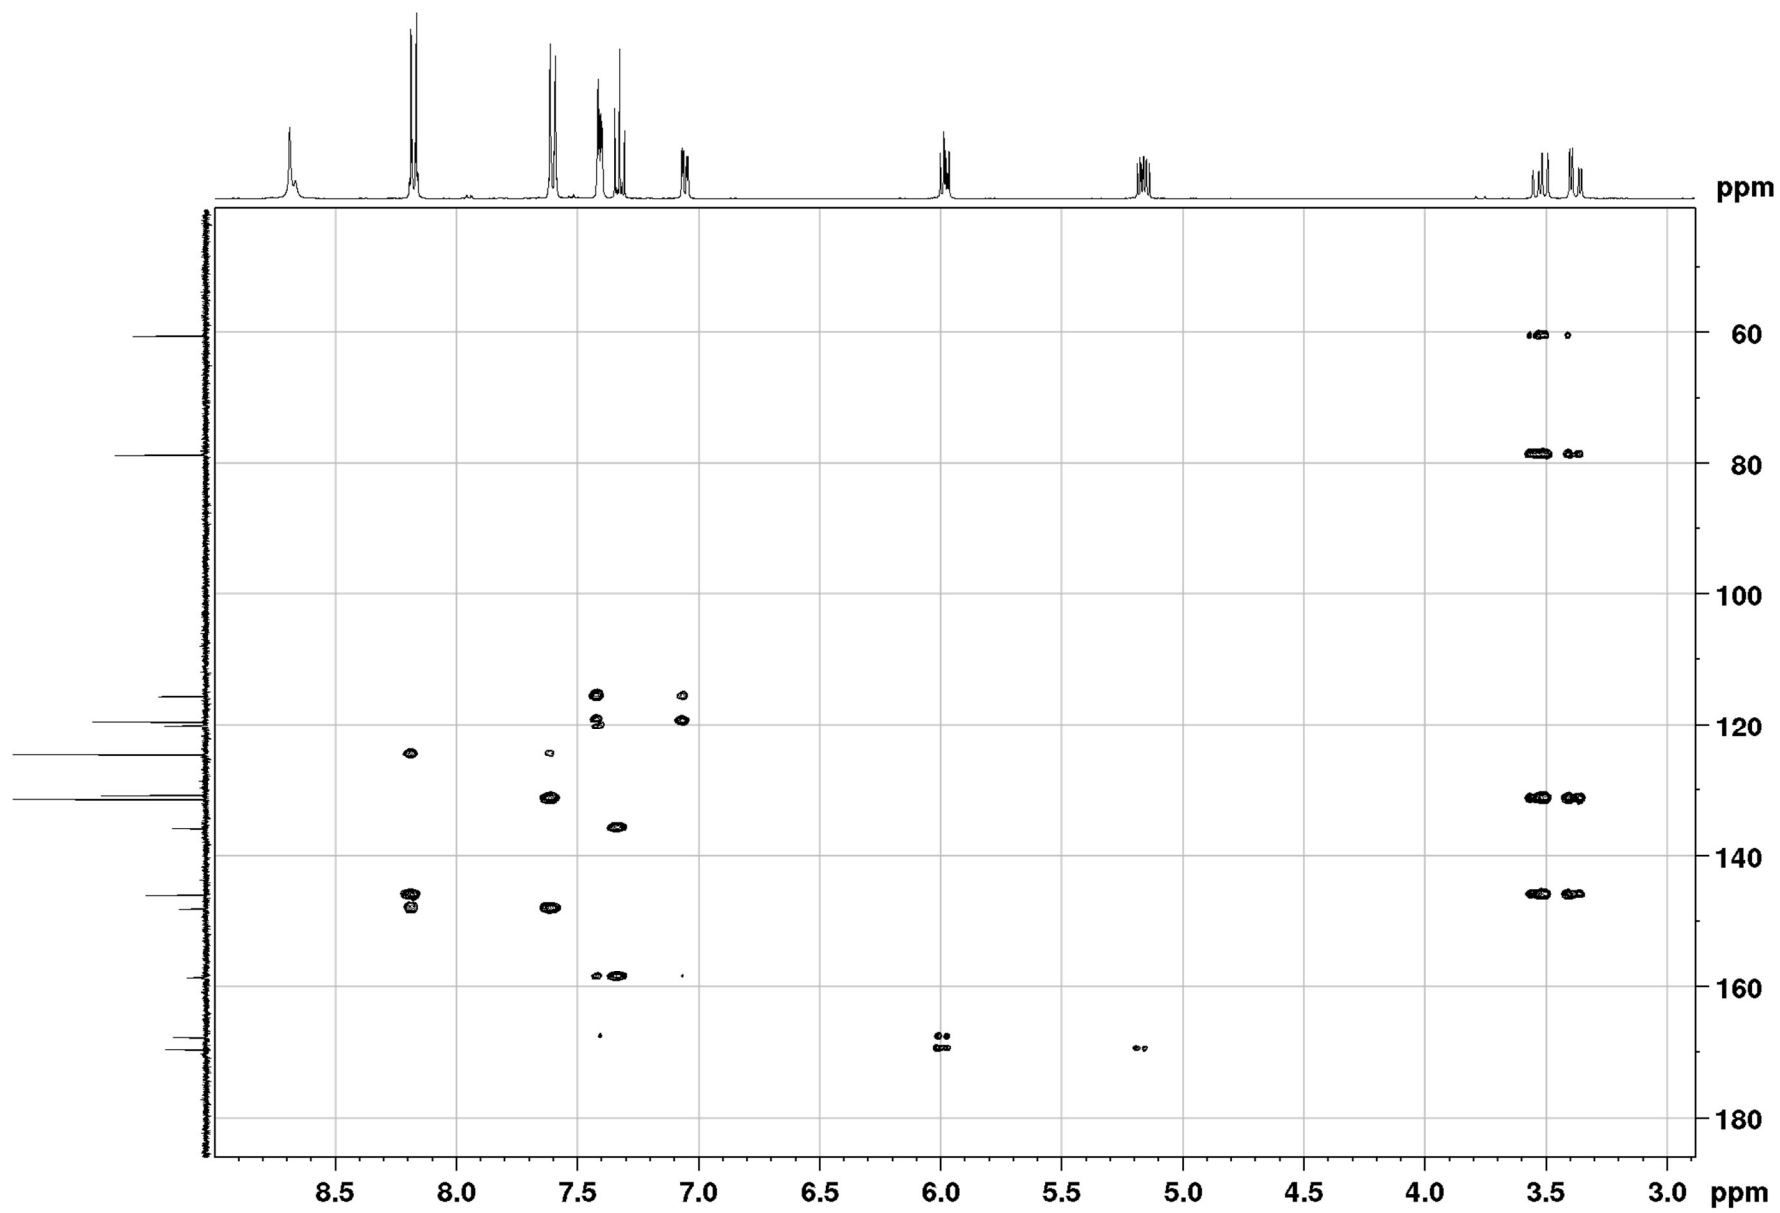

Figure S34: HMBC of 3 in acetone-d<sub>6</sub> at 298 K.

## BA-obafluorin (4)

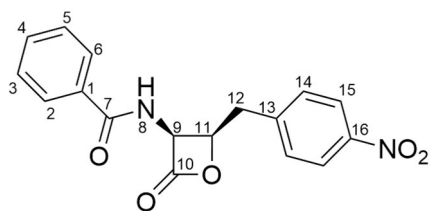

**Table S5:** Resonances assignment in  $^1\text{H}$  and  $^{13}\text{C}$  NMR spectra of **4** in acetone- $d_6$  at 298 K.

| Position | $\delta_{\text{H}}$ (no. of protons, multiplicity, $J$ in Hz) | $\delta_{\text{C}}$ | COSY $^1\text{H}$ - $^1\text{H}$ | HMBC $^1\text{H}$ - $^{13}\text{C}$ |
|----------|---------------------------------------------------------------|---------------------|----------------------------------|-------------------------------------|
| 1        |                                                               | 134.2               |                                  |                                     |
| 2/6      | 7.95 (2H, d, 7.3 Hz)                                          | 128.4               | 3/5                              | 2/6, 4, 7                           |
| 3/5      | 7.52 (2H, dd, 7.3, 7.6)                                       | 129.5               | 2/6, 4                           | 1, 3/5                              |
| 4        | 7.62-7.58 (1H, m)*                                            | 133.0               | 3/5                              | 2/6, 14                             |
| 7        |                                                               | 167.6               |                                  |                                     |
| 8        | 8.75 (1H, d, 8.1)                                             |                     | 9                                |                                     |
| 9        | 6.03-5.96 (1H, m)                                             | 60.3                | 8, 11                            | 7, 10, 11                           |
| 10       |                                                               | 169.4               |                                  | 10                                  |
| 11       | 5.20-5.15 (1H, m)                                             | 78.5                | 9, 12                            |                                     |
| 12       | 3.53 (1H, dd, 15.0 & 9.4)<br>3.38 (1H, dd, 15.0 & 4.5)        | 36.2                | 11, 12                           | 9, 11, 13, 14                       |
| 13       |                                                               | 145.9               |                                  |                                     |
| 14       | 7.60 (2H, d, 8.7)                                             | 131.3               | 15                               | 12, 16                              |
| 15       | 8.17 (2H, d, 8.7)                                             | 124.4               | 14                               | 13, 15, 16                          |
| 16       |                                                               | 148.0               |                                  |                                     |

\*under the signal for H-14

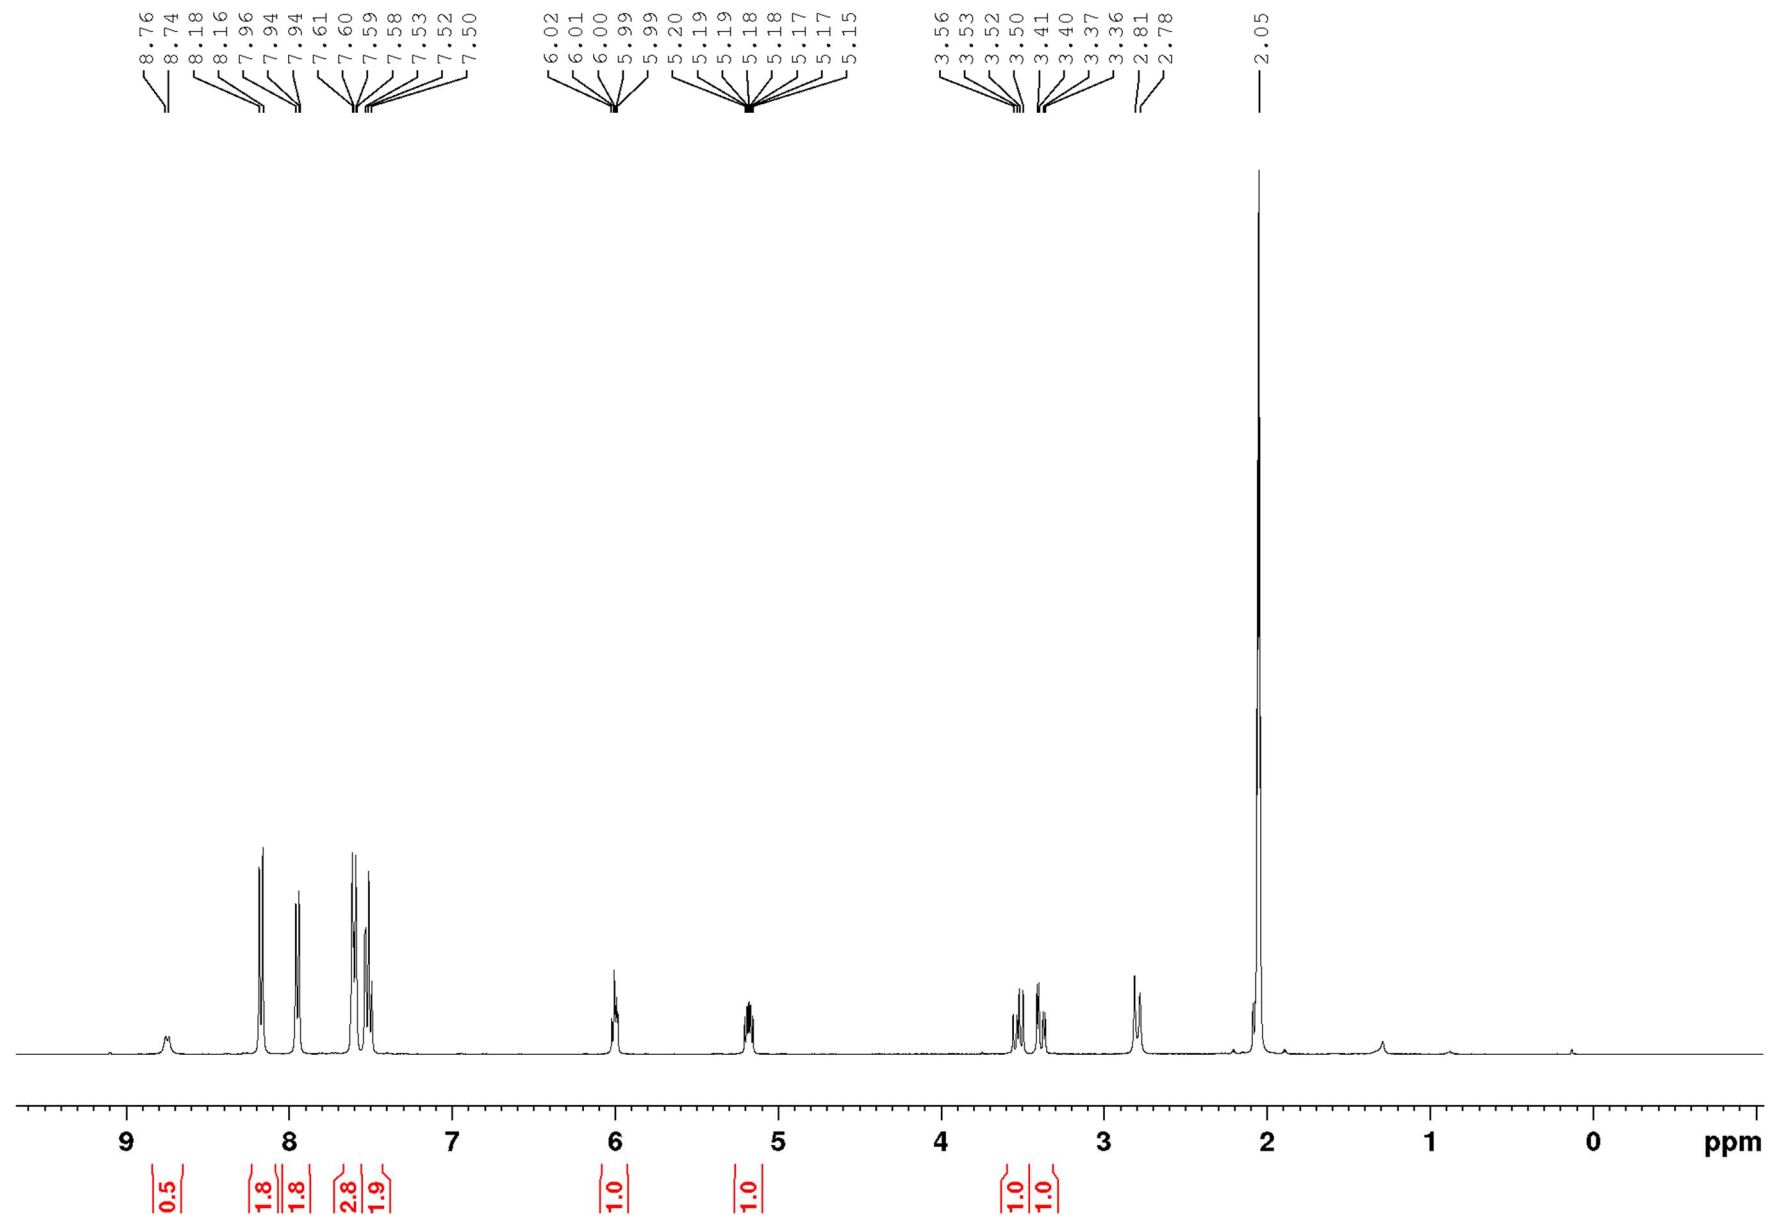

Figure S35:  $^1\text{H}$  NMR of **4** in acetone- $\text{d}_6$  at 298 K.



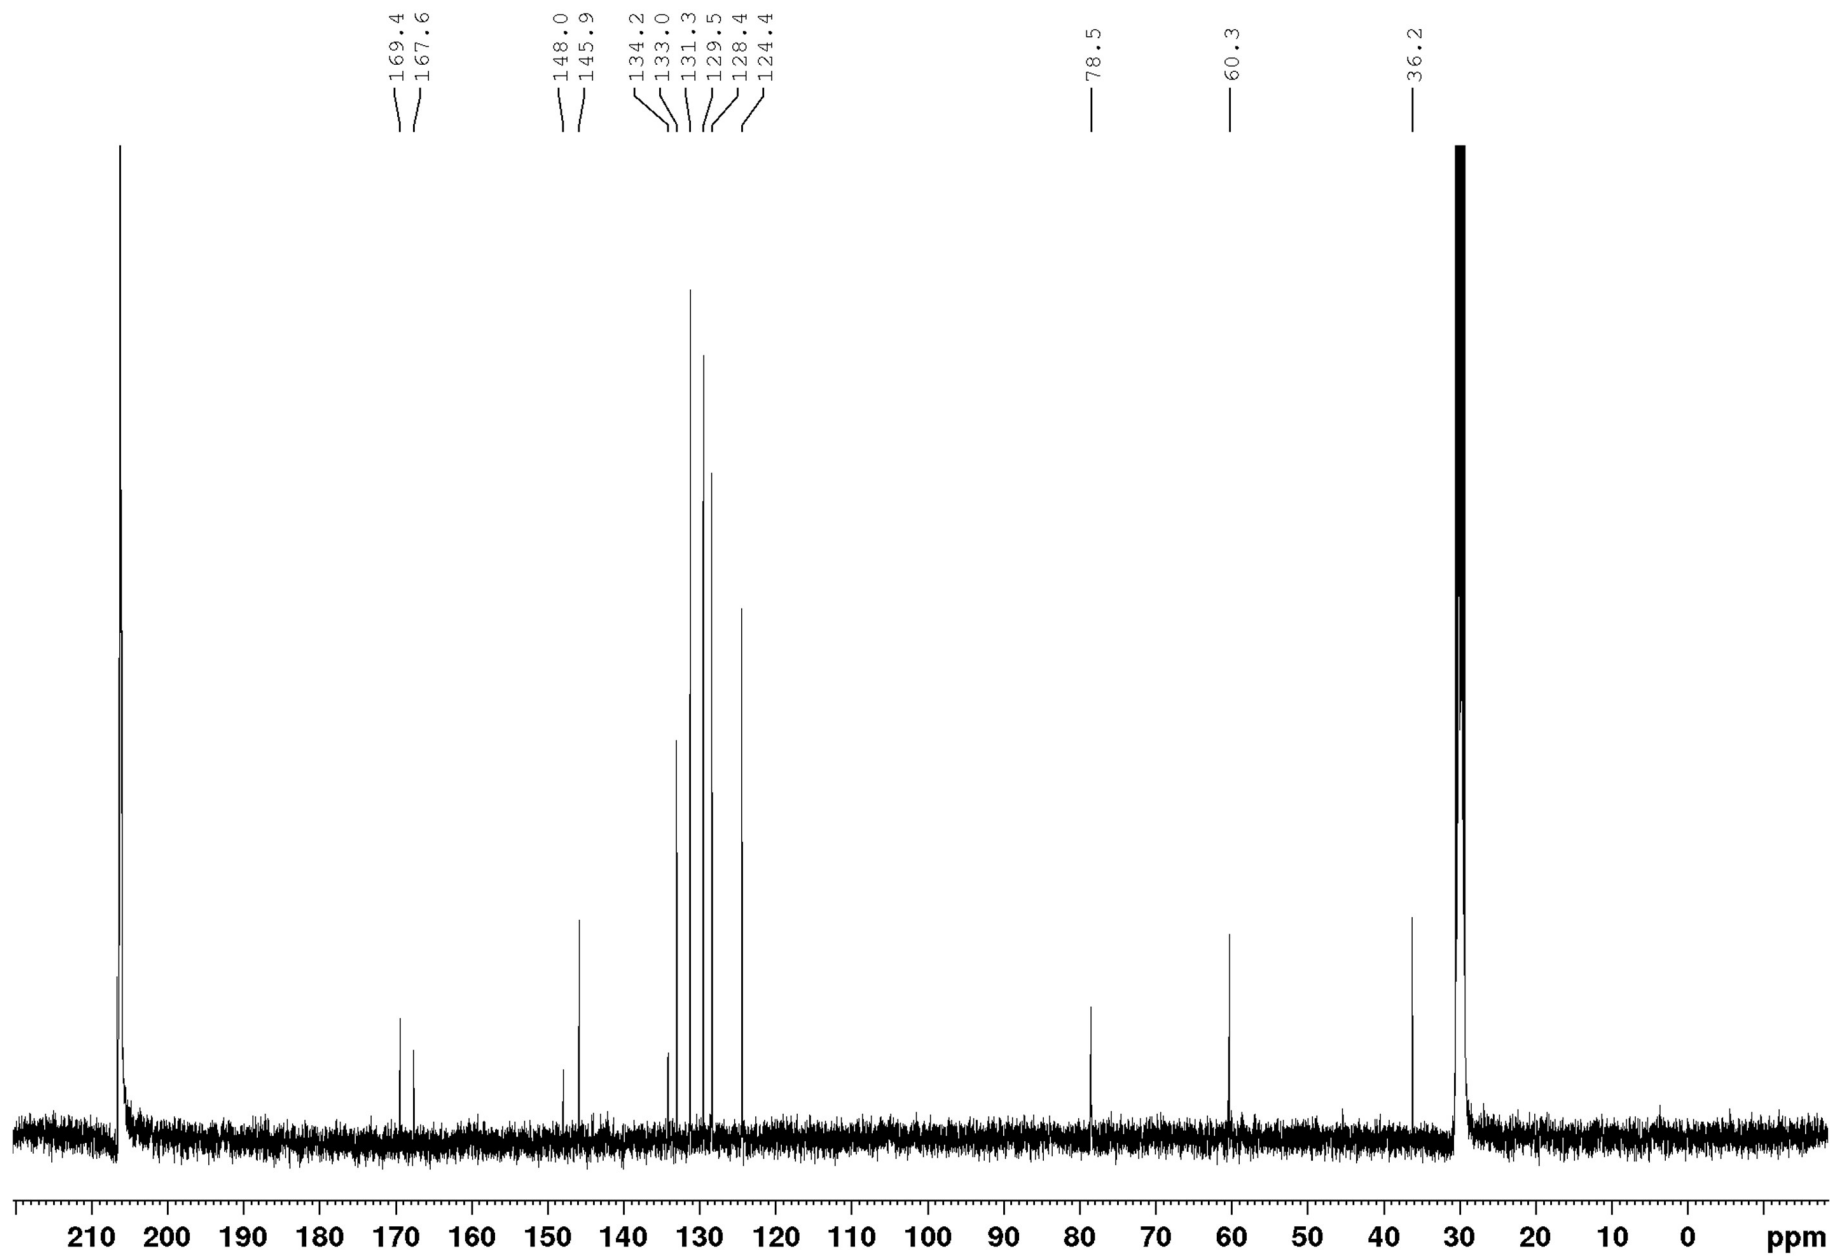

Figure S36:  $^{13}\text{C}$  NMR of **4** in acetone- $\text{d}_6$  at 298 K.

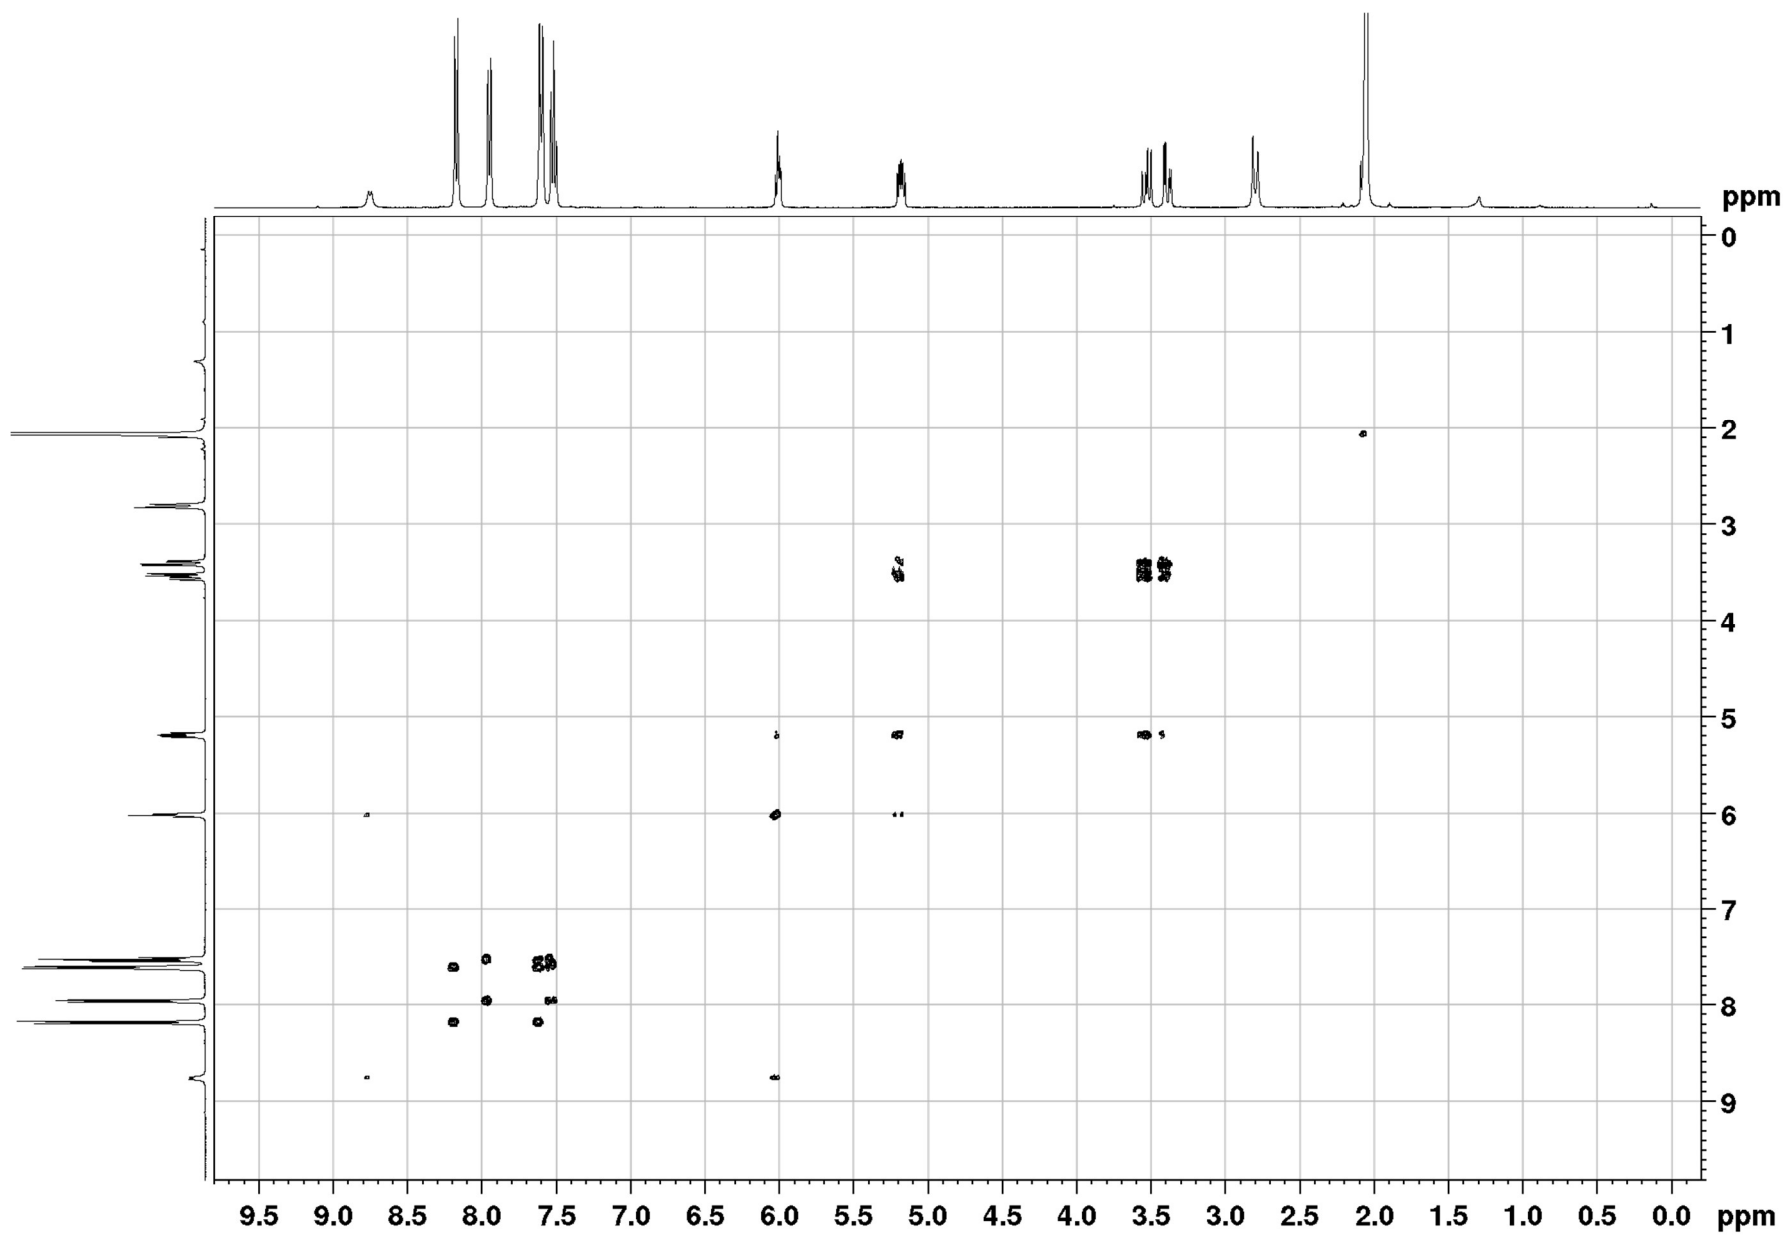

Figure S37: COSY NMR for 4 in acetone-d<sub>6</sub> at 298 K.

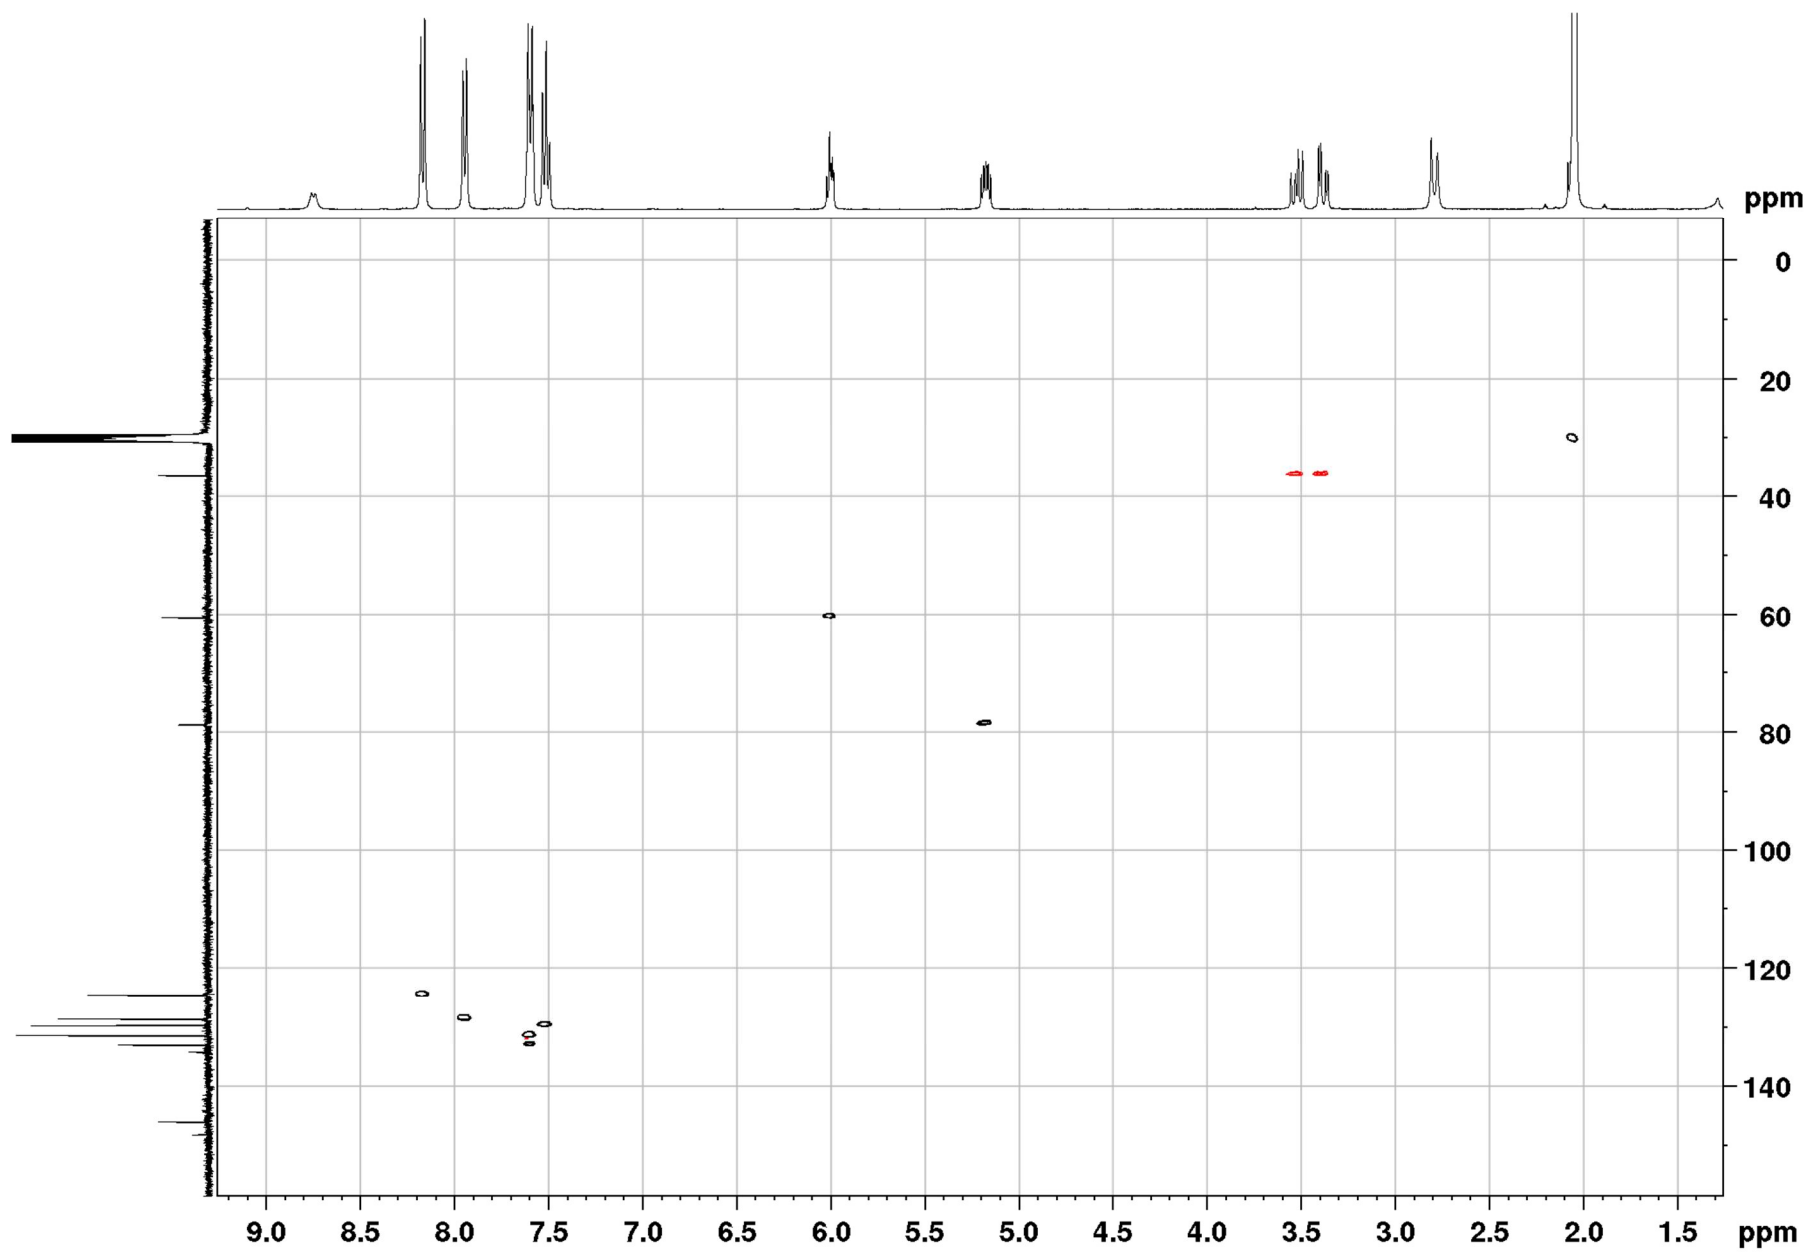

Figure S38: HSQC-edited NMR of 4 in acetone- $\text{d}_6$  at 298 K.

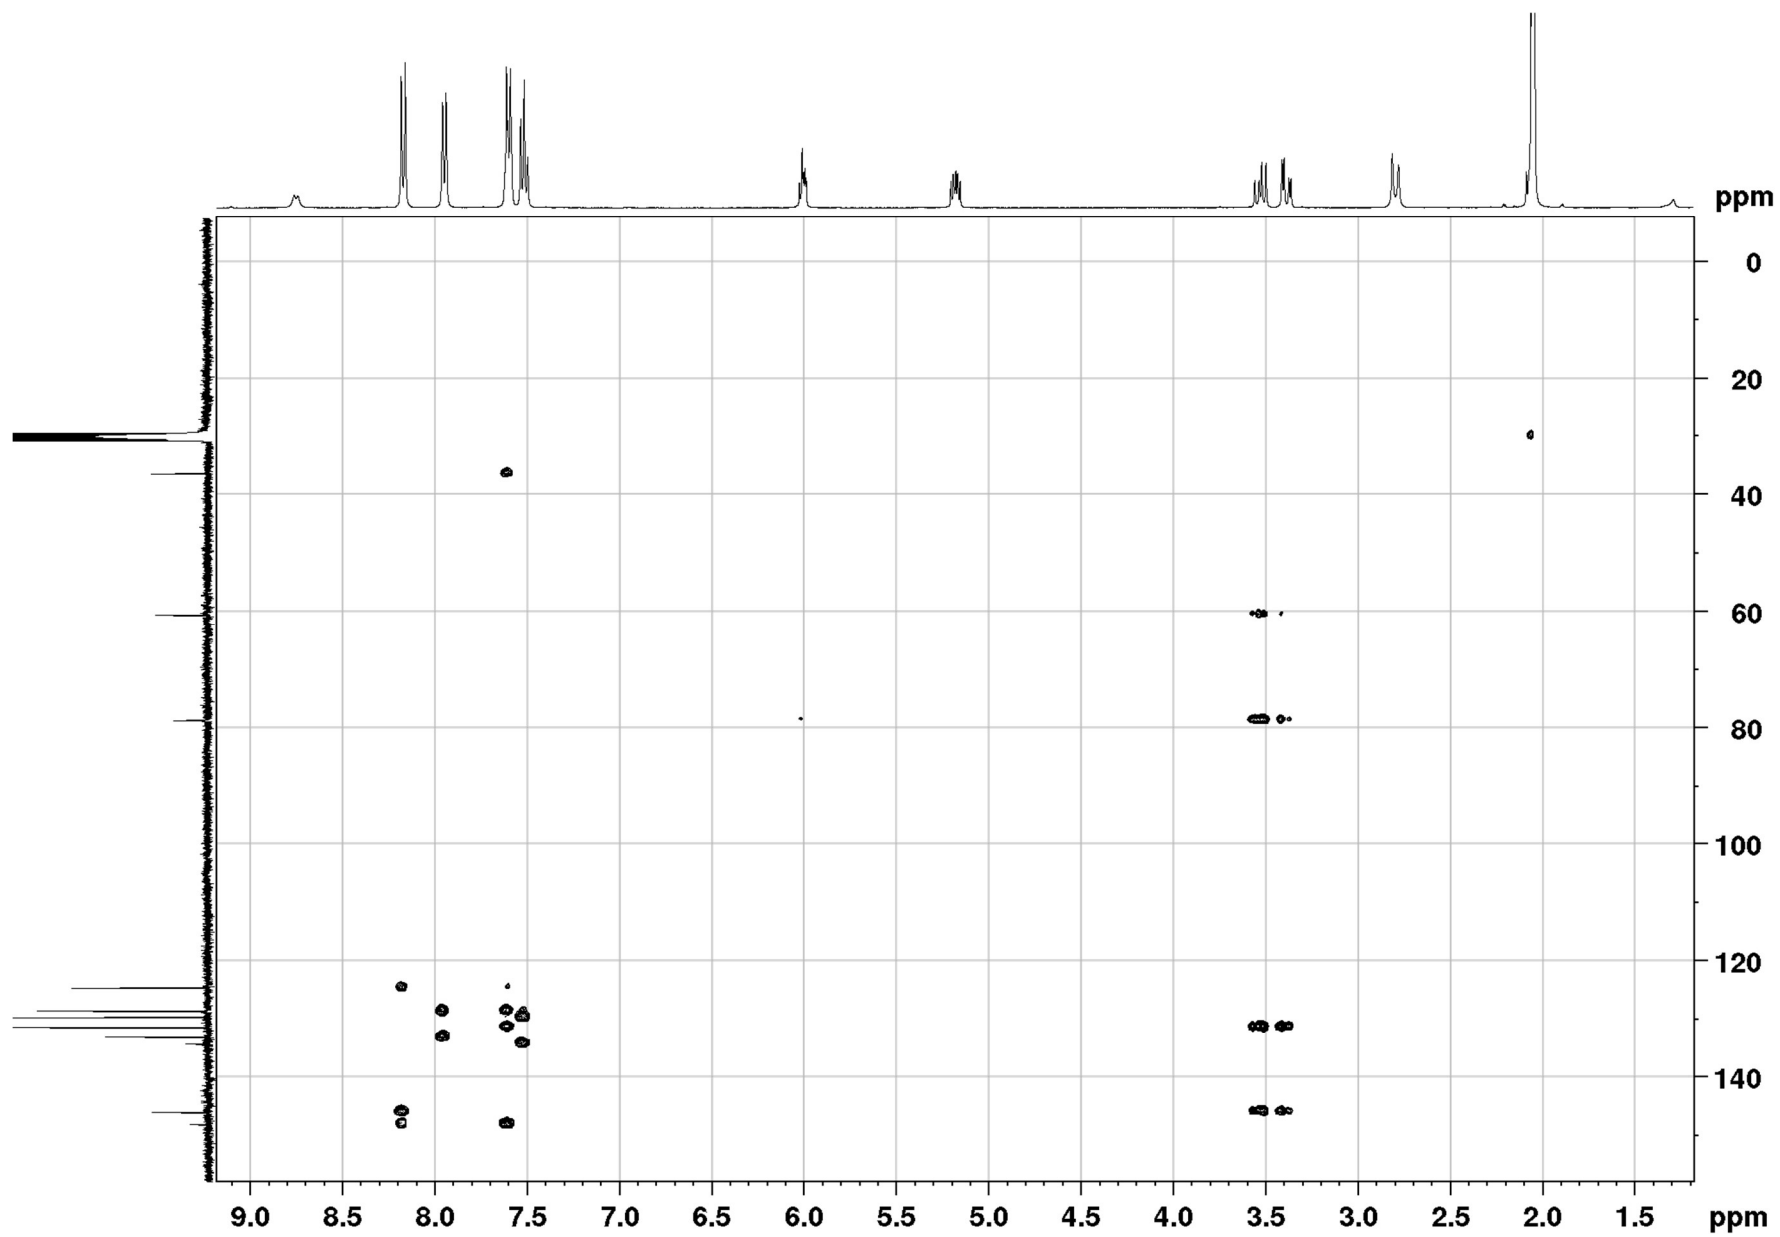

Figure S39: HMBC NMR of 4 in acetone-d<sub>6</sub> at 298 K.

## Hydrolysed obafluorin (5)

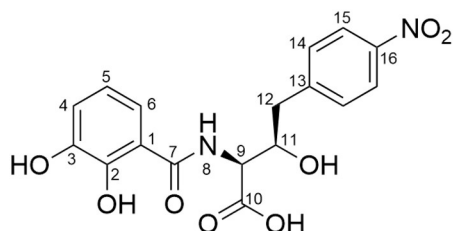

**Table S6:** Resonances assignment in  $^1\text{H}$  and  $^{13}\text{C}$  NMR spectra of **5** in acetone- $d_6$  at 298 K.

| Position | $\delta_{\text{H}}$ (no. of protons, multiplicity, $J$ in Hz) | $\delta_{\text{C}}$ | COSY             | HMBC           |
|----------|---------------------------------------------------------------|---------------------|------------------|----------------|
| 1        |                                                               | 115.5               |                  |                |
| 2        |                                                               | 150.6               |                  |                |
| 3        |                                                               | 147.4               |                  |                |
| 4        | 7.44-7.40 (1H, m)                                             | 118.4               | 5                | 2, 6, 7        |
| 5        | 6.83-6.78 (1H, m)                                             | 119.5               | 4, 6             | 1, 3, 6        |
| 6        | 7.05-7.02 (1H, m)                                             | 119.9               | 5                | 2, 3, 4        |
| 7        |                                                               | 171.4               |                  |                |
| 8        | 7.92-7.86 (1H, m)*                                            |                     | 9                | 2, 3, 6        |
| 9        | 4.86 (1H, dd, 8.9 & 2.4)                                      | 57.2                | 8                | 10             |
| 10       | CO <sub>2</sub> H: 11.27 (1H, bs)                             | 171.7               |                  |                |
| 11       | 4.68-4.61 (1H, m)                                             | 73.0                | 11-OH (weak), 12 |                |
| 12       | 3.16 (1H, dd, 13.6 & 5.1)<br>3.06 (1H, dd, 13.6 & 8.5)        | 41.3                | 11, 12           | 9, 11, 13, 14  |
| 13       |                                                               | 147.8               |                  |                |
| 14       | 7.63 (2H, d, 8.6)                                             | 131.7               | 15               | 12, 14, 15, 16 |
| 15       | 8.18 (2H, d, 8.6)                                             | 124.2               | 14               | 15, 16         |
| 16       |                                                               | 147.8               |                  |                |
| 2-OH     | 12.25 (1H, s)                                                 |                     |                  |                |
| 3-OH     | 7.92-7.86 (1H, m)*                                            |                     |                  |                |
| 11-OH    | 4.79-4.74 (1H, m)                                             |                     | 11 (weak)        | 11             |

\*H-8 and 3-OH are under the same signal.

Note that there was some formic acid from purification in the sample used for  $^{13}\text{C}$  and HMBC ( $\delta_{\text{H}}$  8.10 and  $\delta_{\text{C}}$  162.4).<sup>7</sup>

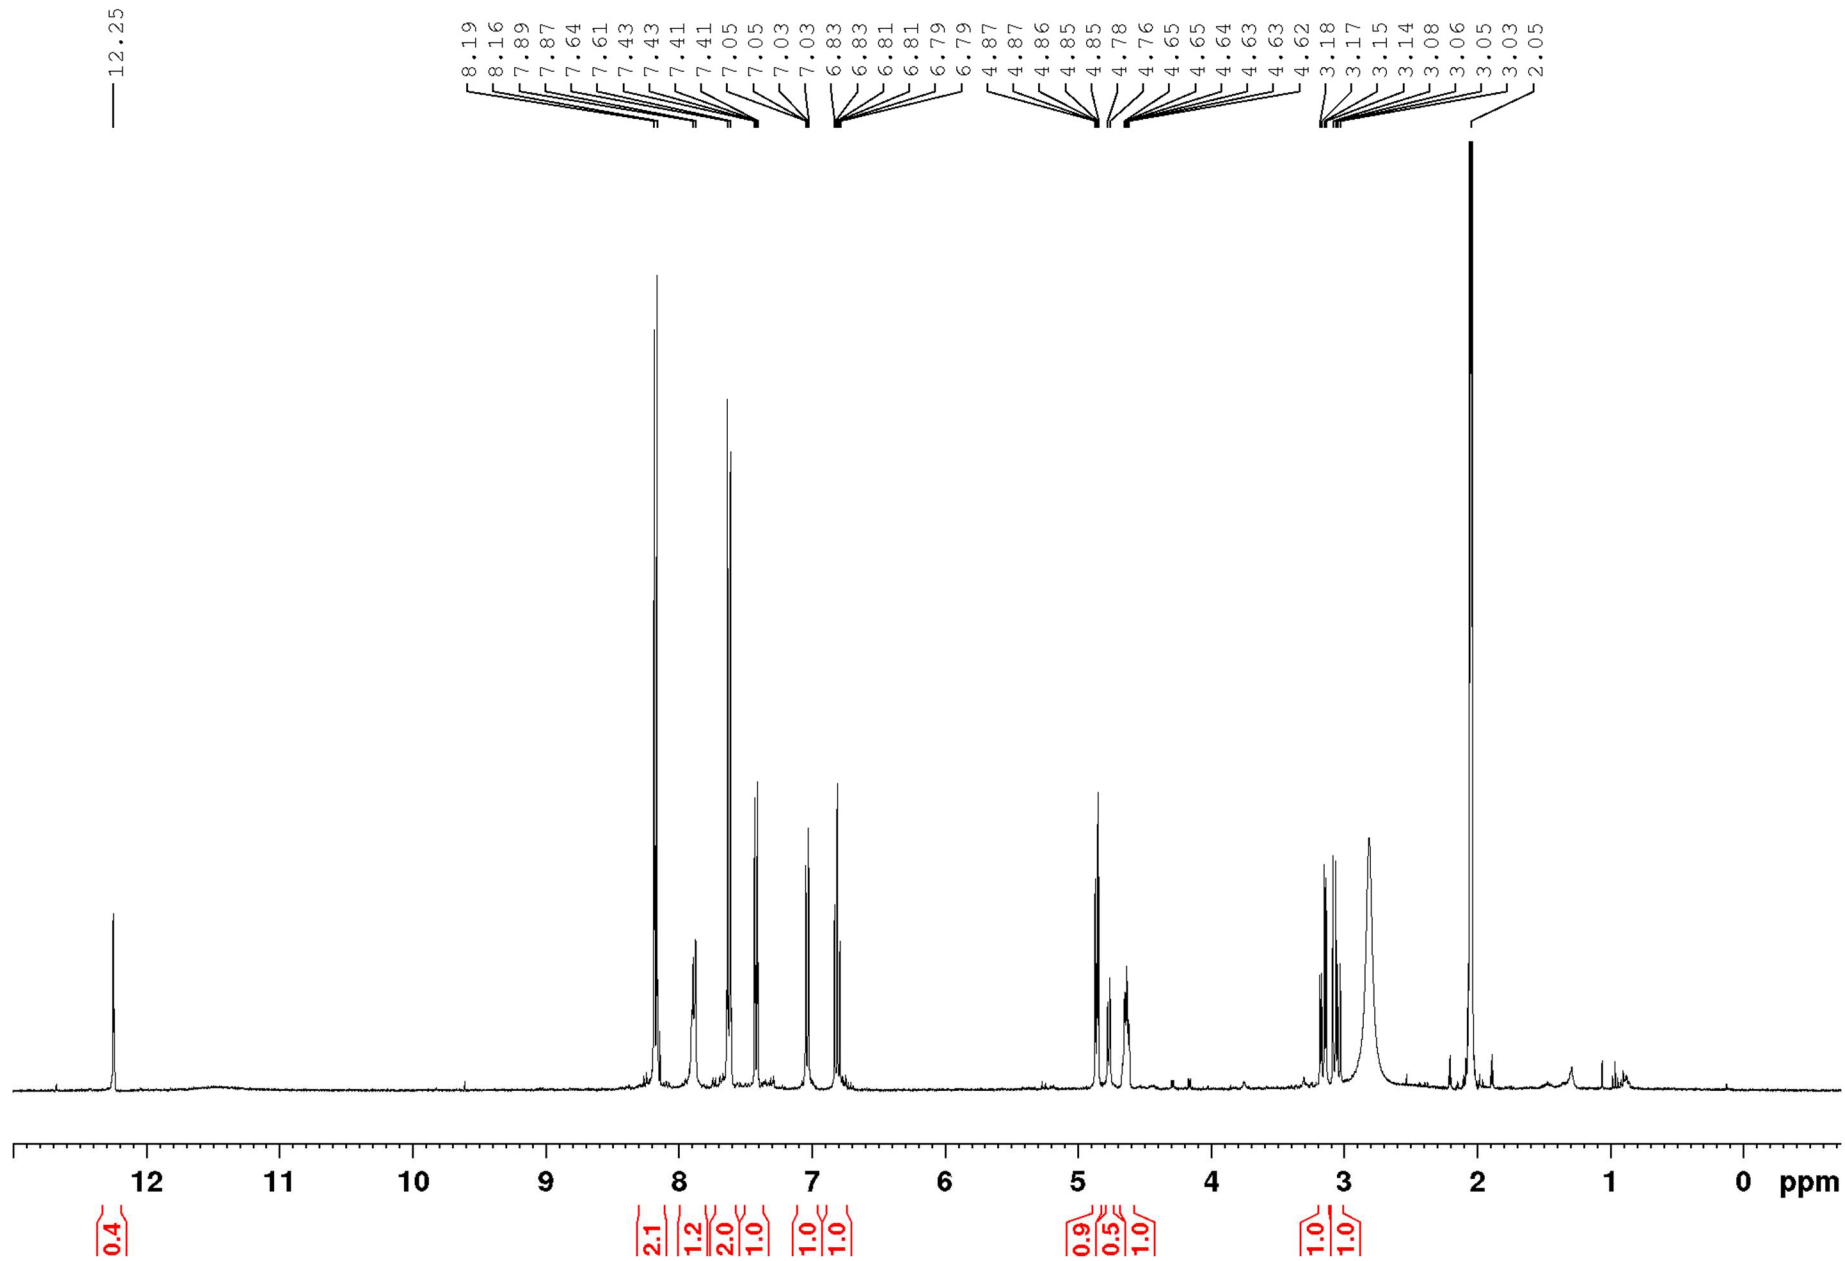

Figure S40:  $^1\text{H}$  NMR of **5** in acetone- $\text{d}_6$  at 298 K.

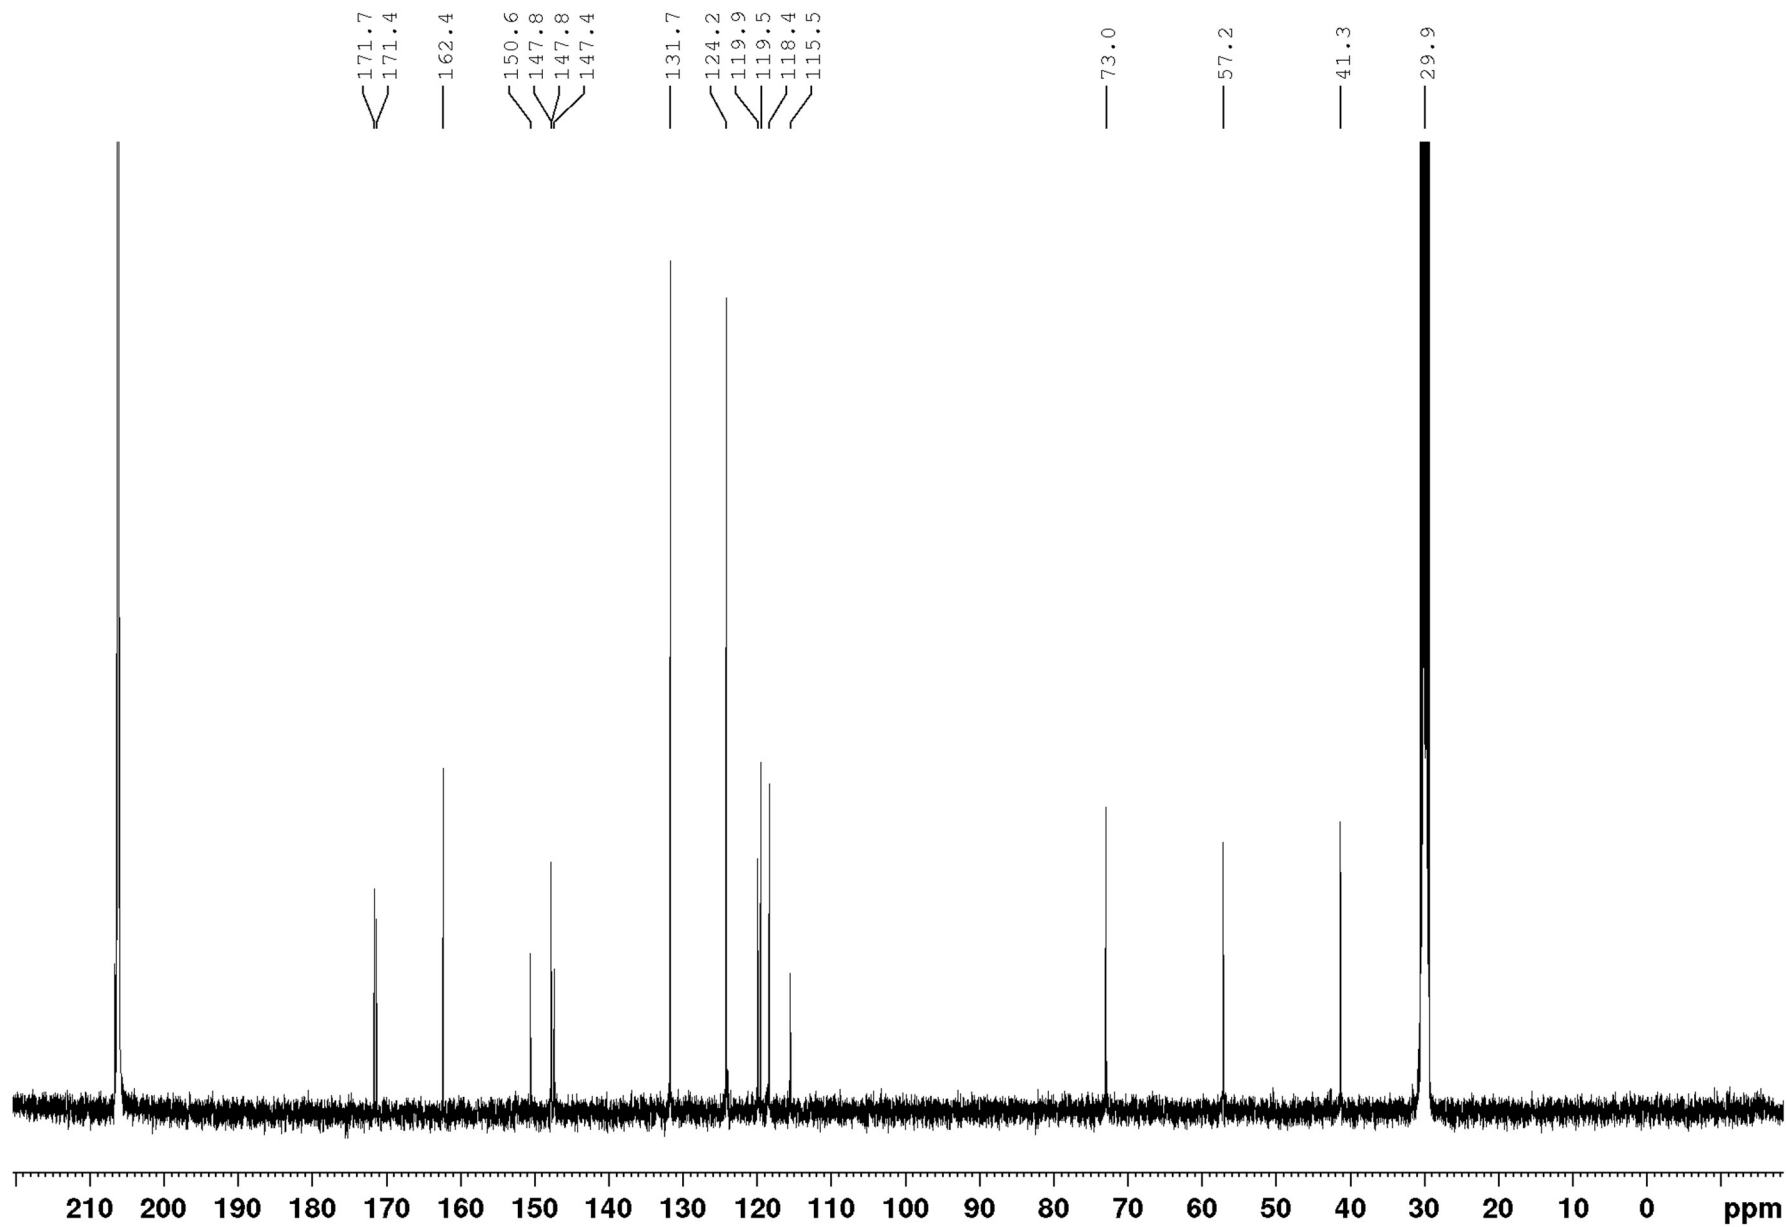

Figure S41:  $^{13}\text{C}$  NMR of **5** in acetone- $\text{d}_6$  at 298 K.



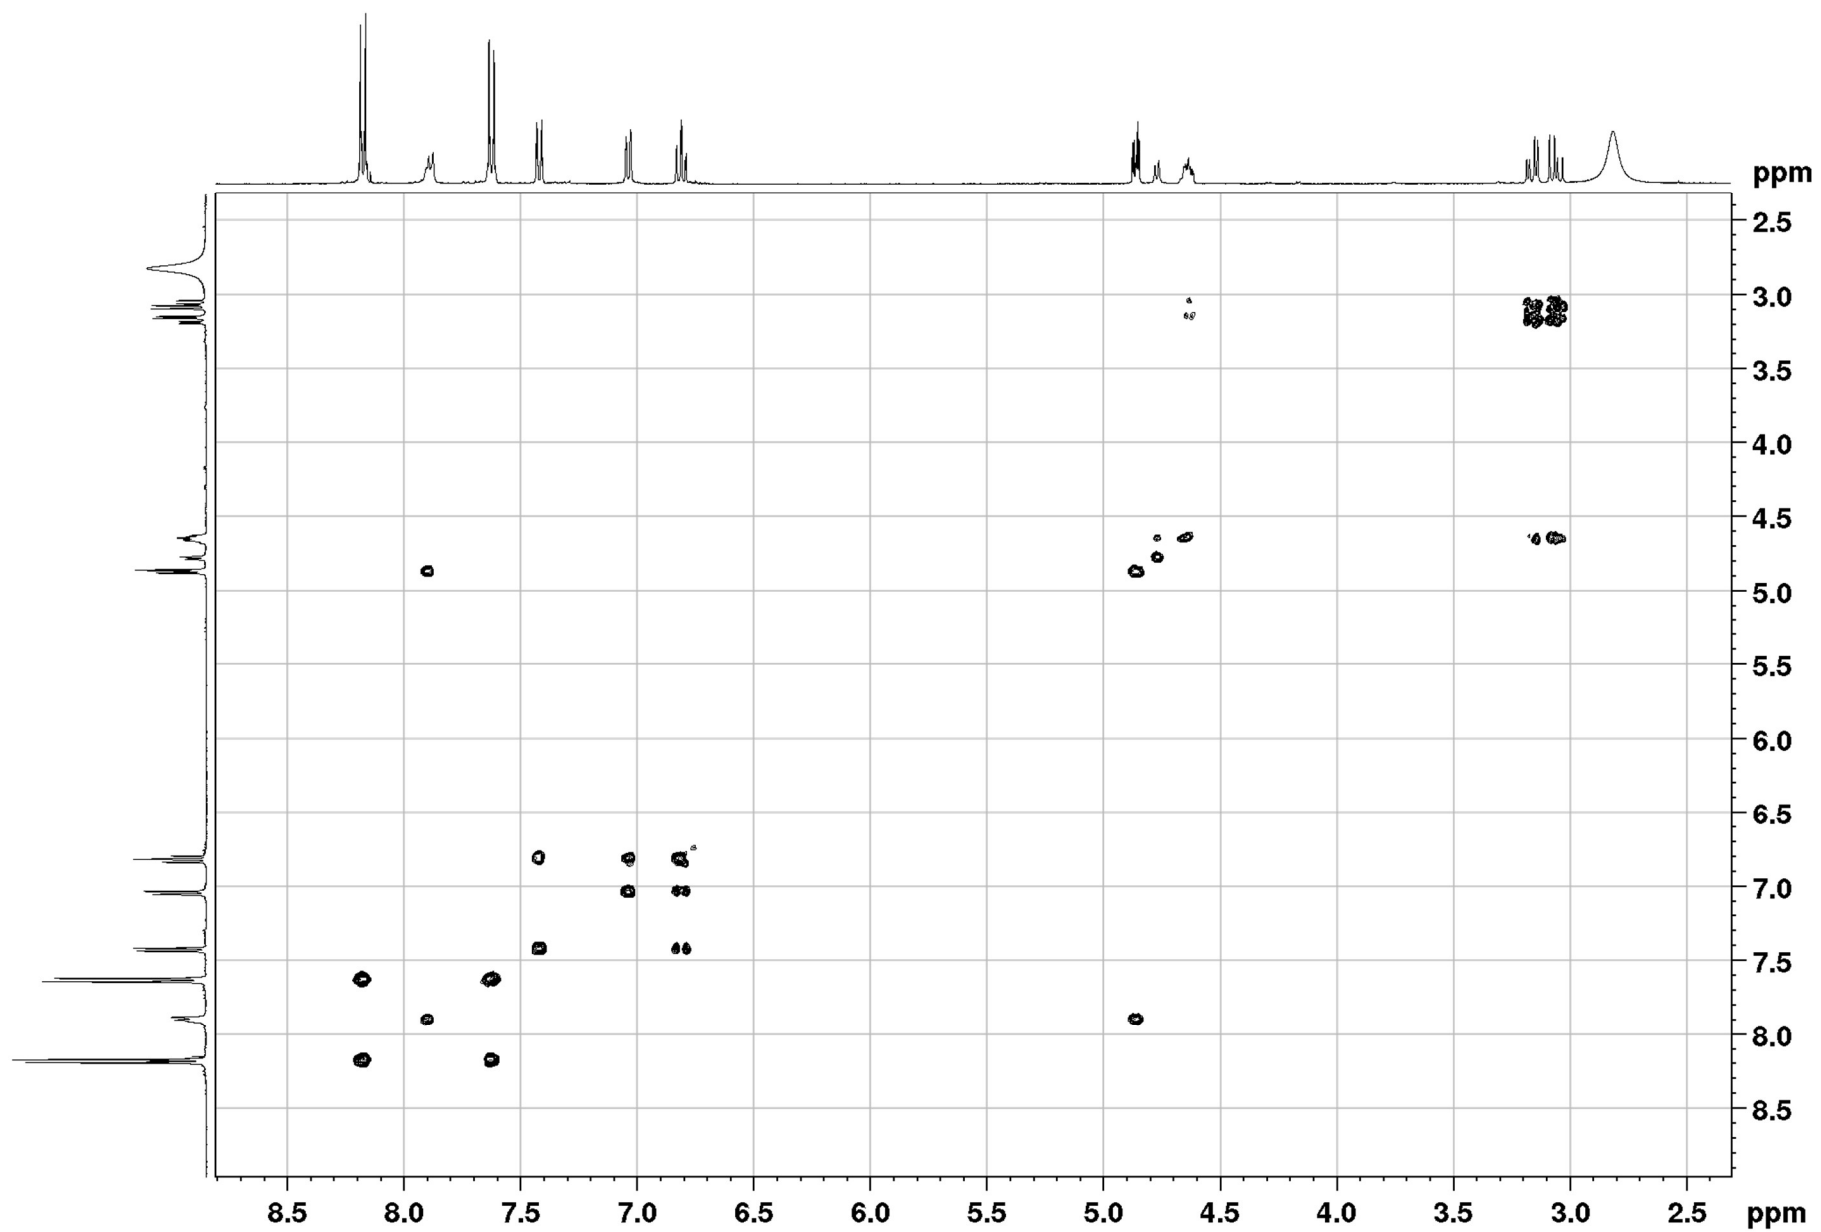

**Figure S42:** COSY NMR of **5** in acetone-d<sub>6</sub> at 298 K.

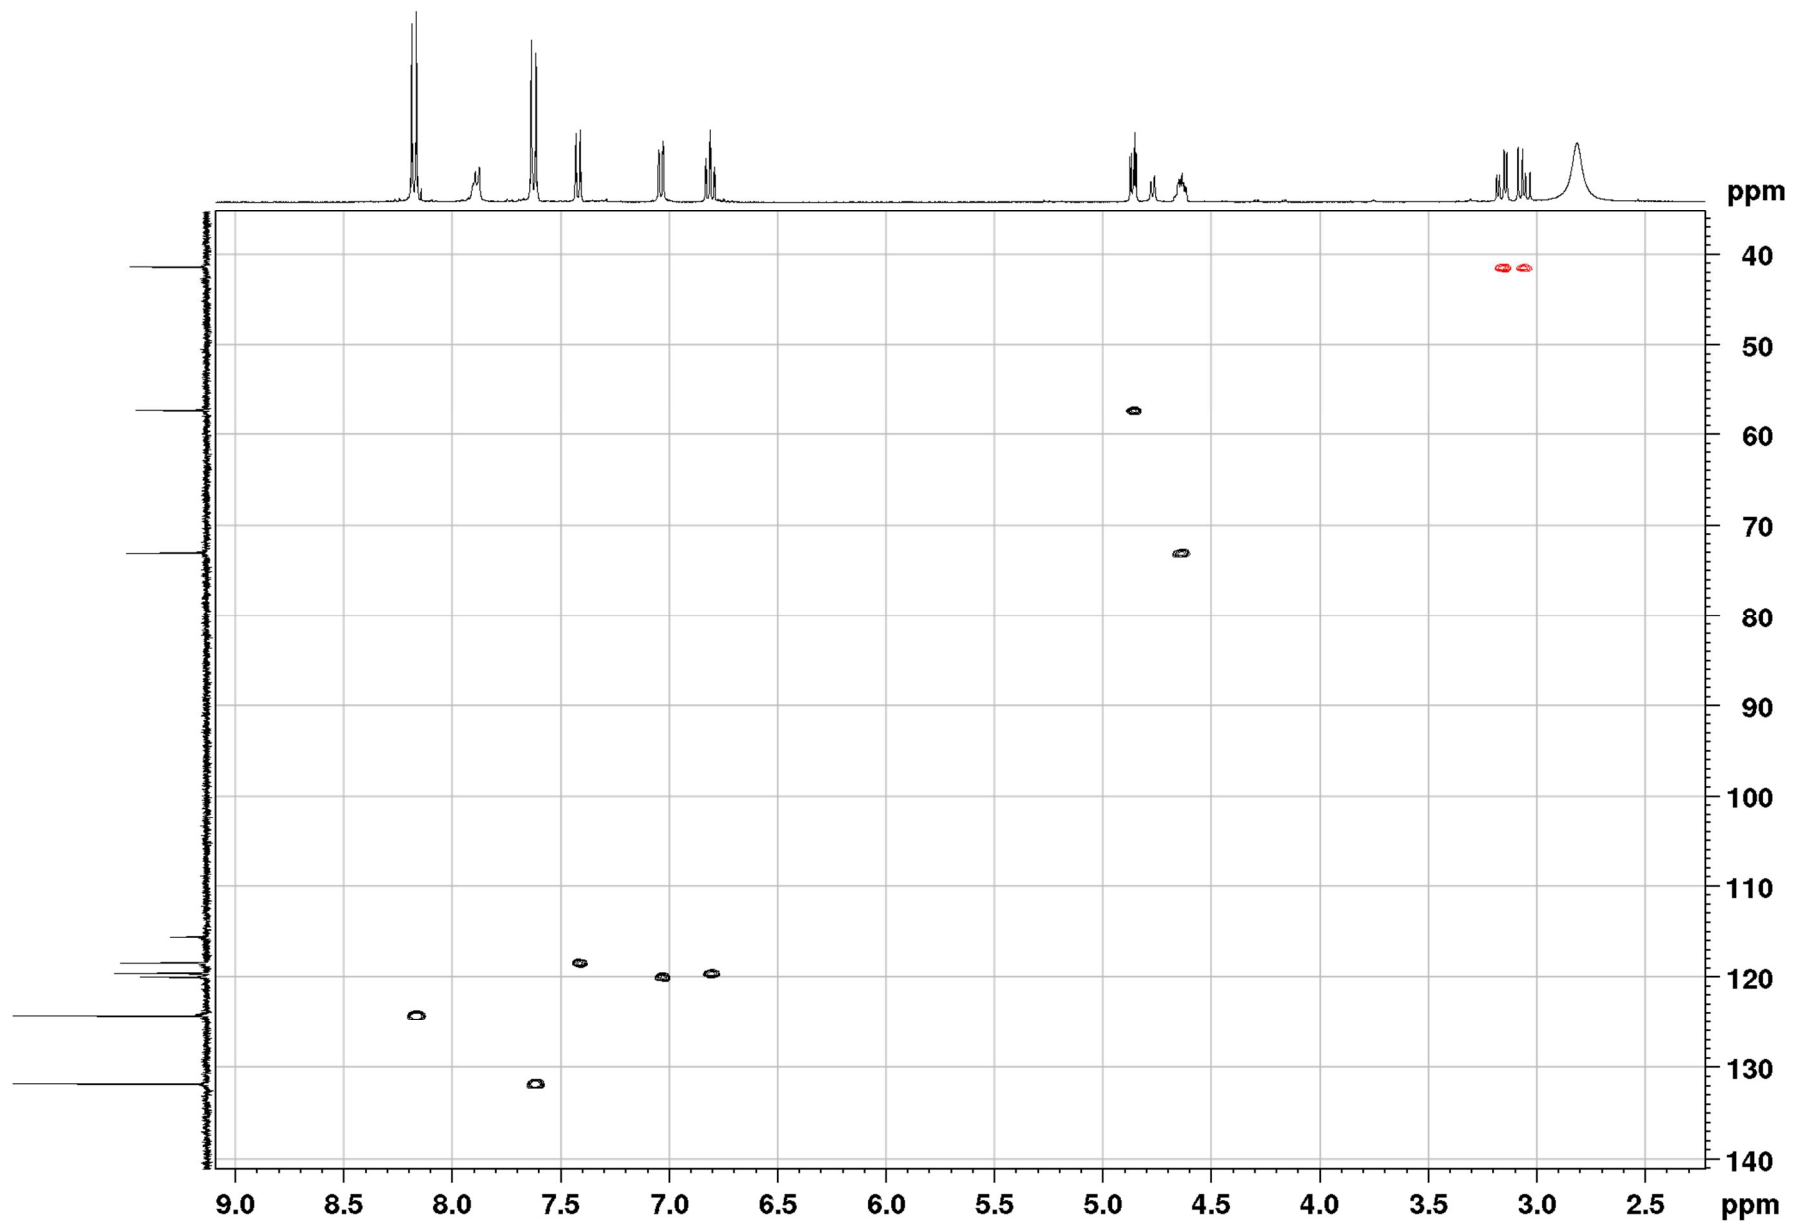

Figure S43: HSQC-edited NMR for **5** in acetone-d<sub>6</sub> at 298 K.

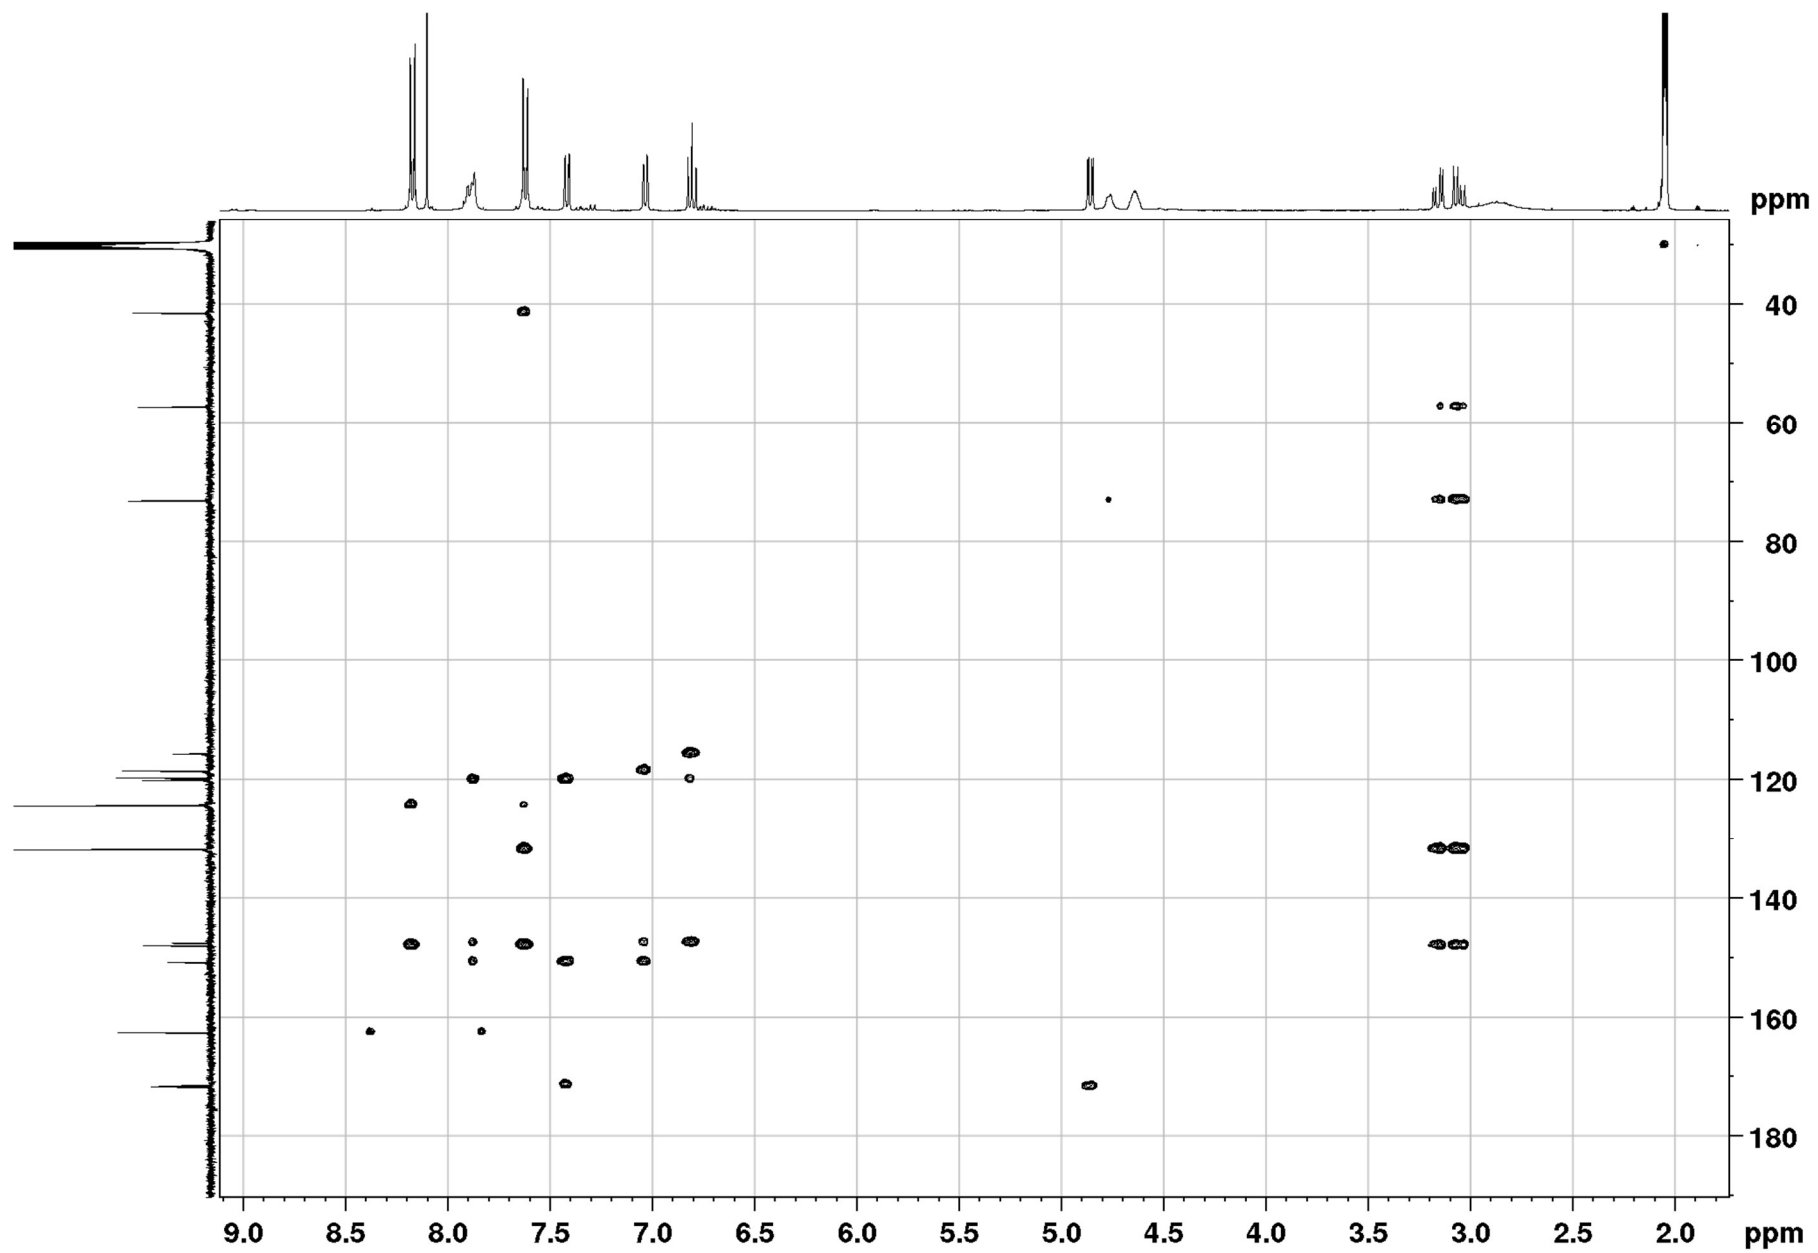

Figure S44: HMBC NMR for 5 in acetone-d<sub>6</sub> at 298 K.

## Methanolysed obafluorin (6)

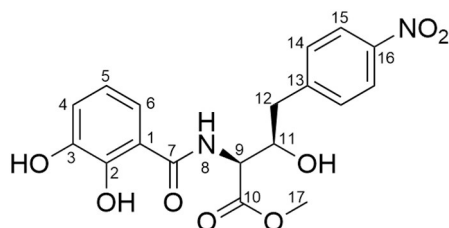

**Table S7:** Resonances assignment in  $^1\text{H}$  and  $^{13}\text{C}$  NMR spectra of **6** in acetone- $d_6$  at 298 K.

| Position | $\delta_{\text{H}}$ (no. of protons, multiplicity, $J$ in Hz) | $\delta_{\text{C}}$ | COSY      | HMBC           |
|----------|---------------------------------------------------------------|---------------------|-----------|----------------|
| 1        |                                                               | 115.6               |           |                |
| 2        |                                                               | 150.5               |           |                |
| 3        |                                                               | 147.4               |           |                |
| 4        | 7.43 (1H, dd, 8.2 & 1.4)                                      | 118.5               | 5         | 2, 6, 7        |
| 5        | 6.81 (1H, dd, 8.2 & 7.9)                                      | 119.5               | 4, 6      | 1, 3, 6        |
| 6        | 7.04 (1H, dd, 7.9 & 1.0)                                      | 120.0               | 5         | 2, 3, 4        |
| 7        |                                                               | 171.3               |           |                |
| 8        | 7.98 (1H, d, 8.6)                                             |                     | 9         |                |
| 9        | 4.86 (1H, dd, 8.6 & 2.6)                                      | 57.5                | 8         | 10, 11 (weak)  |
| 10       |                                                               | 171.3               |           |                |
| 11       | 4.62-4.56 (1H, m)                                             | 72.9                | 11-OH, 12 |                |
| 12       | 3.14 (1H, dd, 13.8 & 5.1)<br>3.04 (1H, dd, 13.8 & 8.4)        | 41.4                | 11, 12    | 9, 11, 13, 14  |
| 13       |                                                               | 147.7               |           |                |
| 14       | 7.61 (2H, d, 8.6)                                             | 131.7               | 15        | 12, 13, 14, 15 |
| 15       | 8.17 (2H, d, 8.8)                                             | 124.2               | 14        | 15, 16         |
| 16       |                                                               | 147.7               |           |                |
| 17       | 3.72 (3H, s)                                                  | 52.8                |           | 10             |
| 2-OH     | 12.14 (1H, s)                                                 |                     |           |                |
| 3-OH     | 7.92 (1H, s)                                                  |                     |           | 2, 3, 5        |
| 11-OH    | 4.82-4.74 (1H, m)                                             |                     | 11        | 9, 11, 12,     |

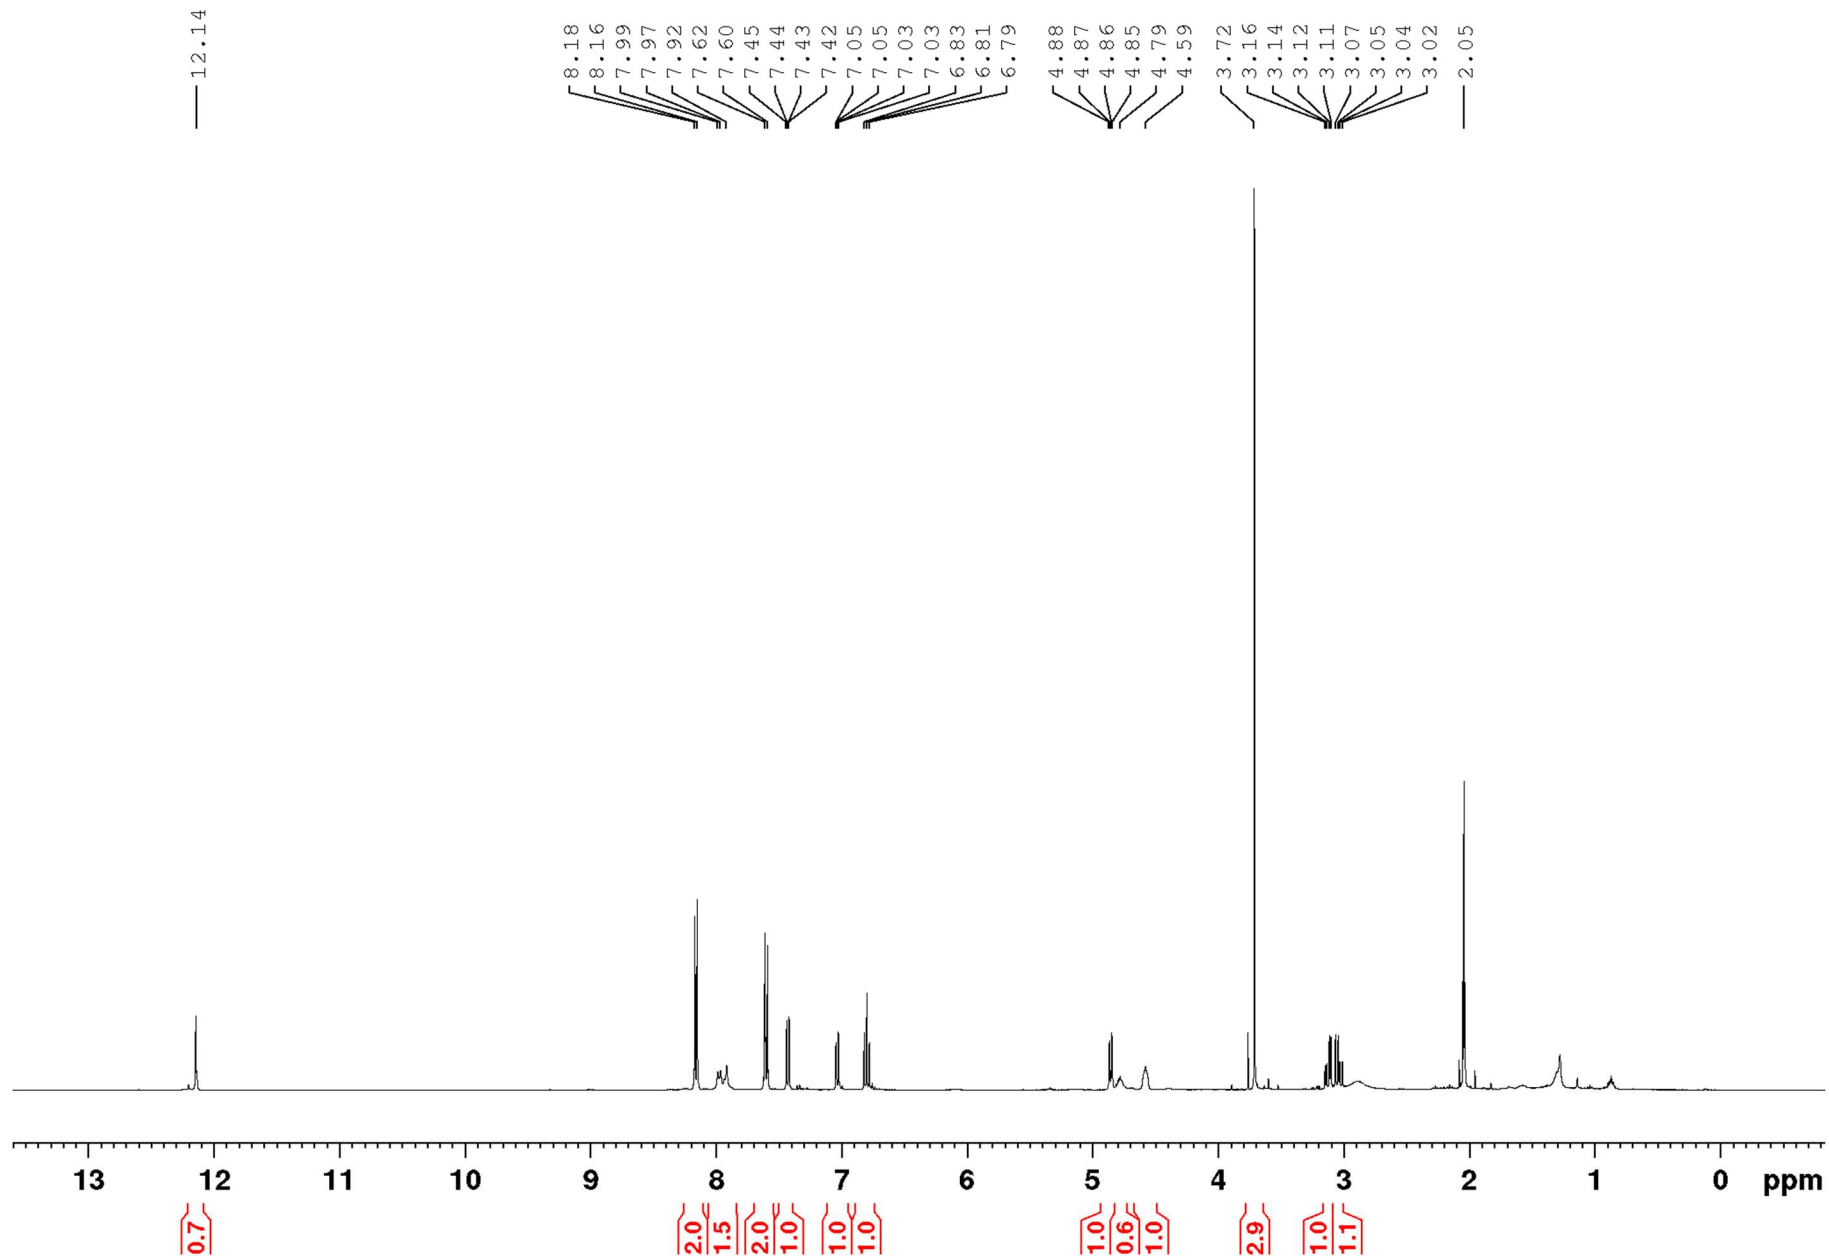

Figure S45:  $^1\text{H}$  NMR for **6** in acetone- $\text{d}_6$  at 298 K.

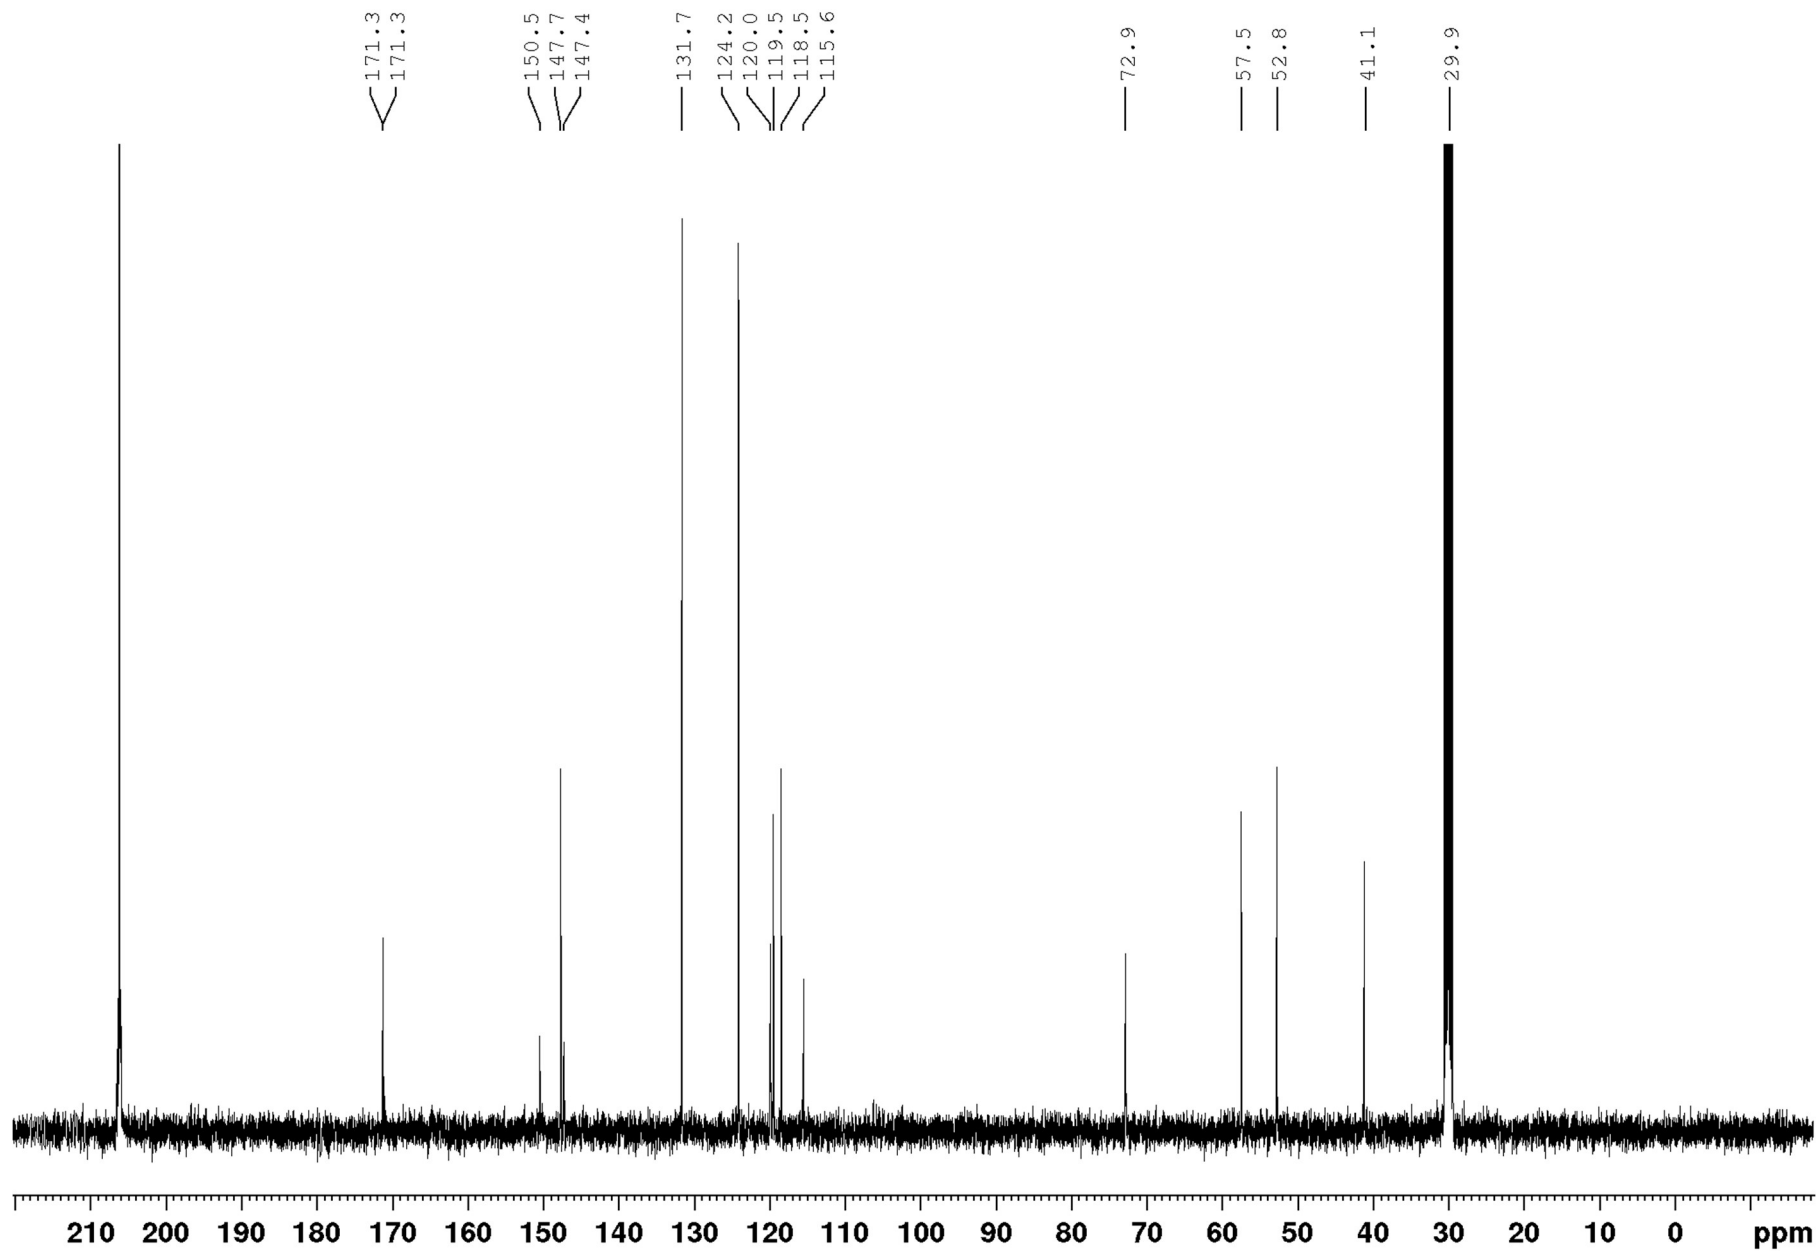

Figure S46:  $^{13}\text{C}$  NMR for **6** in acetone- $\text{d}_6$  at 298 K.

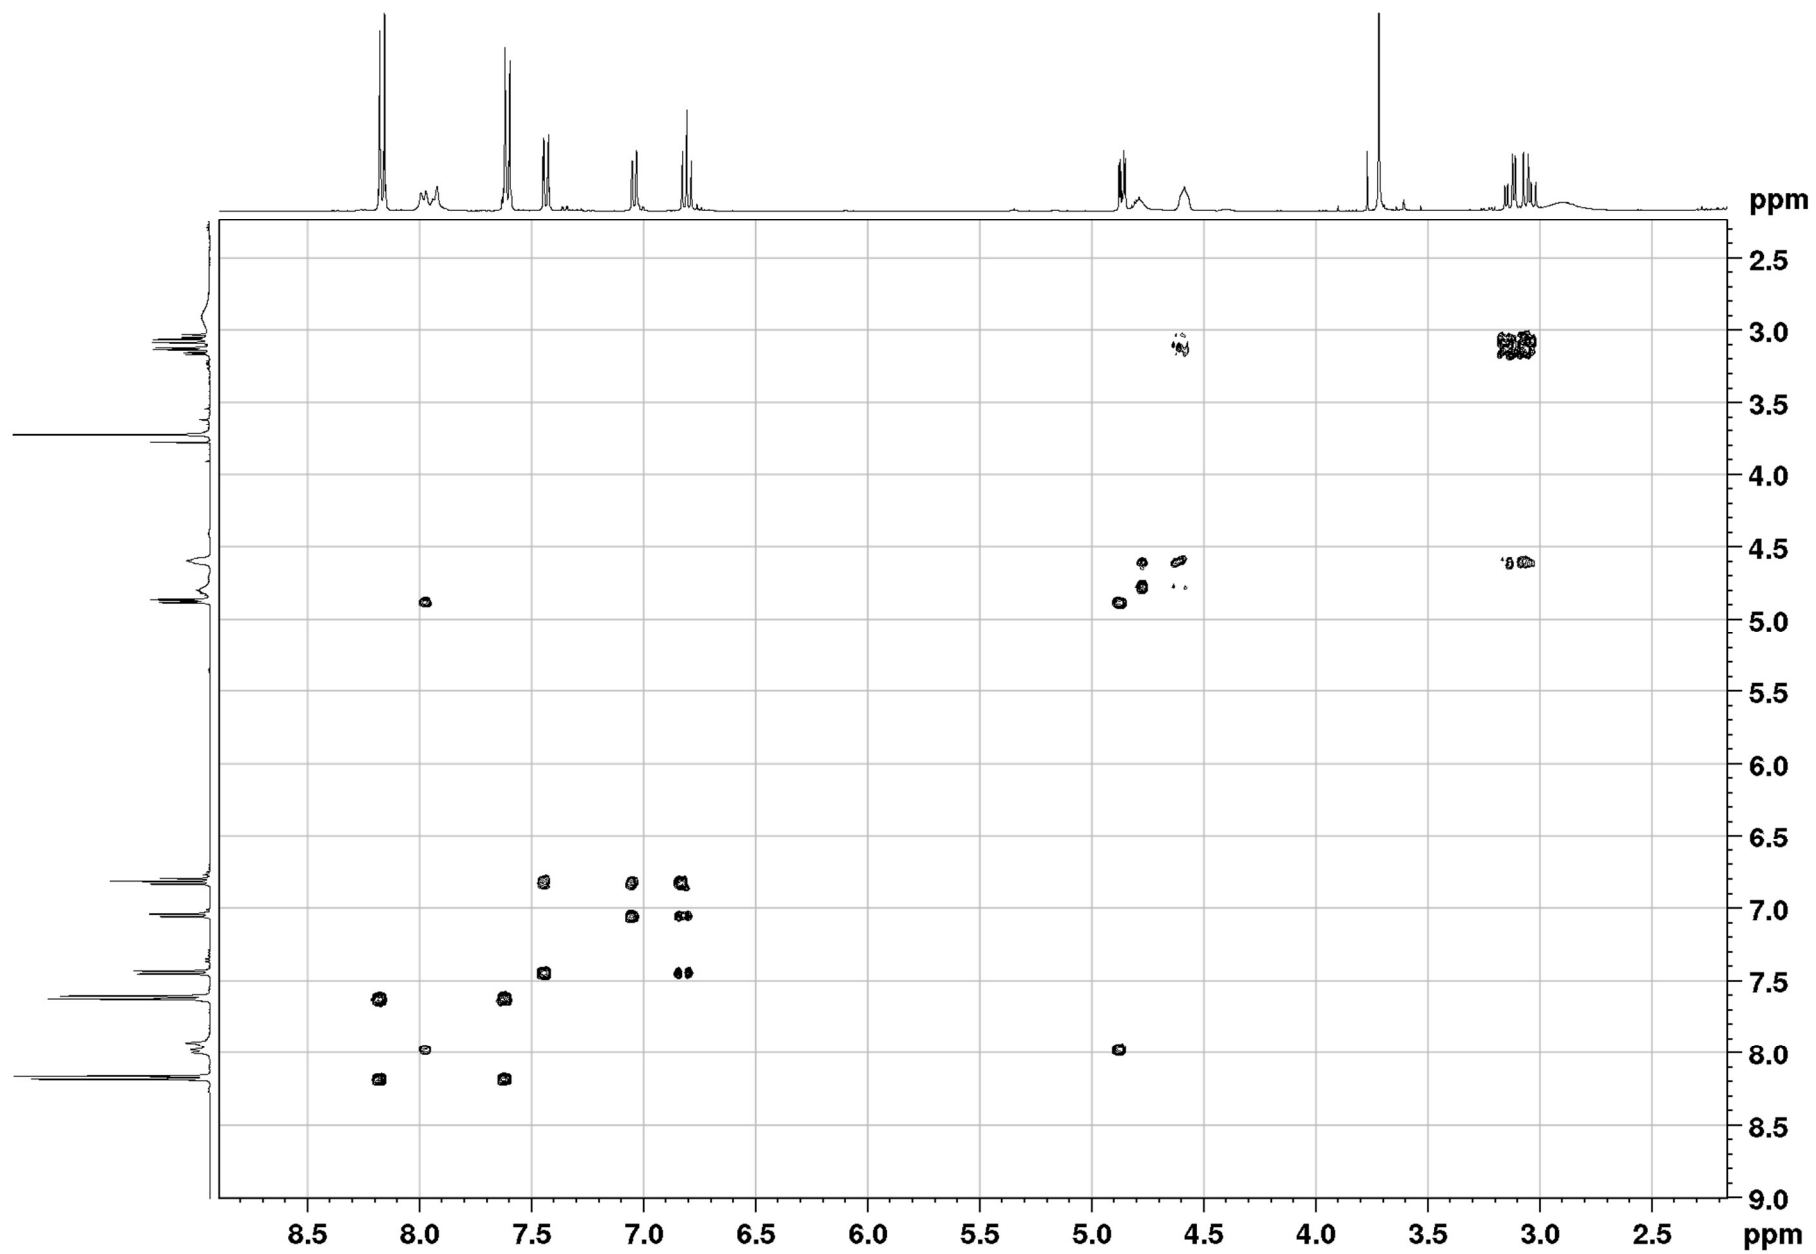

**Figure S47:** COSY NMR for **6** in acetone-d<sub>6</sub> at 298 K.



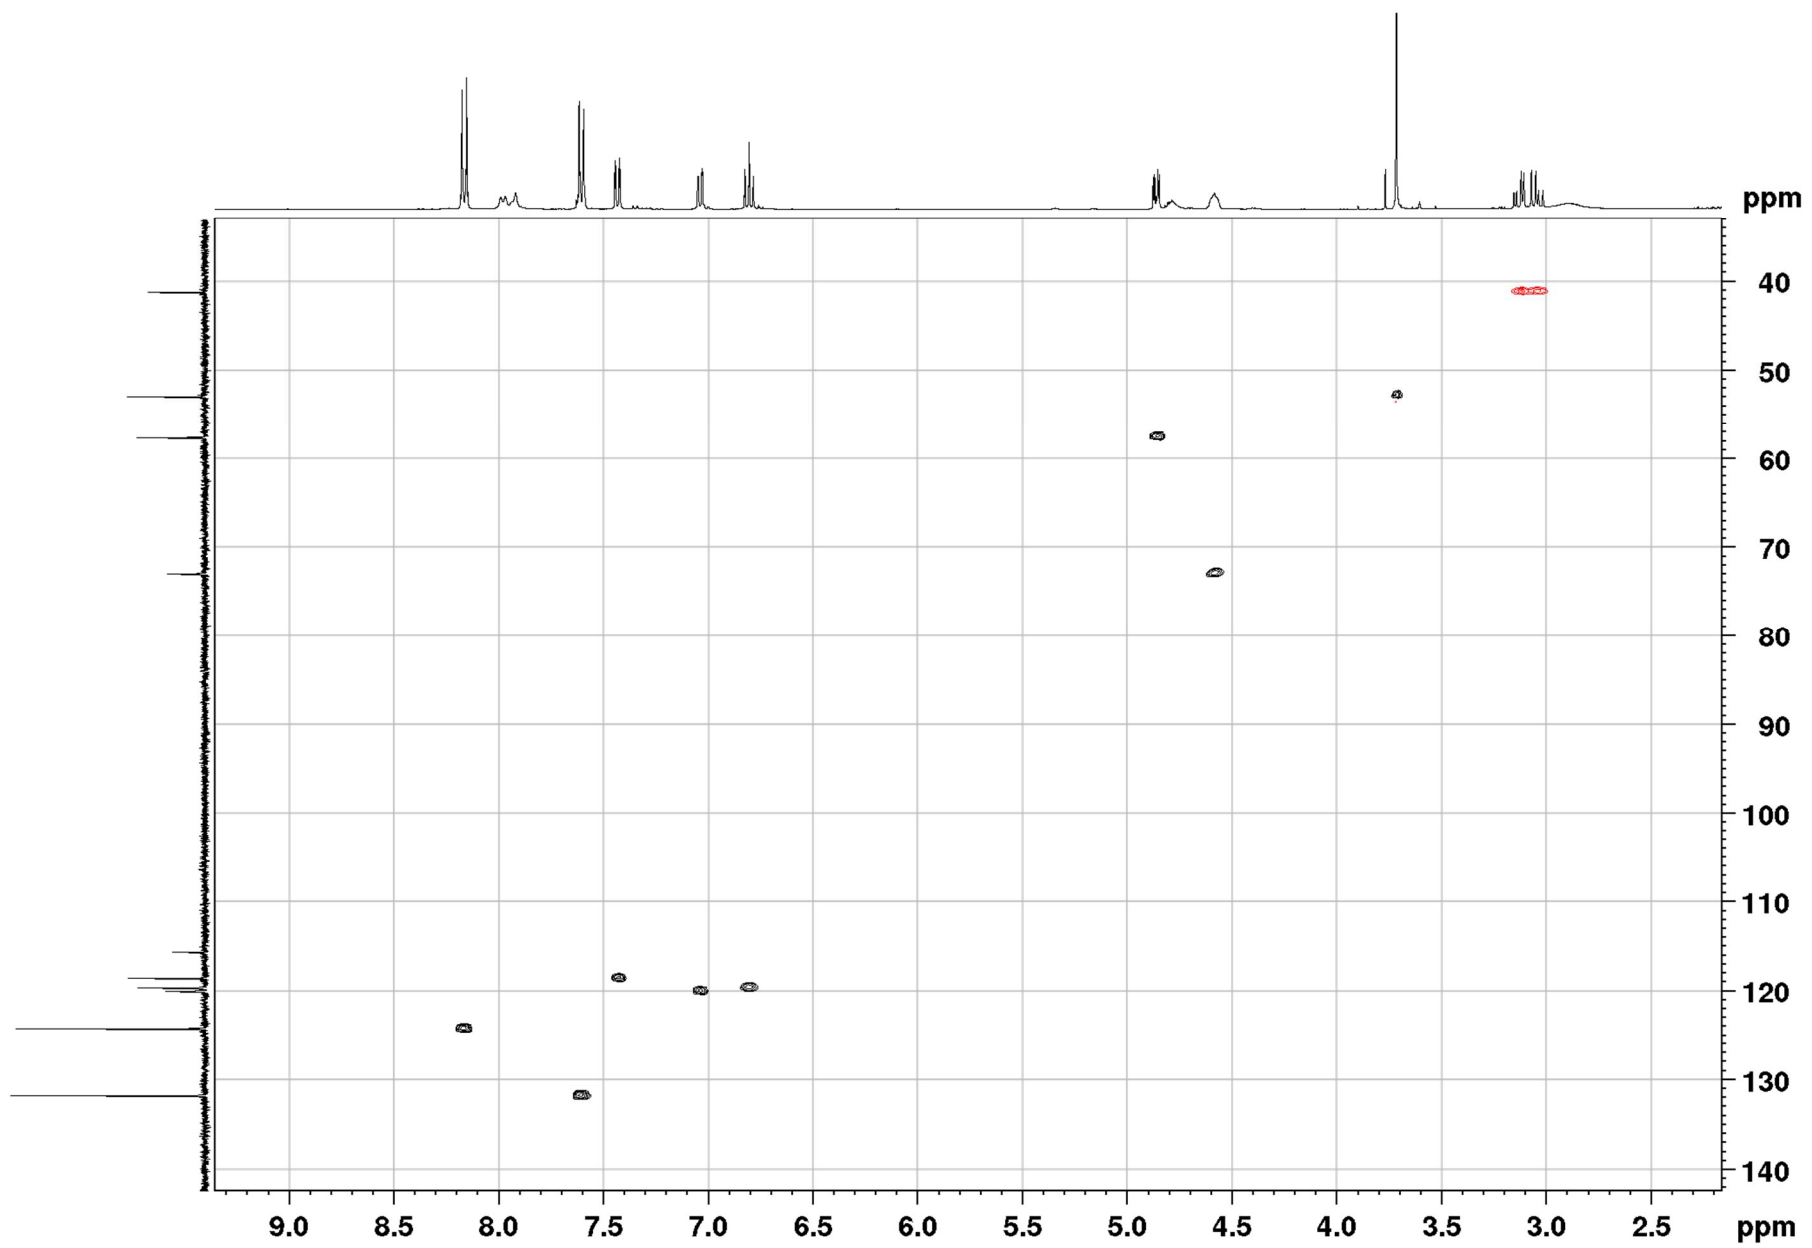

Figure S48: HSQC-edited NMR for **6** in acetone-d<sub>6</sub> at 298 K.

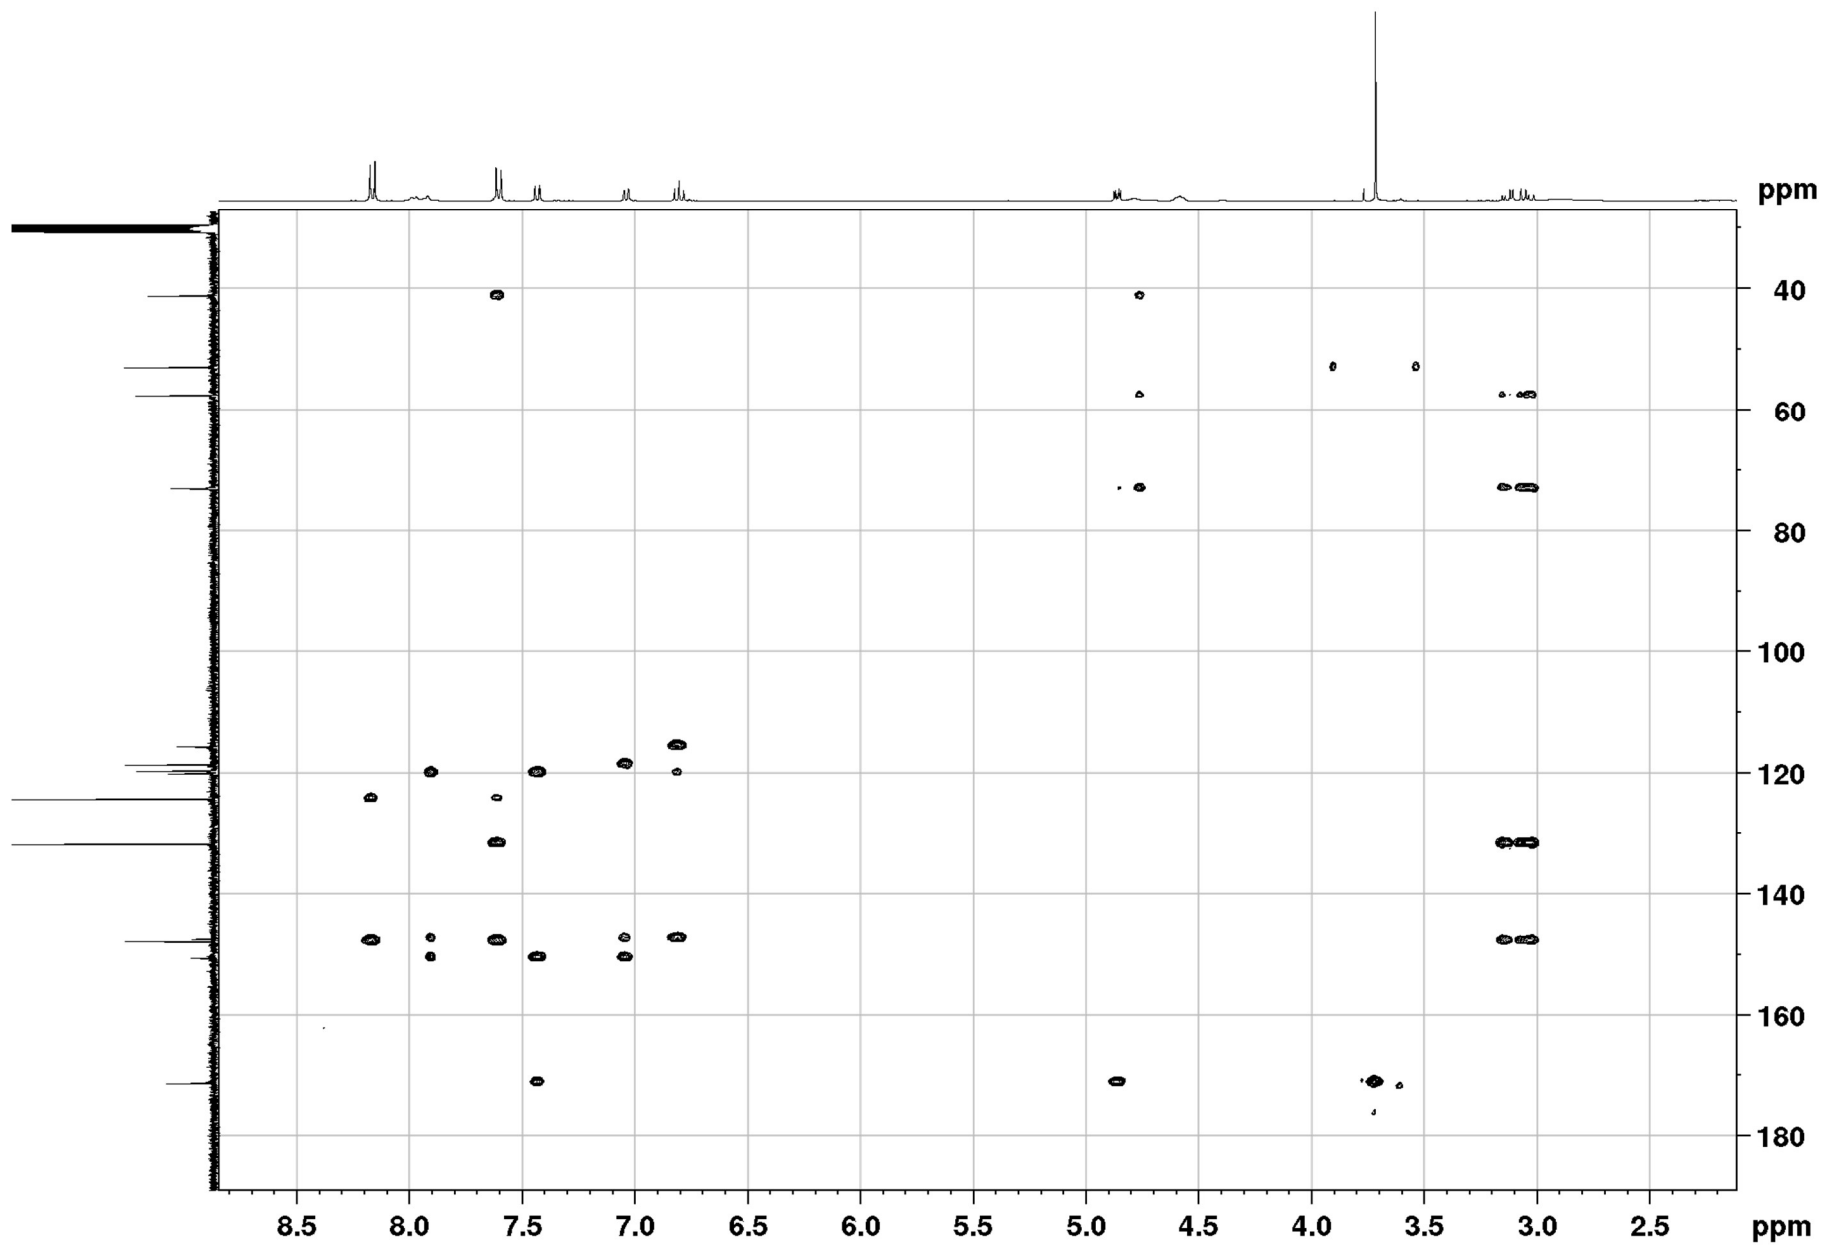

Figure S49: HMBC NMR for **6** in acetone- $\text{d}_6$  at 298 K.

## Hydrolysed BA-obafluorin (7)

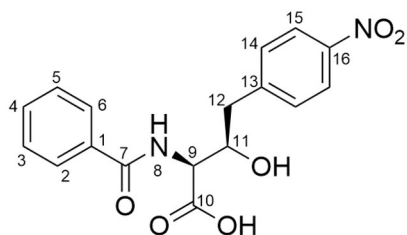

**Table S8:** Resonances assignment in  $^1\text{H}$  and  $^{13}\text{C}$  NMR spectra of **7** in acetone- $d_6$  at 298 K.

| Position | $\delta_{\text{H}}$ (no. of protons, multiplicity, $J$ in Hz) | $\delta_{\text{C}}$ | COSY   | HMBC             |
|----------|---------------------------------------------------------------|---------------------|--------|------------------|
| 1        |                                                               | 132.4               |        |                  |
| 2/6      | 7.98 (2H, dd, 8.4 & 1.4)                                      | 128.3               | 3/5    | 2/6, 4, 7        |
| 3/5      | 7.56-7.49 (2H, m)*                                            | 129.4               | 2/6    | 1, 3/5           |
| 4        | 7.60-7.55 (1H, m)*                                            | 132.5               |        | 2/6              |
| 7        |                                                               | 168.0               |        |                  |
| 8        | 7.56-7.51 (1H, m)*                                            |                     | 9      |                  |
| 9        | 4.85 (1H, dd, 8.9 & 2.5)                                      | 57.5                | 8, 11  | 7 (weak), 10, 11 |
| 10       |                                                               | 172.3               |        |                  |
| 11       | 4.62-4.58 (1H, m)                                             | 73.3                | 9, 12  |                  |
| 12       | 3.14 (1H, dd, 13.7 & 5.1)<br>3.03 (1H, dd, 13.7 & 8.3)        | 41.4                | 11, 12 | 9, 11, 13, 14    |
| 13       |                                                               | 148.1               |        |                  |
| 14       | 7.62 (2H, d, 8.8)                                             | 131.7               | 15     | 14, 15, 16       |
| 15       | 8.17 (2H, d, 8.8)                                             | 124.1               | 14     | 13, 15           |
| 16       |                                                               | 147.7               |        |                  |
| 10-OH    | NS                                                            |                     |        |                  |
| 11-OH    | NS                                                            |                     |        |                  |

\*H-3/5, H-4 and H-8 make up a multiplet from 7.60-7.49 ppm. More accurate chemical shift ranges were found from HSQC-edited (H-3/5 and H-4) and COSY (H-8) NMR.

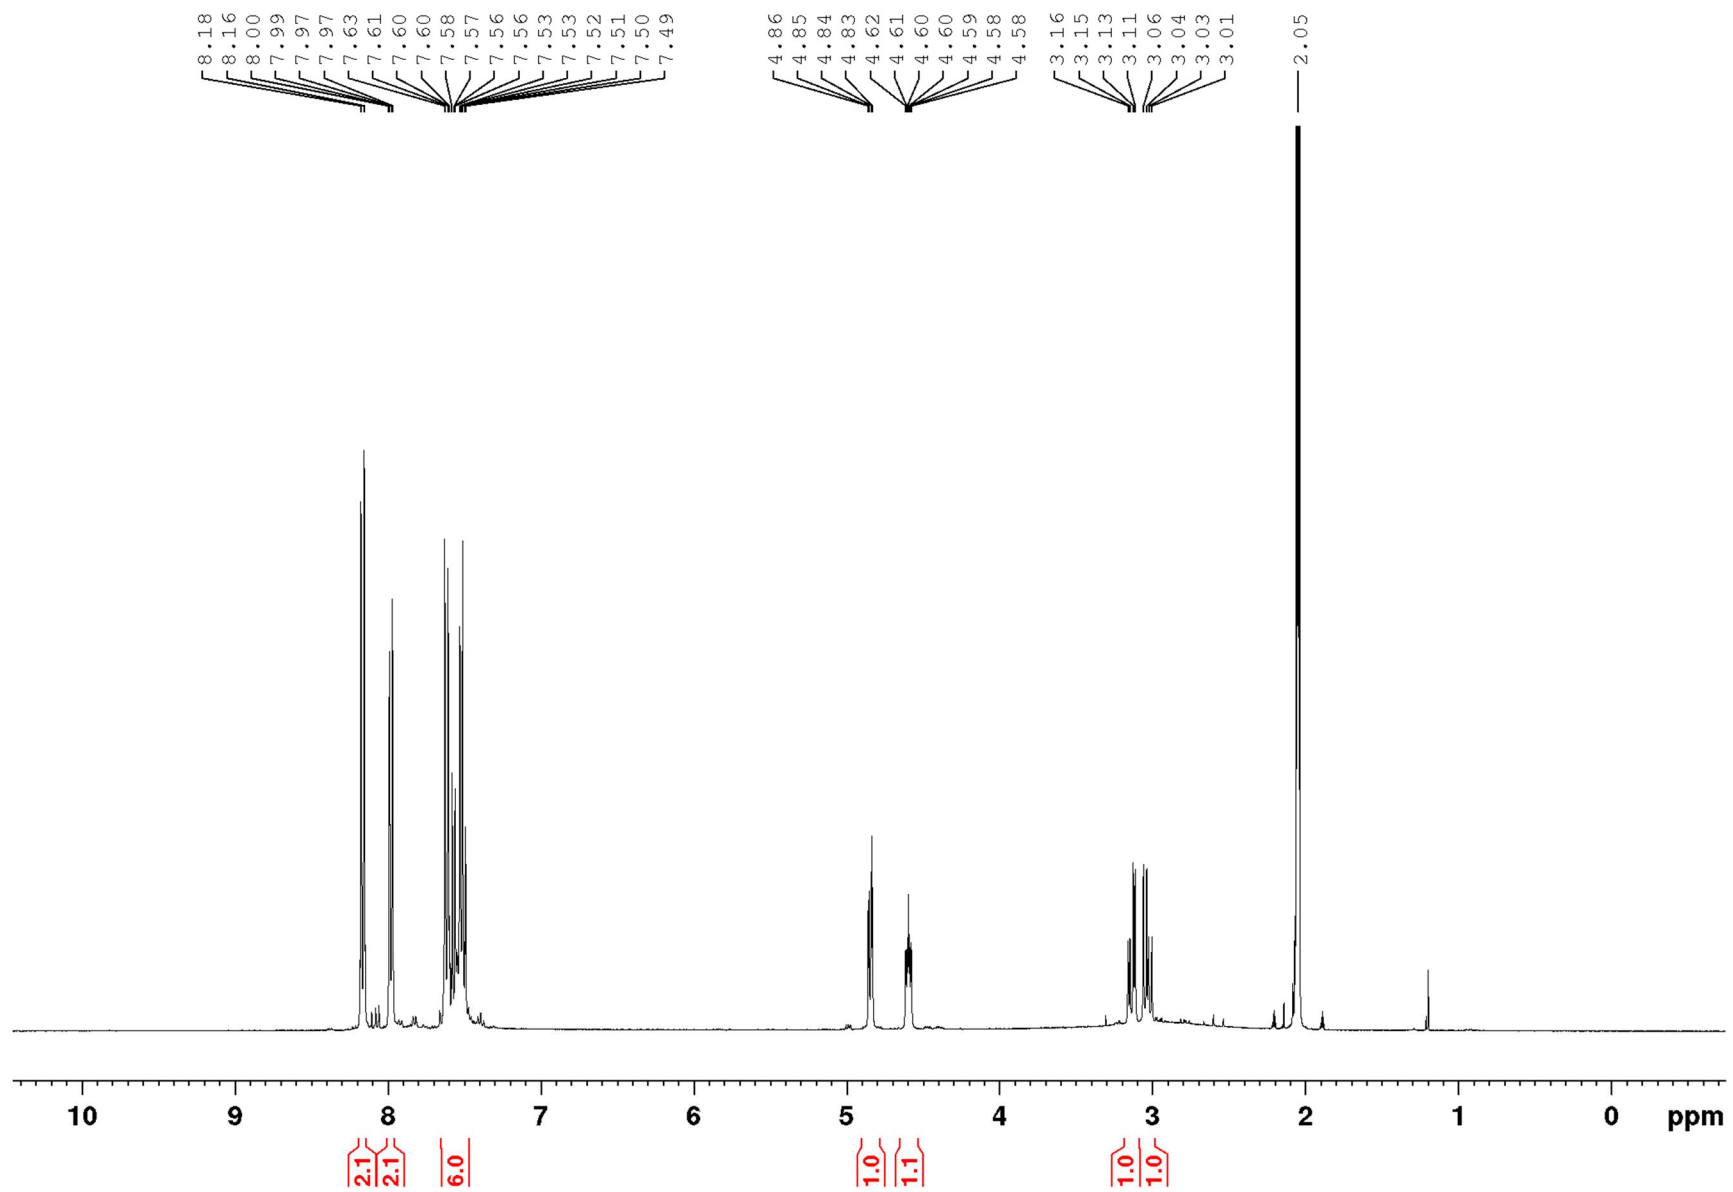

Figure S50:  $^1\text{H}$  NMR for **7** in acetone- $\text{d}_6$  at 298 K.

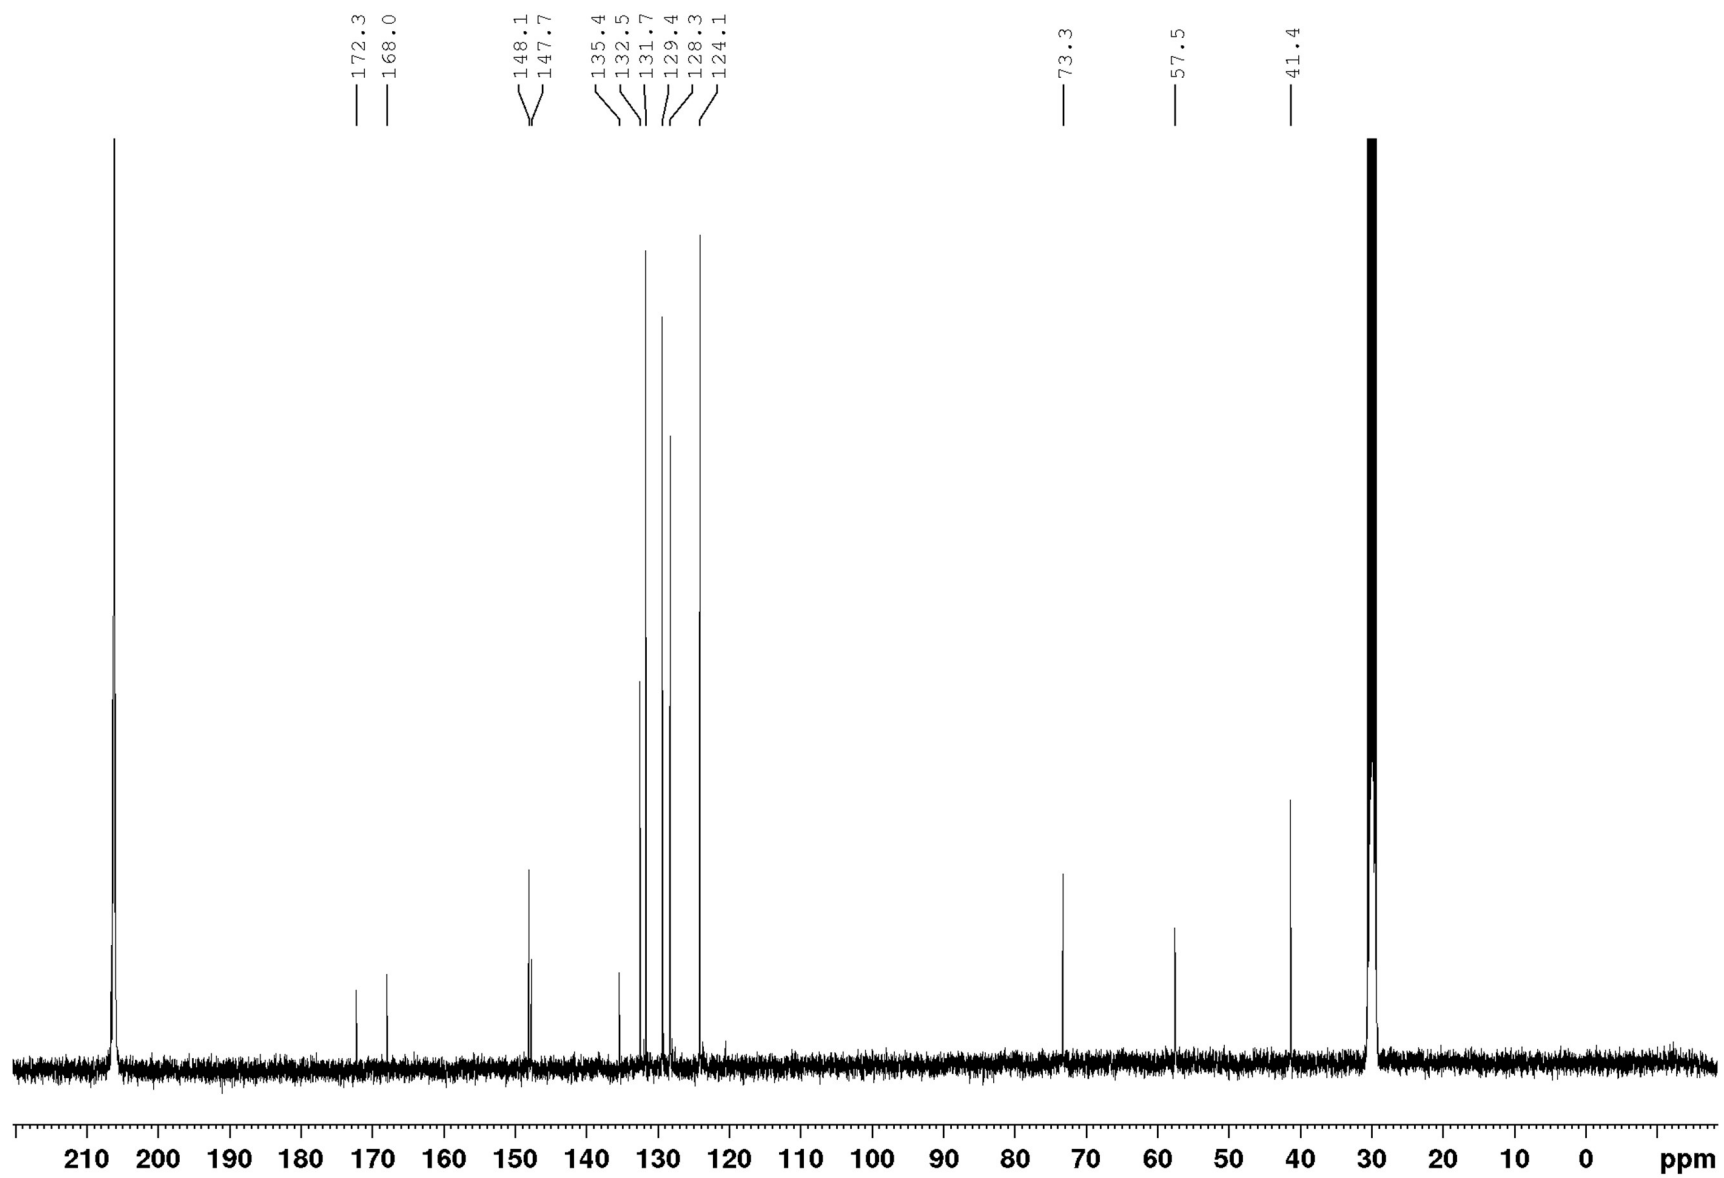

Figure S51:  $^{13}\text{C}$  NMR for 7 in acetone- $\text{d}_6$  at 298 K.

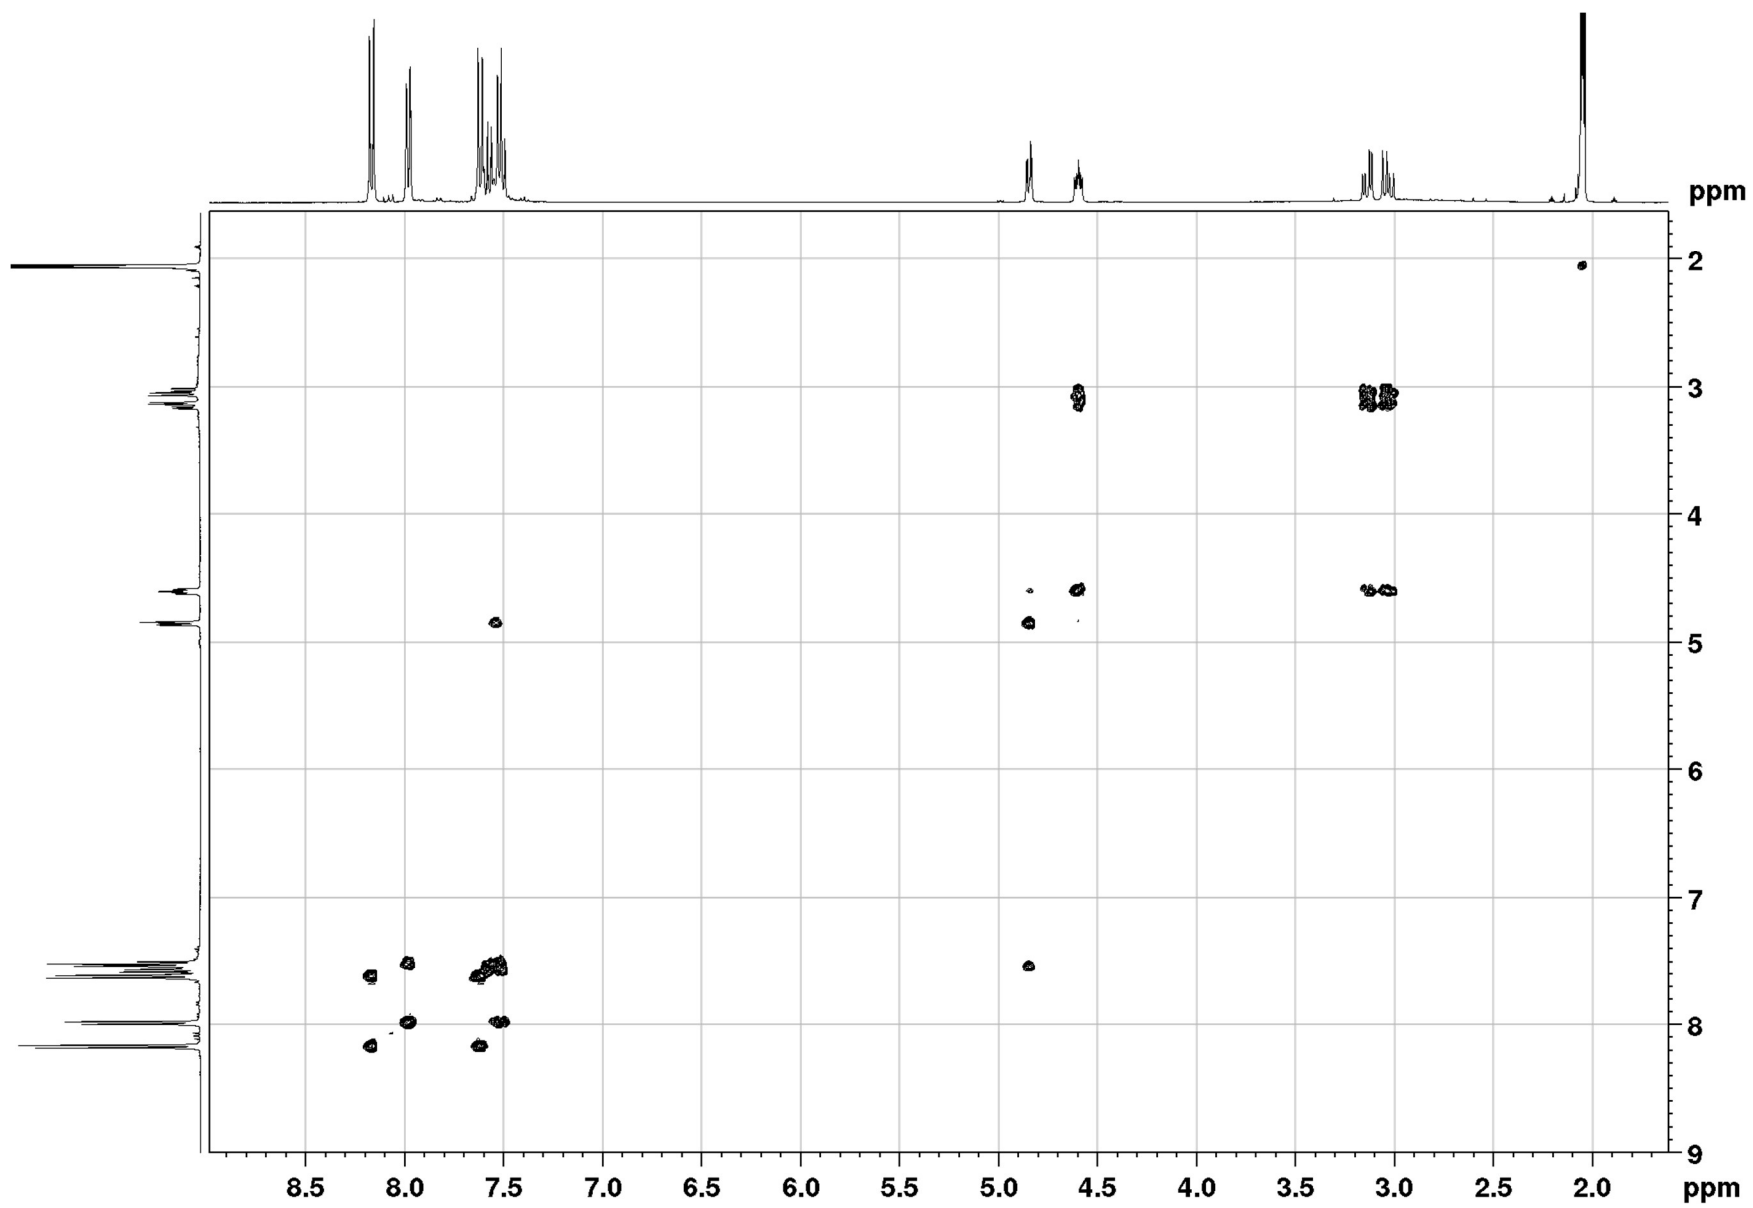

Figure S52: COSY NMR for 7 in acetone-d<sub>6</sub> at 298 K.

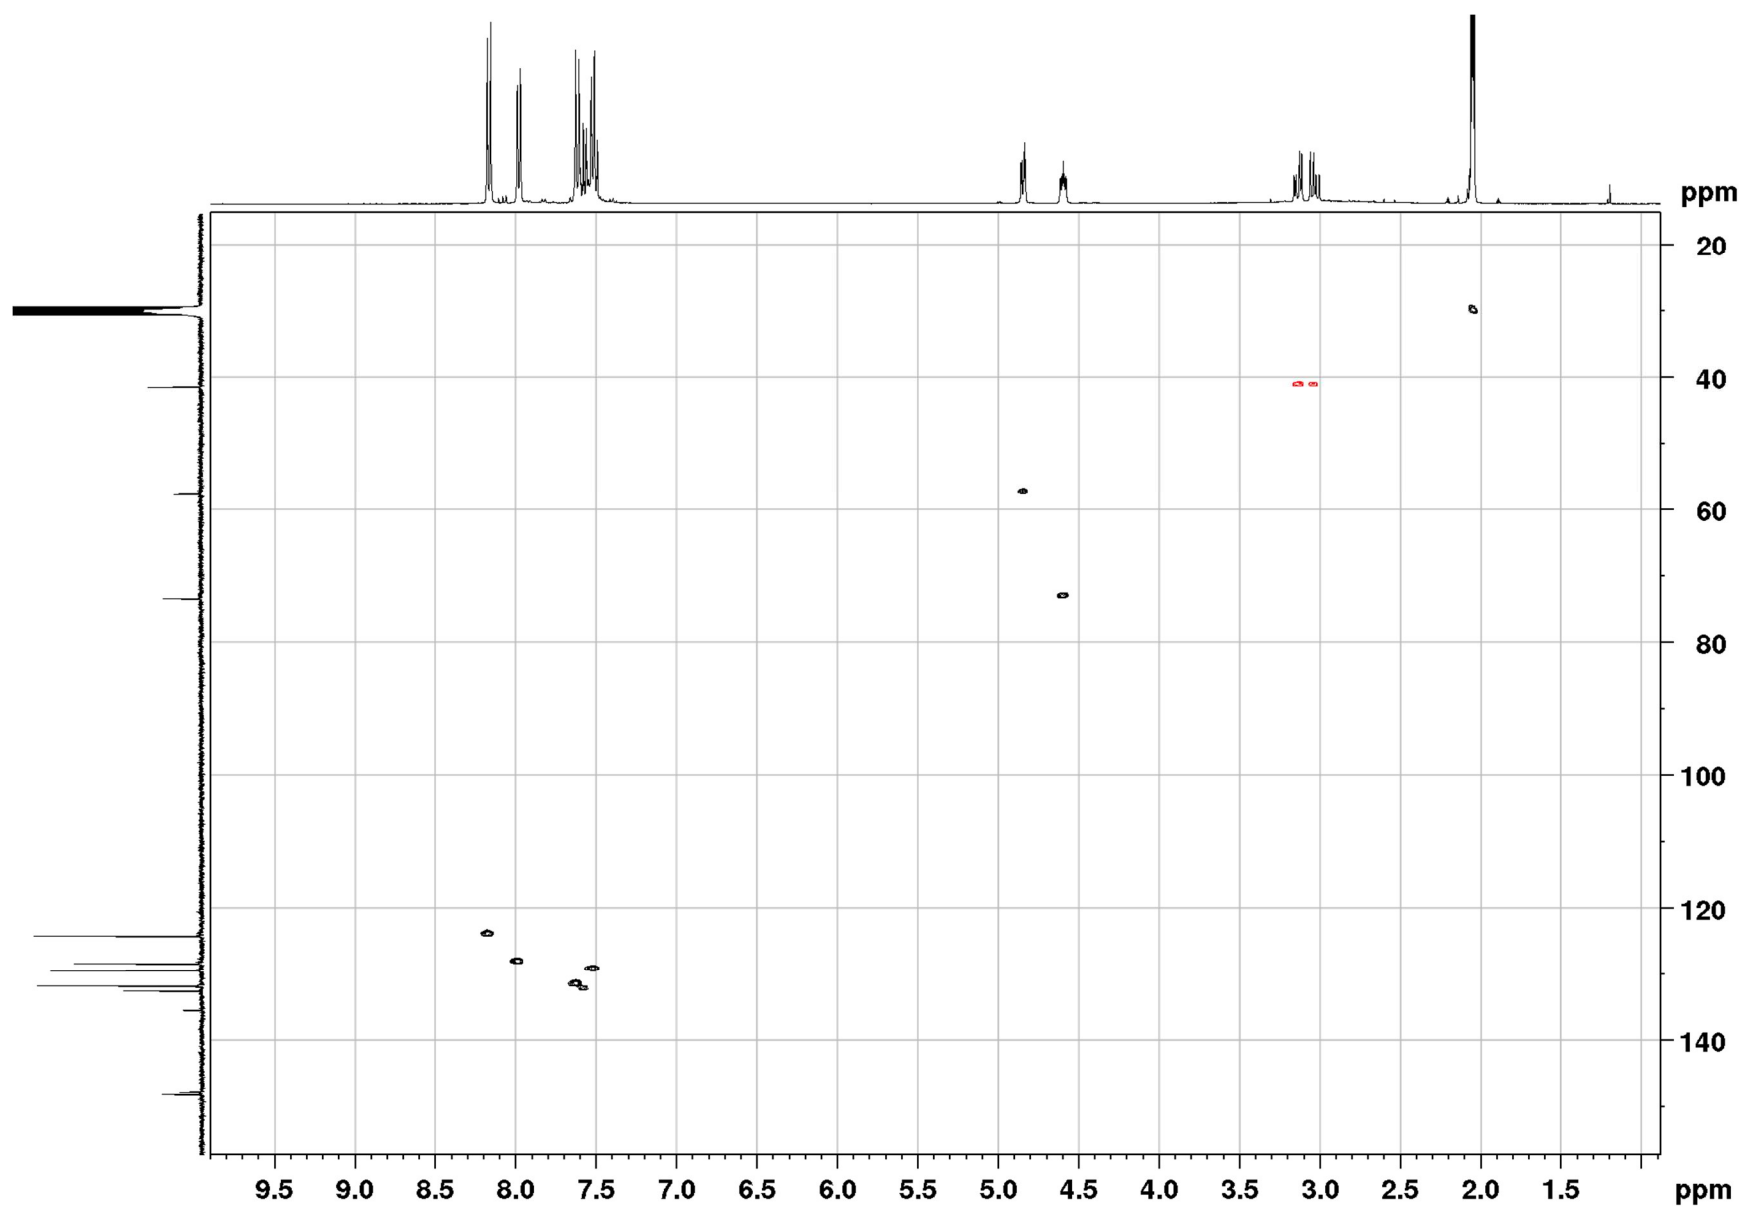

**Figure S53:** HSQC-edited NMR for 7 in acetone-d<sub>6</sub> at 298 K.

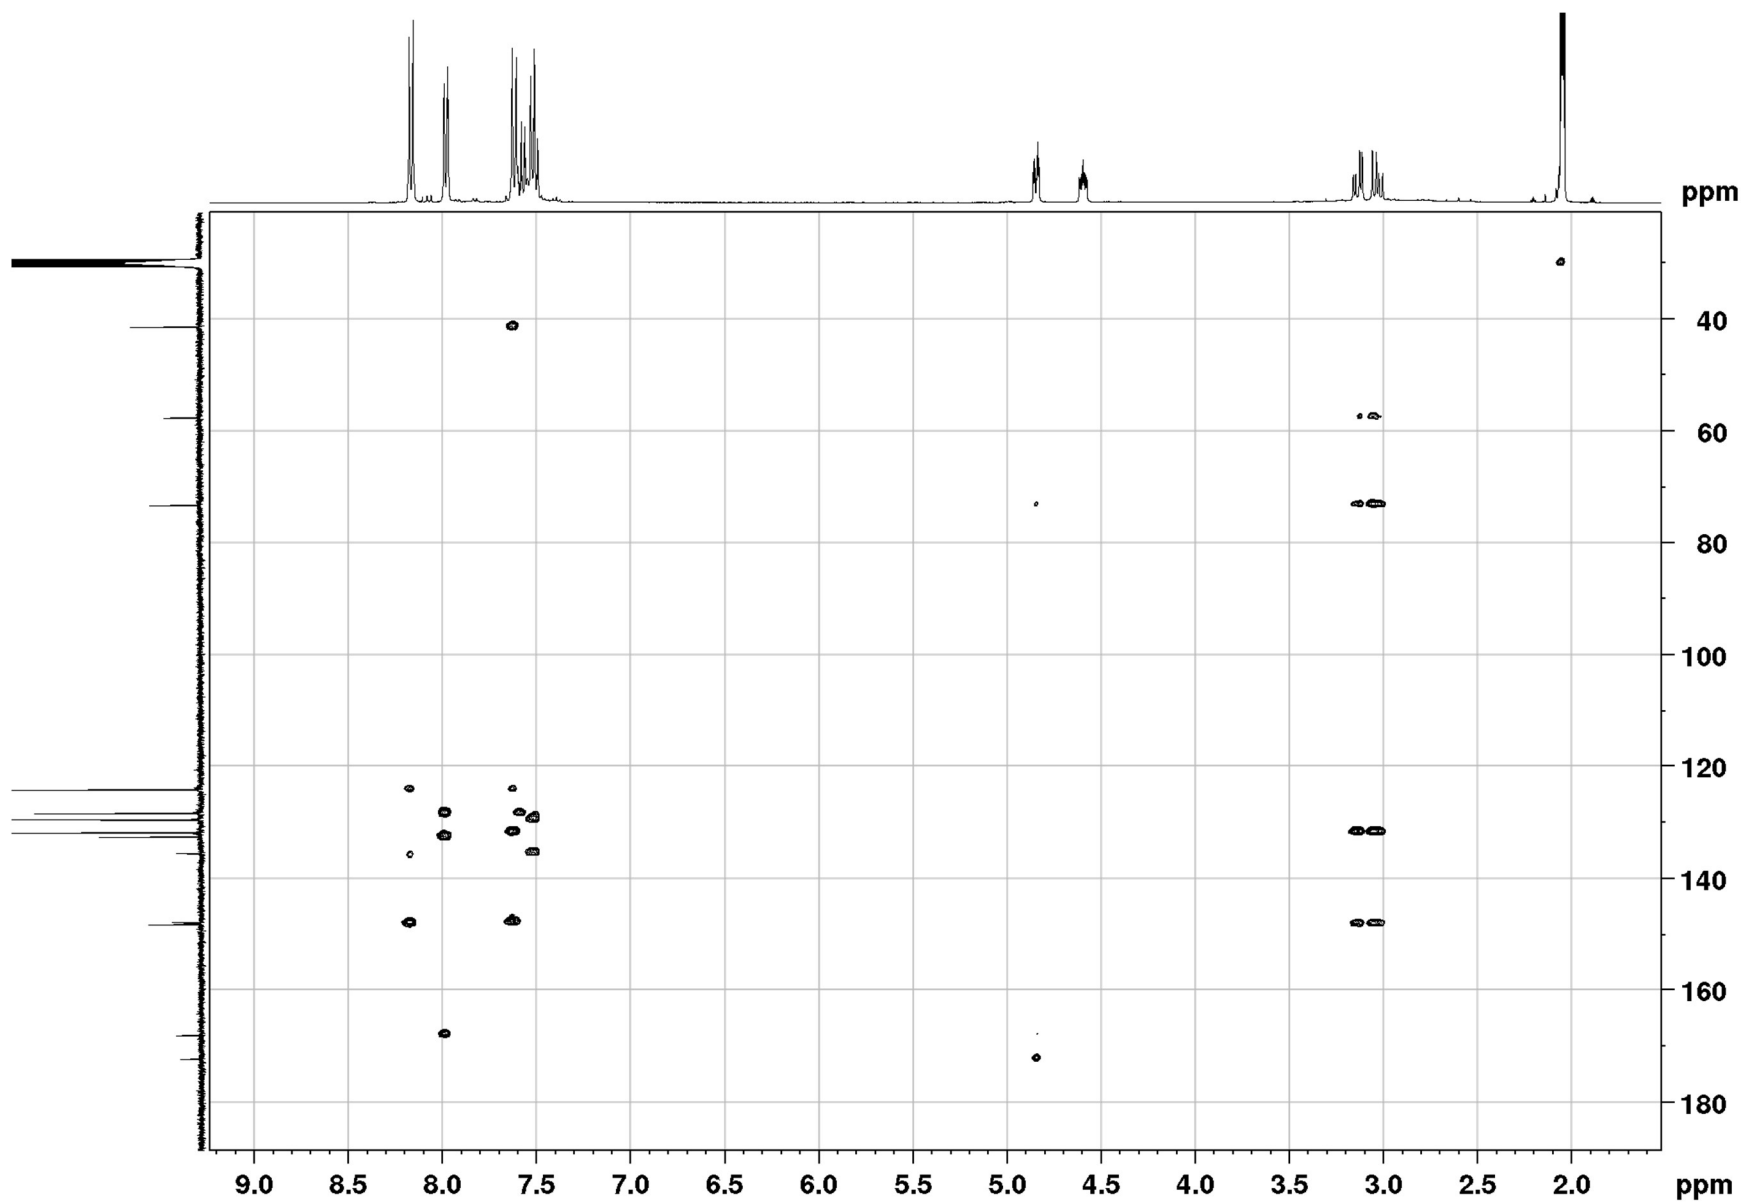

Figure S54: HMBC NMR for 7 in acetone-d<sub>6</sub> at 298 K.



## References

1. B. Schwyn and J. B. Neilands, Universal chemical assay for the detection and determination of siderophores, *Anal. Biochem.*, 1987, **160**, 47–56.
2. K. N. Raymond, B. E. Allred and A. K. Sia, Coordination chemistry of microbial iron transport, *Acc. Chem. Res.*, 2015, **48**, 2496–2505.
3. K. R. Reid, M. E. Meyerhoff and J. T. Mitchell-Koch, Salicylate detection by complexation with iron(III) and optical absorbance spectroscopy., *J. Chem. Educ.*, 2008, **85**, 1658.
4. J. S. Renny, L. L. Tomasevich, E. H. Tallmadge and D. B. Collum, Method of continuous variations: applications of Job plots to the study of molecular associations in organometallic chemistry, *Angew. Chemie Int. Ed.*, 2013, **52**, 11998–12013.
5. H. M. D. Bandara, D. P. Kennedy, E. Akin, C. D. Incarvito and S. C. Burdette, Photoinduced release of Zn<sup>2+</sup> with ZinCleave-1: a nitrobenzyl-based caged complex, *Inorg. Chem.*, 2009, **48**, 8445–8455.
6. T. A. Scott, S. F. D. Batey, P. Wiencek, G. Chandra, S. Alt, C. S. Francklyn and B. Wilkinson, Immunity-guided identification of threonyl-tRNA synthetase as the molecular target of obafluorin, a  $\beta$ -lactone antibiotic, *ACS Chem. Biol.*, 2019, **14**, 2663–2671.
7. N. Babij, E. O. McCusker, G. T. Whiteker, B. Canturk, N. Choy, L. C. Creemer, C. V. De Amicis, N. M. Hewlett, P. L. Johnson, J. A. Knobelsdorf, F. Li, B. A. Lorsbach, B. M. Nugent, S. J. Ryan, M. R. Smith, and Q. Yang, NMR Chemical Shifts of Trace Impurities: Industrially Preferred Solvents Used in Process and Green Chemistry, *Org. Process Res. Dev.* 2016, **20**, 661–667.
